# Supplementary material for: Leveraging the monomer structure for high-performance chemically recyclable semiaromatic polyesters
Source: Royal Society of Chemistry journal article supplement (doi:10.1039/d2py01491b), 2023-01-01
Supplement: d2py01491b1.pdf [file d2py01491b1.pdf]

Supporting Information for

## Leveraging the monomer structure for high-performance chemically recyclable semiaromatic polyesters

Hua-Zhong Fan,<sup>a</sup> Xing Yang,<sup>a</sup> Yan-Chen Wu,<sup>a</sup> Qing Cao,<sup>a</sup> Zhongzheng Cai,<sup>\*a</sup> Jian-Bo Zhu<sup>\*a</sup>

<sup>a</sup>National Engineering Laboratory of Eco-Friendly Polymeric Materials (Sichuan), College of Chemistry, Sichuan University, 29 Wangjiang Road, Chengdu, 610064, People's Republic of China

| <b>TABLE OF CONTENTS</b>                 |                                                                                     | <b>Page(s)</b> |
|------------------------------------------|-------------------------------------------------------------------------------------|----------------|
| <b>Materials and Methods</b>             |                                                                                     | S3-S4          |
| <b>General Monomer Preparations</b>      |                                                                                     | S5-S9          |
| Fig. S1                                  | <sup>1</sup> H NMR (CDCl <sub>3</sub> , 25 °C) spectrum of DHB-Me                   | S10            |
| Fig. S2                                  | <sup>1</sup> H NMR (CDCl <sub>3</sub> , 25 °C) spectrum of ( <i>R</i> )-DHB-Me      | S11            |
| Fig. S3                                  | <sup>13</sup> C NMR (CDCl <sub>3</sub> , 25 °C) spectrum of ( <i>R</i> )-DHB-Me     | S11            |
| Fig. S4                                  | <sup>1</sup> H NMR (CDCl <sub>3</sub> , 25 °C) spectrum of ( <i>S</i> )-DHB-Me      | S12            |
| Fig. S5                                  | <sup>13</sup> C NMR (CDCl <sub>3</sub> , 25 °C) spectrum of ( <i>S</i> )-DHB-Me     | S12            |
| Fig. S6                                  | <sup>1</sup> H NMR (CDCl <sub>3</sub> , 25 °C) spectrum of DHB-Et                   | S13            |
| Fig. S7                                  | <sup>13</sup> C NMR (CDCl <sub>3</sub> , 25 °C) spectrum of DHB-Et                  | S13            |
| Fig. S8                                  | <sup>1</sup> H NMR (CDCl <sub>3</sub> , 25 °C) spectrum of DHN-Me                   | S14            |
| Fig. S9                                  | <sup>13</sup> C NMR (CDCl <sub>3</sub> , 25 °C) spectrum of DHN-Me                  | S14            |
| Fig. S10                                 | <sup>1</sup> H NMR (CDCl <sub>3</sub> , 25 °C) spectrum of ( <i>R</i> )-DHN-Me      | S15            |
| Fig. S11                                 | <sup>13</sup> C NMR (CDCl <sub>3</sub> , 25 °C) spectrum of ( <i>R</i> )-DHN-Me     | S15            |
| Fig. S12                                 | <sup>1</sup> H NMR (CDCl <sub>3</sub> , 25 °C) spectrum of ( <i>S</i> )-DHN-Me      | S16            |
| Fig. S13                                 | <sup>13</sup> C NMR (CDCl <sub>3</sub> , 25 °C) spectrum of ( <i>S</i> )-DHN-Me     | S16            |
| Fig. S14                                 | <sup>1</sup> H NMR (CDCl <sub>3</sub> , 25 °C) spectrum of DHN-Et                   | S17            |
| Fig. S15                                 | <sup>13</sup> C NMR (CDCl <sub>3</sub> , 25 °C) spectrum of DHN-Et                  | S17            |
| <b>General Polymerization Procedures</b> |                                                                                     | S18            |
| Table S1                                 | Results for the copolymerization of DHB-Me and DHB-Et                               | S18            |
| <b>Polymer Characterization</b>          |                                                                                     |                |
| Fig. S16                                 | <sup>1</sup> H NMR (CDCl <sub>3</sub> , 25 °C) spectrum of P(DHB-Me)                | S19            |
| Fig. S17                                 | <sup>13</sup> C NMR (CDCl <sub>3</sub> , 25 °C) spectrum of P(DHB-Me)               | S19            |
| Fig. S18                                 | <sup>1</sup> H NMR (CDCl <sub>3</sub> , 25 °C) spectrum of P[( <i>R</i> )-DHB-Me]   | S20            |
| Fig. S19                                 | <sup>13</sup> C NMR (CDCl <sub>3</sub> , 25 °C) spectrum of P[( <i>R</i> )-DHB-Me]  | S20            |
| Fig. S20                                 | <sup>1</sup> H NMR (CDCl <sub>3</sub> , 25 °C) spectrum of P[( <i>S</i> )-DHB-Me]   | S21            |
| Fig. S21                                 | <sup>13</sup> C NMR (CDCl <sub>3</sub> , 25 °C) spectrum of P[( <i>S</i> )-DHB-Me]  | S21            |
| Fig. S22                                 | <sup>1</sup> H NMR (CDCl <sub>3</sub> , 25 °C) spectrum of P(DHB-Et)                | S22            |
| Fig. S23                                 | <sup>13</sup> C NMR (CDCl <sub>3</sub> , 25 °C) spectrum of P(DHB-Et)               | S22            |
| Fig. S24                                 | <sup>1</sup> H NMR (CDCl <sub>3</sub> , 25 °C) spectrum of P(DHN-Me)                | S23            |
| Fig. S25                                 | <sup>13</sup> C NMR (CDCl <sub>3</sub> , 25 °C) spectrum of P(DHN-Me)               | S23            |
| Fig. S26                                 | <sup>1</sup> H NMR (CDCl <sub>3</sub> , 25 °C) spectrum of P P[( <i>R</i> )-DHN-Me] | S24            |
| Fig. S27                                 | <sup>13</sup> C NMR (CDCl <sub>3</sub> , 25 °C) spectrum of P[( <i>R</i> )-DHN-Me]  | S24            |
| Fig. S28                                 | <sup>1</sup> H NMR (CDCl <sub>3</sub> , 25 °C) spectrum of P P[( <i>S</i> )-DHN-Me] | S25            |
| Fig. S29                                 | <sup>13</sup> C NMR (CDCl <sub>3</sub> , 25 °C) spectrum of P[( <i>S</i> )-DHN-Me]  | S25            |
| Fig. S30                                 | <sup>1</sup> H NMR (CDCl <sub>3</sub> , 25 °C) spectrum of P(DHN-Et)                | S26            |
| Fig. S31                                 | <sup>13</sup> C NMR (CDCl <sub>3</sub> , 25 °C) spectrum of P(DHN-Et)               | S26            |
| Fig. S32                                 | <sup>1</sup> H NMR (CDCl <sub>3</sub> , 25 °C) spectrum of P(DHB-Me-co-DHB-Et)      | S27            |
| Fig. S33                                 | <sup>13</sup> C NMR (CDCl <sub>3</sub> , 25 °C) spectrum of P(DHB-Me-co-DHB-Et)     | S27            |
| Fig. S34                                 | MALDI-TOF MS spectrum (top) of the low-molecular-weight P(DHB-                      | S28            |

|                                                                                   |                                                                                                              |     |
|-----------------------------------------------------------------------------------|--------------------------------------------------------------------------------------------------------------|-----|
|                                                                                   | Me)                                                                                                          |     |
| Fig. S35                                                                          | TGA and DTG curves for P(DHB-Me)                                                                             | S29 |
| Fig. S36                                                                          | TGA and DTG curves for P[( <i>R</i> )-DHB-Me]                                                                | S29 |
| Fig. S37                                                                          | TGA and DTG curves for P(DHB-Et)                                                                             | S30 |
| Fig. S38                                                                          | TGA and DTG curves for P[( <i>R</i> )-DHN-Me]                                                                | S30 |
| Fig. S39                                                                          | TGA and DTG curves for P(DHN-Me)                                                                             | S31 |
| Fig. S40                                                                          | TGA and DTG curves for P(DHN-Et)                                                                             | S31 |
| Fig. S41                                                                          | TGA and DTG curves for P(DHB-Me-co-DHB-Et)                                                                   | S32 |
| Fig. S42                                                                          | DSC curves for P(DHB-Me)                                                                                     | S32 |
| Fig. S43                                                                          | DSC curves for P[( <i>R</i> )-DHB-Me]                                                                        | S33 |
| Fig. S44                                                                          | DSC curves for P(DHB-Et)                                                                                     | S33 |
| Fig. S45                                                                          | DSC curves for P(DHN-Me)                                                                                     | S34 |
| Fig. S46                                                                          | DSC curves for P[( <i>R</i> )-DHN-Me]                                                                        | S34 |
| Fig. S47                                                                          | DSC curves for P(DHN-Et)                                                                                     | S35 |
| Fig. S48                                                                          | DSC curves for P(DHB-Me-co-DHB-Et)                                                                           | S35 |
| Fig. S49                                                                          | GPC trace of P(DHB-Me)                                                                                       | S36 |
| Fig. S50                                                                          | GPC trace of P[( <i>R</i> )-DHB-Me]                                                                          | S36 |
| Fig. S51                                                                          | GPC trace of P(DHB-Et)                                                                                       | S37 |
| Fig. S52                                                                          | GPC trace of P(DHN-Me)                                                                                       | S37 |
| Fig. S53                                                                          | GPC trace of P[( <i>R</i> )-DHN-Me]                                                                          | S38 |
| Fig. S54                                                                          | GPC trace of P(DHN-Et)                                                                                       | S38 |
| Fig. S55                                                                          | GPC trace of P(DHB-Me-co-DHB-Et)                                                                             | S39 |
| <b>General Stereocomplexation procedures</b>                                      |                                                                                                              |     |
| Fig. S56                                                                          | DSC and PXRD spectra of P(DHB-Me)s and P(DHN-Me)s                                                            | S40 |
| <b>Mechanical Property</b>                                                        |                                                                                                              |     |
| Table S2                                                                          | Summary of mechanical properties of polymers                                                                 | S41 |
| Table S3                                                                          | Summary of mechanical properties of P(DHB-Me)                                                                | S41 |
| Fig. S57                                                                          | Stress-strain curves of P(DHB-Me)                                                                            | S41 |
| Table S4                                                                          | Summary of mechanical properties of P(DHB-Me)s                                                               | S42 |
| Fig. S58                                                                          | Stress-strain curves of P(DHB-Me)s                                                                           | S42 |
| Table S5                                                                          | Summary of mechanical properties of P(DHB-Et)                                                                | S43 |
| Fig. S59                                                                          | Stress-strain curves of P(DHB-Et)                                                                            | S43 |
| Table S6                                                                          | Summary of mechanical properties of P(DHN-Me)                                                                | S44 |
| Fig. S60                                                                          | Stress-strain curves of P(DHN-Me)                                                                            | S44 |
| Table S7                                                                          | Summary of mechanical properties of P(DHN-Et)                                                                | S45 |
| Fig. S61                                                                          | Stress-strain curves of P(DHN-Et)                                                                            | S45 |
| Table S8                                                                          | Summary of mechanical properties of P(DHB-Me-co-DHB-Et)                                                      | S46 |
| Fig. S62                                                                          | Stress-strain curves of P(DHB-Me-co-DHB-Et)                                                                  | S46 |
| <b>Thermodynamic Study</b>                                                        |                                                                                                              |     |
| Table S9                                                                          | Raw data over equilibrium conversion at various temperature for DHB-Me                                       | S47 |
| Fig. S63                                                                          | Van't Hoff plot of $\ln[\text{DHB-Me}]_{\text{eq}}$ vs. reciprocal of the absolute temperature ( $T^{-1}$ ). | S47 |
| <b>General procedure for the depolymerization of polymers in dilute solutions</b> |                                                                                                              |     |
| Table S10                                                                         | Results for depolymerization of P(M)s in dilute solutions                                                    | S48 |
| Fig. S64                                                                          | $^1\text{H}$ NMR spectra of the depolymerization products of P(DHB-Et)                                       | S48 |
| Fig. S65                                                                          | $^1\text{H}$ NMR spectra of the depolymerization products of P(DHN-Me)                                       | S49 |
| Fig. S66                                                                          | $^1\text{H}$ NMR spectra of the depolymerization products of P(DHN-Et)                                       | S49 |
| <b>References</b>                                                                 |                                                                                                              |     |
|                                                                                   |                                                                                                              | S50 |

## Materials and Methods

All synthesis and manipulations of air- and moisture-sensitive materials were carried out in an argon-filled glovebox. All reagents from Adamas-beta and Energy Chemical were used as received unless otherwise stated. High-performance liquid chromatography (HPLC)-grade organic solvents were dried by Vigor YJC-5 and then stored over activated 4 Å molecular sieves. The initiator *p*-tolylmethanol was purchased from adamas and sublimed at 55 °C prior to use. 1,5,7-triazabicyclo[4.4.0]dec-5-ene (TBD) was sublimed under vacuum at 60 °C prior to use. 2,6-diethylphenyl substituted  $\beta$ -diiminate zinc trimethylsilyl complex **Zn1** was prepared according to literature procedures.<sup>[1]</sup>

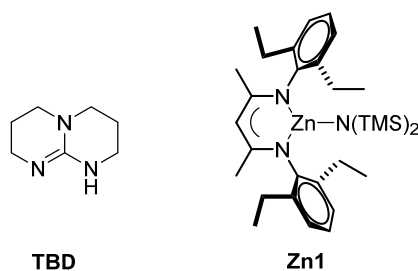

**NMR** <sup>1</sup>H and <sup>13</sup>C NMR spectra were recorded on an Agilent 400-MR DD2 or a Bruker Advance 400 spectrometer (<sup>1</sup>H: 400 MHz, <sup>13</sup>C: 100 MHz). Chemical shifts ( $\delta$ ) for <sup>1</sup>H and <sup>13</sup>C NMR spectra are given in ppm relative to TMS. The residual solvent signals were used as references for <sup>1</sup>H and <sup>13</sup>C NMR spectra and the chemical shifts converted to the TMS scale. The following abbreviations were used to explain the multiplicities: s = singlet, d = doublet, t = triplet, q = quartet, m = multiplet.

**Size Exclusion Chromatography (SEC)** Measurements of polymer absolute weight-average molecular weight ( $M_w$ ), number average molecular weight ( $M_n$ ), and molecular weight distributions or dispersity indices ( $\mathcal{D} = M_w/M_n$ ) were performed via size exclusion chromatography (SEC). The SEC instrument consisted of an Agilent LC system equipped with one guard column and two PL gel 5  $\mu$ m mixed-C gel permeation columns and coupled with an Agilent G7162A 1260 Infinity II RI detector. The analysis was performed at 40 °C using THF as the eluent at a flow rate of 1.0 mL/min. The instrument was calibrated with nine polystyrene standards, and chromatograms were processed with Agilent OpenLab CDS Acquisition 2.5 molecular weight characterization software.

**Differential scanning calorimetry (DSC)** Melting-transition temperature ( $T_m$ ) and glass-transition temperature ( $T_g$ ) of purified and thoroughly dried polymer samples were measured by differential scanning calorimetry (DSC) on a TRIOS DSC25, TA Instrument. All  $T_g$  values were obtained from a second scan after the thermal history was removed from the first scan.

**Thermo-gravimetric analysis (TGA)** Decomposition onset temperatures ( $T_{\text{onset}}$ ) and maximum rate decomposition temperatures ( $T_{\text{max}}$ ) of the polymers were measured by thermal gravimetric analysis (TGA) on a TGA55 Analyzer, TA Instrument. Polymer samples were heated from ambient temperature to 600 °C at a heating rate of 10 °C/min. Values of  $T_{\text{max}}$  were obtained from derivative (wt%/°C) vs. temperature (°C) plots and defined by the peak values, while  $T_{\text{onset}}$  values were obtained from wt% vs. temperature (°C) plots and defined by the temperature of 5% weight loss.

**Matrix-assisted laser desorption/ionization time-of-flight mass spectroscopy**

**(MALDI-TOF MS).** An AXIMA performance instrument was used in reflection mode with dithranol as the matrix. A thin layer of a 1% NaI solution was first deposited on the target plate, followed by the solutions of matrix (5  $\mu$ L, 5 mg/mL in dichloromethane) and polymer (2  $\mu$ L, 5 mg/mL in dichloromethane) were mixed together. The mixed solution was spotted on the MALDI sample plate and air-dried. The raw data was processed in the Shimadzu Biotech MALDI-MS software.

**Wide angle X-ray diffraction (WXR)** Powder X-ray diffraction data were obtained using a Bruker D2 Phaser diffractometer with Cu-K $\alpha$  radiation ( $\lambda = 1.5416$  A) at 30 kV and 10 mA (scan of  $2\theta = 5-30^\circ$  with a speed of  $2^\circ/\text{min}$ ).

**Mechanical Analysis.** Tensile stress/strain testing was performed by an Instron 34SC-1 universal testing system. Samples were made by melt press in a steel mold ( $50 \times 4 \times 0.4$  mm<sup>3</sup>) and were stretched at a strain rate of 10 mm/min at ambient temperature until break. The measurements were performed 3-5 times for each test, and the values reported are averaged from the measured data.

## General Monomer Preparations

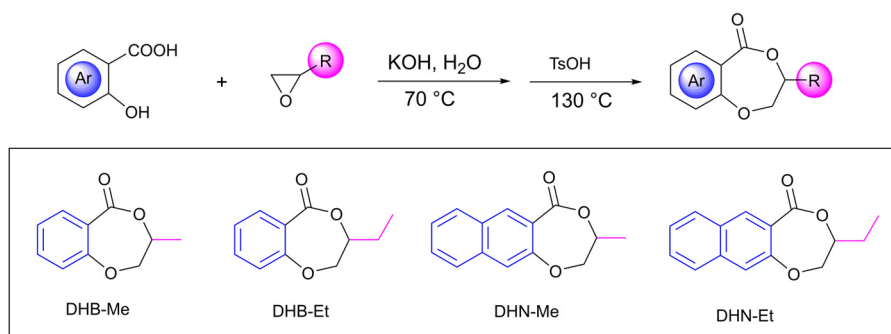

**Scheme S1.** Synthesis of monomers.

### Synthesis of DHB-Me

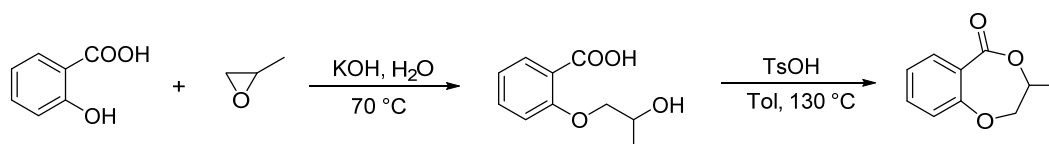

A 75 mL pressure tube equipped with a stir bar was charged with salicylic acid (6.9 g, 0.05 mol), KOH (5.6 g, 0.1 mol), H<sub>2</sub>O (3.6 mL, 0.2 mol) and propylene oxide (14.0 mL, 0.2 mol). After stirring for 12 h at 70 °C, the reaction was quenched by the addition of 12 M HCl (9 mL) slowly and diluted with water (30 mL), then the mixture was extracted with ethyl acetate (3 × 50 mL). The combined organic layers were dried over anhydrous Na<sub>2</sub>SO<sub>4</sub>, filtrated, and concentrated in vacuo. The crude product was directly used for the next step.

In a 500 mL flask which connected to a Dean-Stark trap, the above crude product was dissolved in 300 mL toluene and 1.9 g TsOH was used as catalyst. After refluxing for 12 h at 130 °C, the reaction mixture was cooled to room temperature and concentrated in vacuo. The crude product was purified by flash chromatography (petroleum ether/ethyl acetate = 20: 1) to afford DHB-Me as white solid (5.0 g, 56% for two steps). <sup>1</sup>H NMR (400 MHz, CDCl<sub>3</sub>): δ 7.86 (d, *J* = 7.9 Hz, 1H), 7.47 (t, *J* = 7.8 Hz, 1H), 7.13 – 7.09 (m, 1H), 7.00 (dd, *J* = 8.3, 1.3 Hz, 1H), 4.75 – 4.68 (m, 1H), 4.36 – 4.26 (m, 2H), 1.40 (d, *J* = 6.7 Hz, 3H).

### Synthesis of (*R*)-DHB-Me

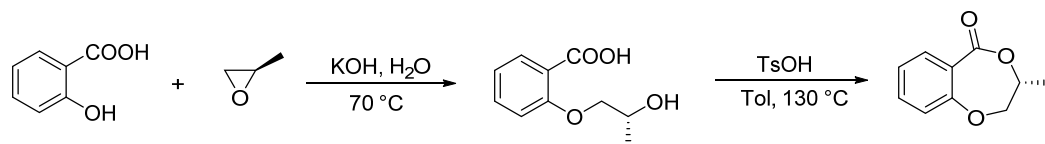

A 75 mL pressure tube equipped with a stir bar was charged with salicylic acid (6.9 g, 0.05 mol), KOH (5.6 g, 0.1 mol), H<sub>2</sub>O (3.6 mL, 0.2 mol) and (*R*)-propylene oxide (12.9 mL, 0.2 mol). After stirring for 12 h at 70 °C, the reaction was quenched by the addition of 12 M HCl (9 mL) slowly and diluted with water (30 mL), then the mixture was extracted with ethyl acetate (3 × 50 mL). The combined organic layers were dried over anhydrous Na<sub>2</sub>SO<sub>4</sub>, filtrated, and concentrated in vacuo. The crude product was directly used for the next step.

In a 500 mL flask which connected to a Dean-Stark trap, the above crude product was dissolved in 300 mL toluene and 1.9 g TsOH was used as catalyst. After refluxing for 12 h at 130 °C, the reaction mixture was cooled to room temperature and concentrated in vacuo. The crude product was purified by flash chromatography (petroleum ether/ethyl acetate = 20: 1) to afford (*R*)-DHB-Me as white solid (4.4 g, 49% for two steps). <sup>1</sup>H NMR (400 MHz, CDCl<sub>3</sub>): δ 7.86 (dd, J = 7.9, 1.8 Hz, 1H), 7.50 – 7.46 (m, 1H), 7.14 – 7.10 (m, 1H), 7.00 (d, J = 8.3 Hz, 1H), 4.76 – 4.68 (m, 1H), 4.36 – 4.26 (m, 2H), 1.40 (d, J = 6.6 Hz, 3H). <sup>13</sup>C NMR (100 MHz, CDCl<sub>3</sub>): δ 168.5, 155.0, 134.7, 133.2, 122.9, 120.9, 120.4, 75.6, 72.4, 16.3. ESI-MS: calculated m/z 179.0708; found m/z 179.0706 [M + H]<sup>+</sup>.

#### Synthesis of (*S*)-DHB-Me

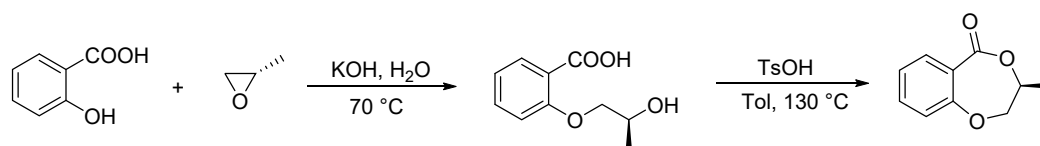

A 75 mL pressure tube equipped with a stir bar was charged with salicylic acid (6.9 g, 0.05 mol), KOH (5.6 g, 0.1 mol), H<sub>2</sub>O (3.6 mL, 0.2 mol) and (*S*)-propylene oxide (12.9 mL, 0.2 mol). After stirring for 12 h at 70 °C, the reaction was quenched by the addition of 12 M HCl (9 mL) slowly and diluted with water (30 mL), then the mixture was extracted with ethyl acetate (3 × 50 mL). The combined organic layers were dried over anhydrous Na<sub>2</sub>SO<sub>4</sub>, filtrated, and concentrated in vacuo. The crude product was directly used for the next step.

In a 500 mL flask which connected to a Dean-Stark trap, the above crude product was dissolved in 300 mL toluene and 1.9 g TsOH was used as catalyst. After refluxing for 12 h at 130 °C, the reaction mixture was cooled to room temperature and concentrated in vacuo. The crude product was purified by flash chromatography (petroleum ether/ethyl acetate = 20: 1) to afford (*S*)-DHB-Me as white solid (3.8 g, 43% for two steps). <sup>1</sup>H NMR (400 MHz, CDCl<sub>3</sub>): δ 7.87 (dd, J = 8.0, 1.6 Hz, 1H), 7.51-7.46 (m, 1H), 7.12 (dd, J = 8.1, 7.1 Hz, 1H), 7.01 (d, J = 8.3 Hz, 1H), 4.76-4.69 (m, 1H), 4.37-4.27 (m, 2H), 1.41 (d, J = 6.6 Hz, 3H). <sup>13</sup>C NMR (100 MHz, CDCl<sub>3</sub>): δ 168.5, 155.1, 134.8, 133.3, 122.9, 120.9, 120.4, 75.6, 72.4, 16.3. ESI-MS: calculated m/z 179.0708; found m/z 179.0706 [M + H]<sup>+</sup>.

#### Synthesis of DHB-Et

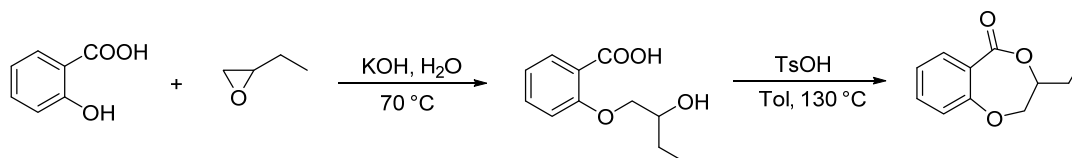

A 75 mL pressure tube equipped with a stir bar was charged with salicylic acid (6.9 g, 0.05 mol), KOH (5.6 g, 0.1 mol), H<sub>2</sub>O (3.6 mL, 0.2 mol) and 1,2-epoxybutane (16.4 mL, 0.2 mol). After stirring for 24 h at 70 °C, the reaction was quenched by the addition of 12 M HCl (9 mL) slowly and diluted with water (30 mL), then the mixture was extracted with ethyl acetate (3 × 50 mL). The combined organic layers were dried over anhydrous Na<sub>2</sub>SO<sub>4</sub>, filtrated, and concentrated in vacuo. The crude product was directly used for the next step.

In a 500 mL flask which connected to a Dean-Stark trap, the above crude product was dissolved in 300 mL toluene, and 1.9 g TsOH was used as catalyst. After refluxing for 24 h at

130 °C, the reaction mixture was cooled to room temperature and concentrated in vacuo. The crude product was purified by flash chromatography (petroleum ether/ethyl acetate = 20: 1) to afford DHB-Et as white solid (4.4 g, 46% for two steps). <sup>1</sup>H NMR (400 MHz, CDCl<sub>3</sub>): δ 7.89 (dd, *J* = 7.9, 1.8 Hz, 1H), 7.50-7.46 (m, 1H), 7.14-7.10 (m, 1H), 7.00 (dd, *J* = 8.2, 1.2 Hz, 1H), 4.47-4.43 (m, 1H), 4.38-4.33 (m, 2H), 1.84-1.62 (m, 2H), 1.06 (t, *J* = 7.5 Hz, 3H). <sup>13</sup>C NMR (100 MHz, CDCl<sub>3</sub>): δ 168.6, 155.2, 134.7, 133.4, 122.7, 120.8, 120.1, 77.4, 74.4, 24.0, 9.7. ESI-MS: calculated *m/z* 193.0865; found *m/z* 193.0862 [M + H]<sup>+</sup>.

### Synthesis of DHN-Me

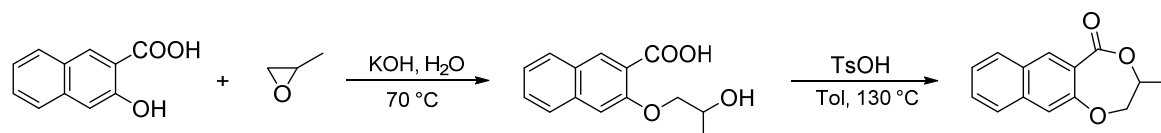

A 75 mL pressure tube equipped with a stir bar was charged with 3-Hydroxy-2-naphthoic acid (9.4 g, 0.05 mol), KOH (5.6 g, 0.1 mol), H<sub>2</sub>O (10 mL) and propylene oxide (14.0 mL, 0.2 mol). After stirring for 12 h at 70 °C, the reaction was quenched by the addition of 12 M HCl (9 mL) slowly and diluted with water (30 mL), then the mixture was extracted with ethyl acetate (3 × 50 mL). The combined organic layers were dried over anhydrous Na<sub>2</sub>SO<sub>4</sub>, filtrated, and concentrated in vacuo. The crude product was directly used for the next step.

In a 500 mL flask which connected to a Dean-Stark trap, the above crude product was dissolved in 300 mL toluene, and 1.9 g TsOH was used as catalyst. After refluxing for 12 h at 130 °C, the reaction mixture was cooled to room temperature and concentrated in vacuo. The crude product was purified by flash chromatography (petroleum ether/ethyl acetate = 20: 1) to afford DHN-Me as white solid (7.4 g, 65% for two steps). <sup>1</sup>H NMR (400 MHz, CDCl<sub>3</sub>): δ 8.31 (s, 1H), 7.87 (d, *J* = 8.2 Hz, 1H), 7.76 (d, *J* = 8.3 Hz, 1H), 7.56-7.53 (m, 1H), 7.46 (d, *J* = 7.9 Hz, 2H), 4.70-4.62 (m, 1H), 4.33-4.17 (m, 2H), 1.37 (d, *J* = 6.4 Hz, 3H). <sup>13</sup>C NMR (100 MHz, CDCl<sub>3</sub>): δ 168.9, 150.4, 136.4, 133.4, 129.9, 128.8, 128.7, 126.8, 125.8, 124.6, 118.0, 76.3, 71.8, 15.6. ESI-MS: calculated *m/z* 229.0865; found *m/z* 229.0855 [M + H]<sup>+</sup>.

### Synthesis of (*R*)-DHN-Me

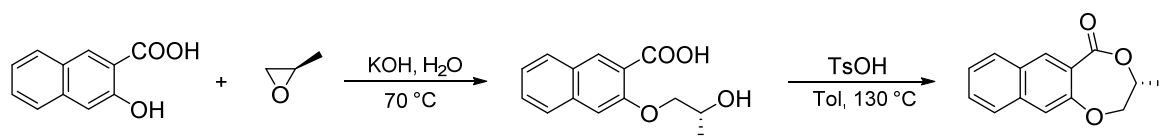

A 75 mL pressure tube equipped with a stir bar was charged with 3-Hydroxy-2-naphthoic acid (9.4 g, 0.05 mol), KOH (5.6 g, 0.1 mol), H<sub>2</sub>O (15 mL) and (*R*)-propylene oxide (12.9 mL, 0.2 mol). After stirring for 12 h at 70 °C, the reaction was quenched by the addition of 12 M HCl (9 mL) slowly and diluted with water (30 mL), then the mixture was extracted with ethyl acetate (3 × 50 mL). The combined organic layers were dried over anhydrous Na<sub>2</sub>SO<sub>4</sub>, filtrated, and concentrated in vacuo. The crude product was directly used for the next step.

In a 500 mL flask which connected to a Dean-Stark trap, the above crude product was dissolved in 300 mL toluene, and 1.9 g TsOH was used as catalyst. After refluxing for 24 h at 130 °C, the reaction mixture was cooled to room temperature and concentrated in vacuo. The crude product was purified by flash chromatography (petroleum ether/ethyl acetate = 20: 1) to

afford (*R*)-DHN-Me as white solid (5.0 g, 44% for two steps). <sup>1</sup>H NMR (400 MHz, CDCl<sub>3</sub>): δ 8.32 (s, 1H), 7.89 (d, *J* = 8.3 Hz, 1H), 7.77 (d, *J* = 8.3 Hz, 1H), 7.58-7.54 (m, 1H), 7.49-7.45 (m, 2H), 4.72-4.64 (m, 1H), 4.32 (t, *J* = 11.1 Hz, 1H), 4.19 (dd, *J* = 11.5, 3.1 Hz, 1H), 1.39 (d, *J* = 6.4 Hz, 3H). <sup>13</sup>C NMR (100 MHz, CDCl<sub>3</sub>): δ 168.9, 150.5, 136.5, 133.4, 130.0, 128.9, 128.7, 126.9, 125.9, 124.6, 118.0, 76.4, 71.8, 15.7. ESI-MS: calculated *m/z* 229.0865; found *m/z* 229.0883 [M + H]<sup>+</sup>.

#### Synthesis of (*S*)-DHN-Me

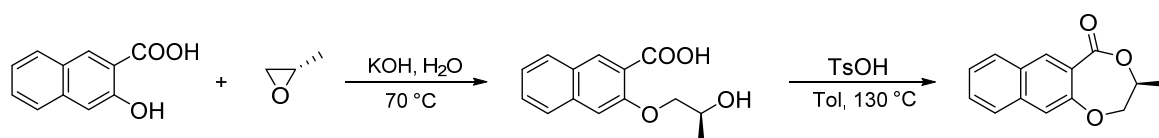

A 75 mL pressure tube equipped with a stir bar was charged with 3-Hydroxy-2-naphthoic acid (9.4 g, 0.05 mol), KOH (5.6 g, 0.1 mol), H<sub>2</sub>O (15 mL) and (*S*)-propylene oxide (12.9 mL, 0.2 mol). After stirring for 12 h at 70 °C, the reaction was quenched by the addition of 12 M HCl (9 mL) slowly and diluted with water (30 mL), then the mixture was extracted with ethyl acetate (3 × 50 mL). The combined organic layers were dried over anhydrous Na<sub>2</sub>SO<sub>4</sub>, filtrated, and concentrated in vacuo. The crude product was directly used for the next step.

In a 500 mL flask which connected to a Dean-Stark trap, the above crude product was dissolved in 300 mL toluene, and 1.9 g TsOH was used as catalyst. After refluxing for 24 h at 130 °C, the reaction mixture was cooled to room temperature and concentrated in vacuo. The crude product was purified by flash chromatography (petroleum ether/ethyl acetate = 20: 1) to afford (*S*)-DHN-Me as white solid (6.3 g, 55% for two steps). <sup>1</sup>H NMR (400 MHz, CDCl<sub>3</sub>): δ 8.32 (s, 1H), 7.89 (dd, *J* = 8.2, 1.2 Hz, 1H), 7.77 (dd, *J* = 8.4, 1.1 Hz, 1H), 7.58-7.54 (m, 1H), 7.49-7.45 (m, 2H), 4.72-4.64 (m, 1H), 4.32 (t, *J* = 11.1 Hz, 1H), 4.19 (dd, *J* = 11.5, 3.1 Hz, 1H), 1.39 (d, *J* = 6.4 Hz, 3H). <sup>13</sup>C NMR (100 MHz, CDCl<sub>3</sub>): δ 168.9, 150.5, 136.5, 133.4, 130.0, 128.9, 128.7, 126.9, 125.9, 124.6, 118.0, 76.4, 71.8, 15.7. ESI-MS: calculated *m/z* 229.0865; found *m/z* 229.0880 [M + H]<sup>+</sup>.

#### Synthesis of DHN-Et

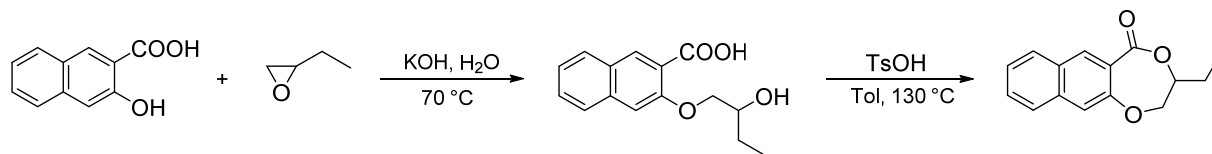

A 75 mL pressure tube equipped with a stir bar was charged with 3-hydroxy-2-naphthoic Acid (9.4 g, 0.05 mol), KOH (5.6 g, 0.1 mol), H<sub>2</sub>O (3.6 mL, 0.2 mol) and 1,2-epoxybutane (16.4 mL, 0.2 mol). After stirring for 24 h at 70 °C, the reaction was quenched by the addition of 12 M HCl (9 mL) slowly and diluted with water (30 mL), then the mixture was extracted with ethyl acetate (3 × 50 mL). The combined organic layers were dried over anhydrous Na<sub>2</sub>SO<sub>4</sub>, filtrated, and concentrated in vacuo. The crude product was directly used for the next step.

In a 500 mL flask which connected to a Dean-Stark trap, the above crude product was dissolved in 300 mL toluene, and 1.9 g TsOH was used as catalyst. After refluxing for 24 h at 130 °C, the reaction mixture was cooled to room temperature and concentrated in vacuo. The crude product was purified by flash chromatography (petroleum ether/ethyl acetate = 20:1) to



afford DHN-Et as white solid (4.1 g, 34% for two steps). <sup>1</sup>H NMR (400 MHz, CDCl<sub>3</sub>): δ 8.34 (s, 1H), 7.90 (d, *J* = 8.2 Hz, 1H), 7.78 (d, *J* = 8.3 Hz, 1H), 7.58 – 7.54 (m, 1H), 7.49 – 7.45 (m, 2H), 4.45 – 4.40 (m, 1H), 4.36 (t, *J* = 10.8 Hz, 1H), 4.24 – 4.20 (m, 1H), 1.82 – 1.60 (m, 2H), 1.04 (t, *J* = 7.4 Hz, 3H). <sup>13</sup>C NMR (100 MHz, CDCl<sub>3</sub>): δ 169.1, 150.5, 136.4, 133.4, 129.9, 128.9, 128.7, 126.8, 125.8, 124.6, 118.0, 76.7, 75.1, 23.4, 9.8. ESI-MS: calculated *m/z* 243.1021; found *m/z* 243.1012 [M + H]<sup>+</sup>.

## NMR spectra of monomers

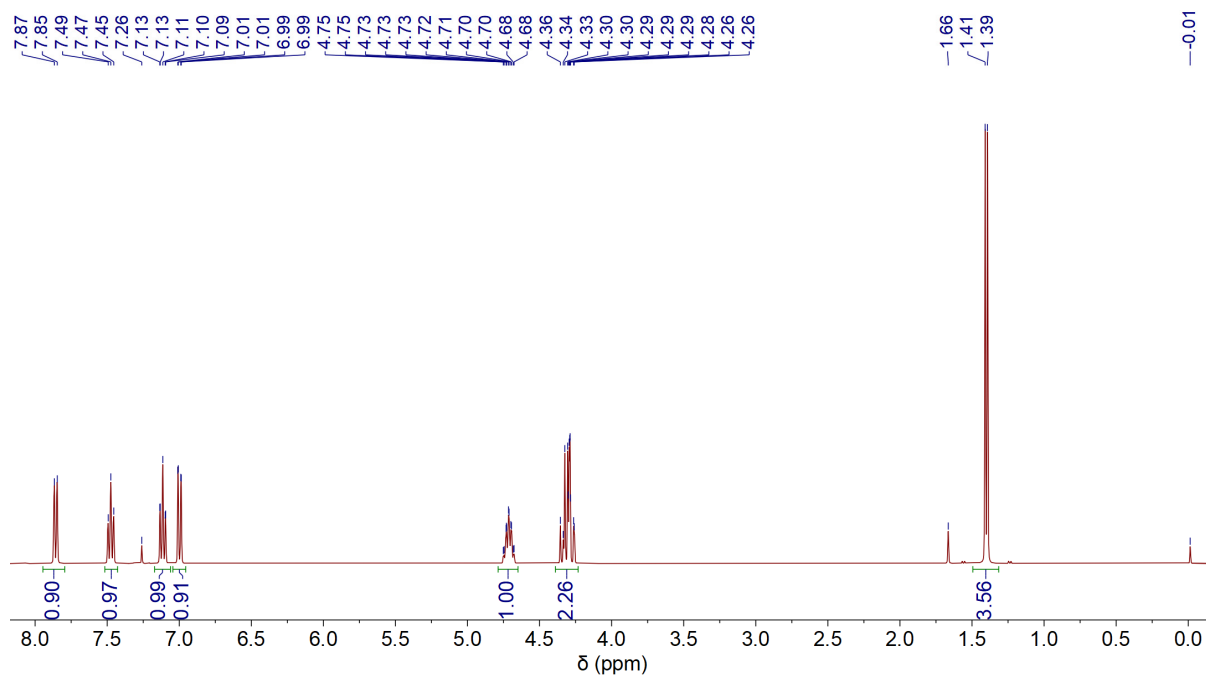

**Fig. S1.** <sup>1</sup>H NMR (CDCl<sub>3</sub>, 25 °C) spectrum of DHB-Me. Residual solvent peaks at 7.26 ppm and 1.66 ppm for CHCl<sub>3</sub> and H<sub>2</sub>O, respectively.

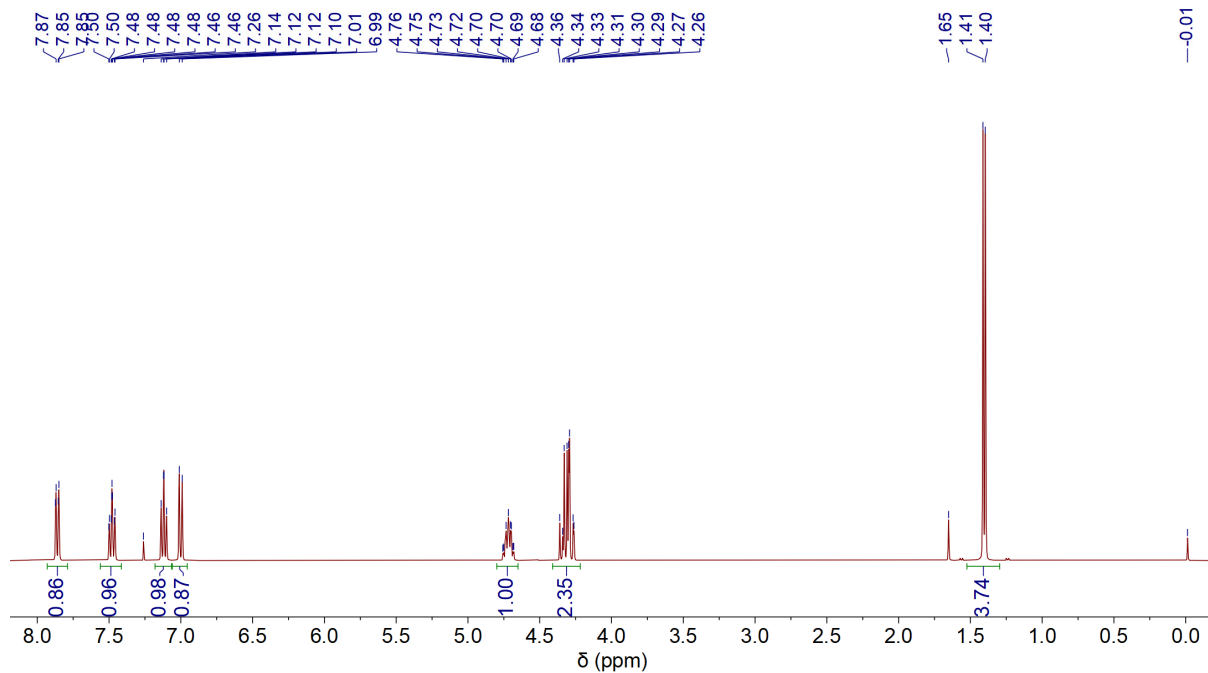

**Fig. S2.**  $^1\text{H}$  NMR ( $\text{CDCl}_3$ , 25  $^\circ\text{C}$ ) spectrum of (*R*)-DHB-Me. Residual solvent peaks at 7.26 ppm and 1.65 ppm for  $\text{CHCl}_3$  and  $\text{H}_2\text{O}$ , respectively.

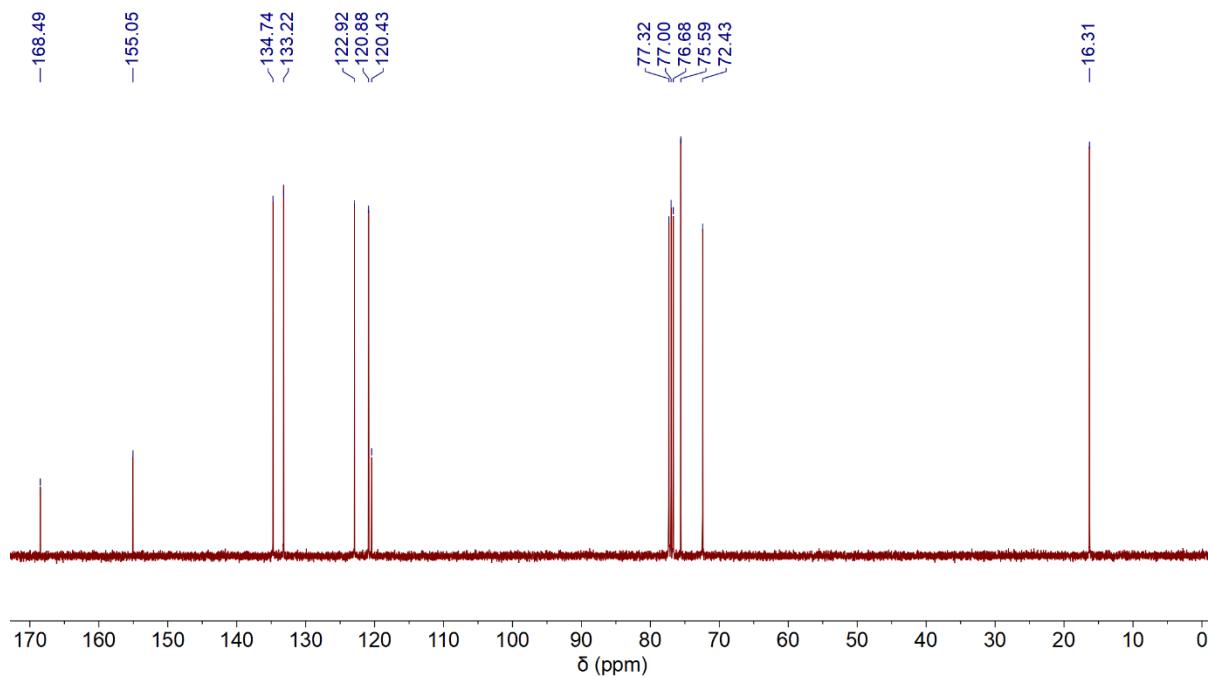

**Fig. S3.**  $^{13}\text{C}$  NMR ( $\text{CDCl}_3$ , 25  $^\circ\text{C}$ ) spectrum of (*R*)-DHB-Me.

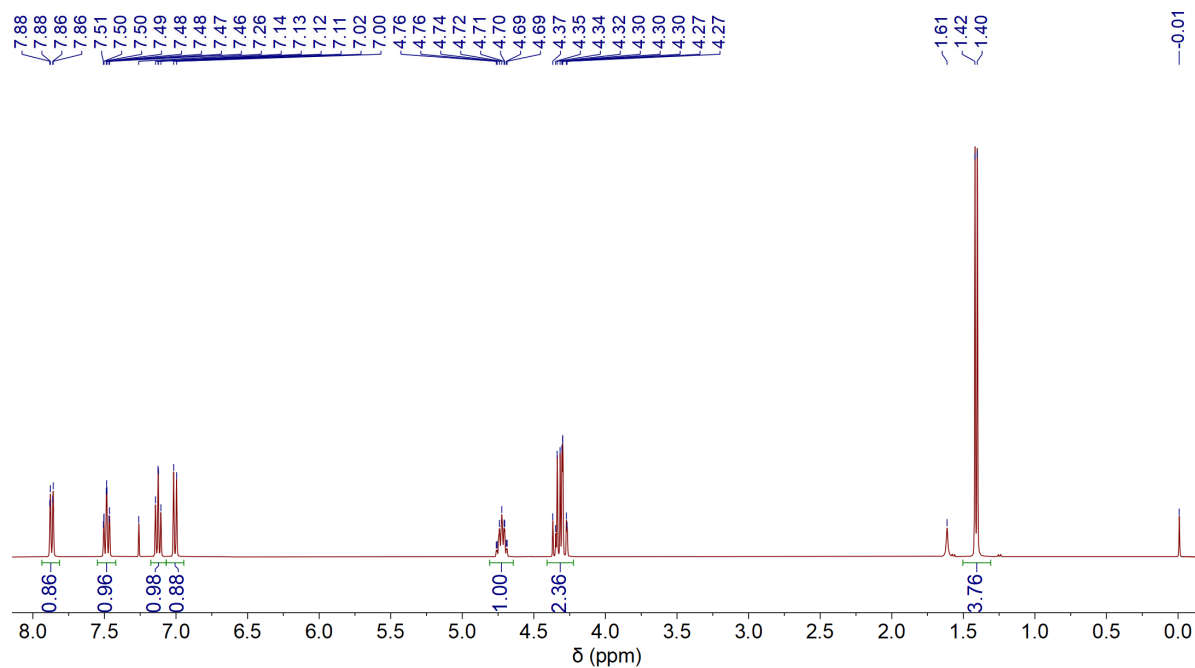

**Fig. S4.**  $^1\text{H}$  NMR ( $\text{CDCl}_3$ , 25  $^\circ\text{C}$ ) spectrum of (*S*)-DHB-Me. Residual solvent peaks at 7.26 ppm and 1.61 ppm for  $\text{CHCl}_3$  and  $\text{H}_2\text{O}$ , respectively.

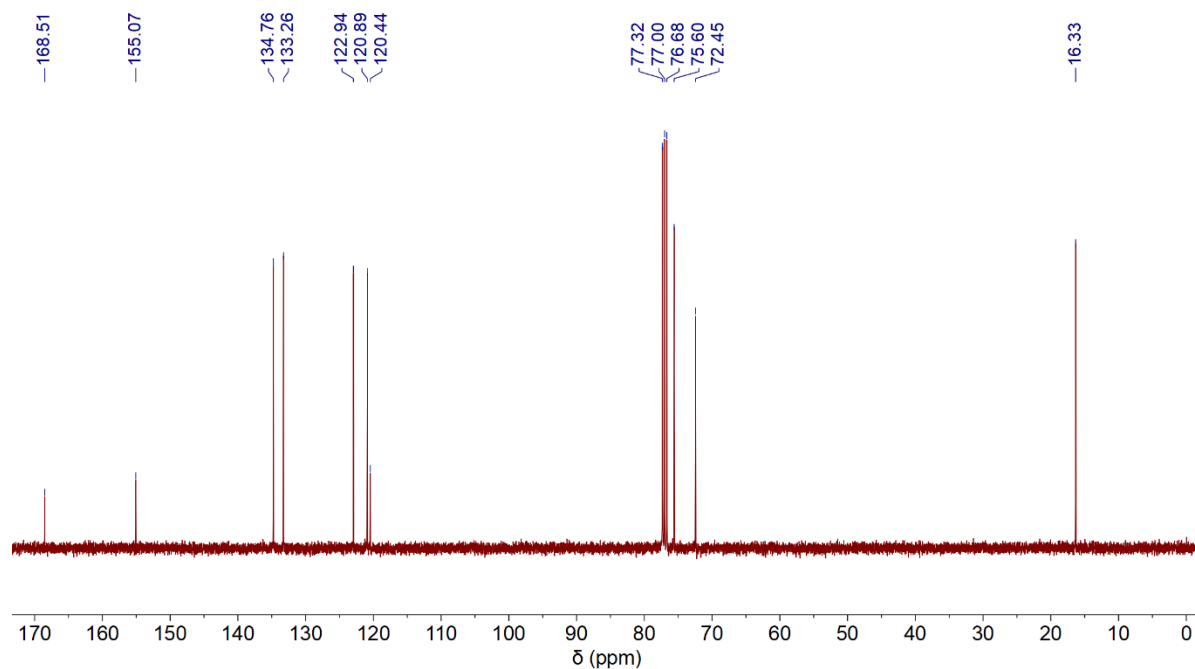

**Fig. S5.**  $^{13}\text{C}$  NMR ( $\text{CDCl}_3$ , 25  $^\circ\text{C}$ ) spectrum of (*S*)-DHB-Me.

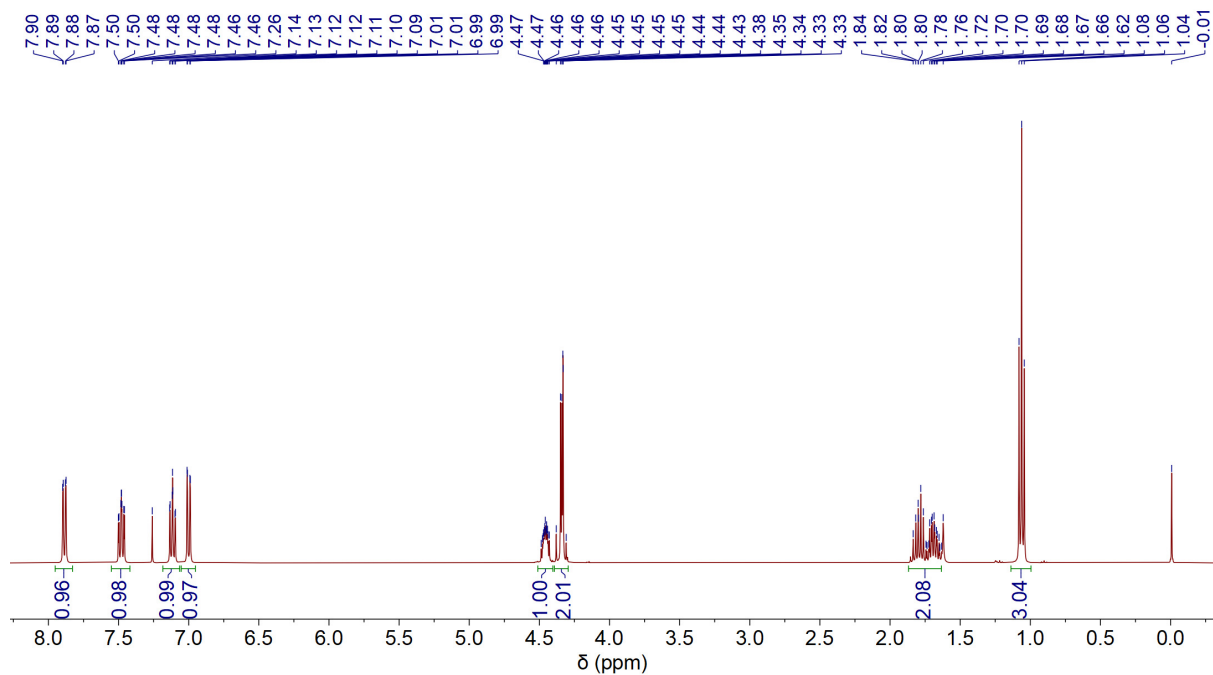

**Fig. S6.**  $^1\text{H}$  NMR ( $\text{CDCl}_3$ , 25  $^\circ\text{C}$ ) spectrum of DHB-Et. Residual solvent peaks at 7.26 ppm and 1.62 ppm for  $\text{CHCl}_3$  and  $\text{H}_2\text{O}$ , respectively.

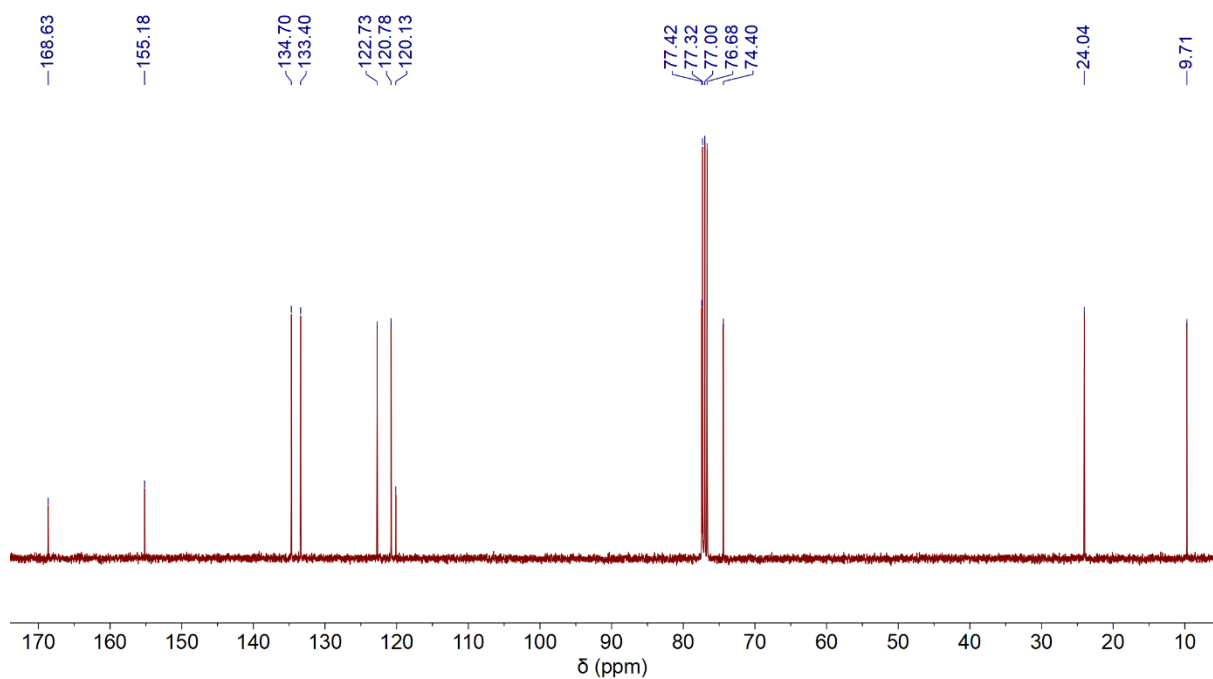

**Fig. S7.**  $^{13}\text{C}$  NMR ( $\text{CDCl}_3$ , 25  $^\circ\text{C}$ ) spectrum of DHB-Et.

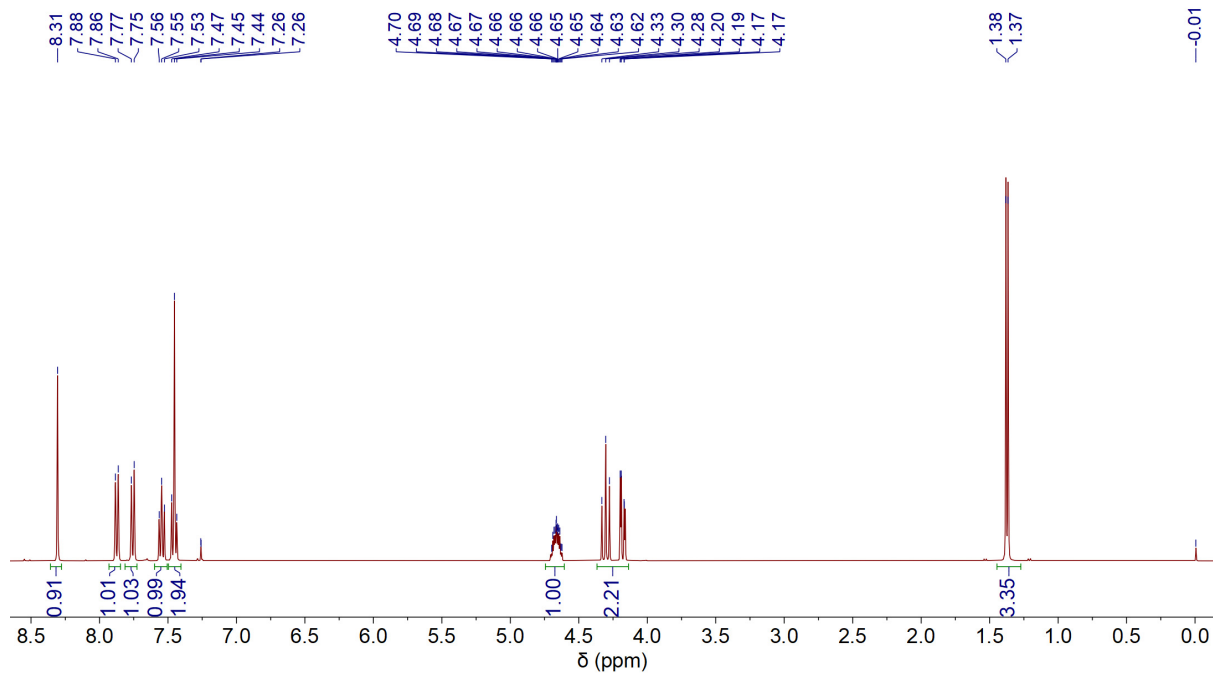

**Fig. S8.**  $^1\text{H}$  NMR ( $\text{CDCl}_3$ , 25  $^\circ\text{C}$ ) spectrum of DHN-Me. Residual solvent peaks at 7.26 ppm for  $\text{CHCl}_3$ .

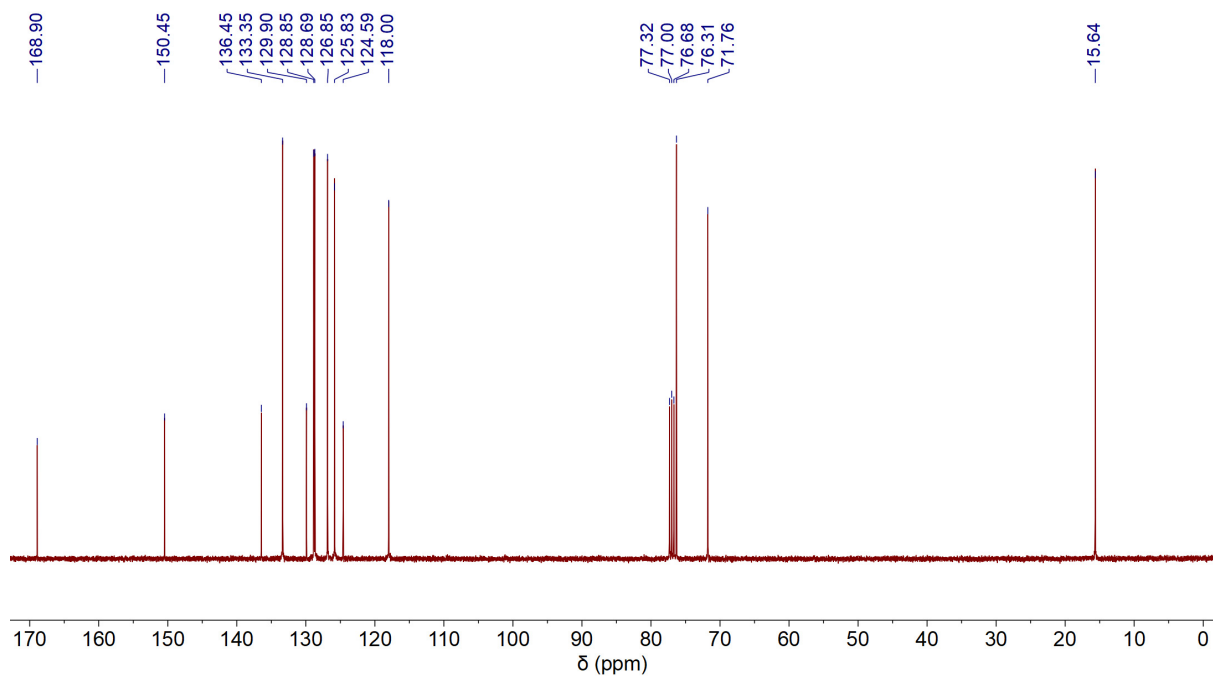

**Fig. S9.**  $^{13}\text{C}$  NMR ( $\text{CDCl}_3$ , 25  $^\circ\text{C}$ ) spectrum of DHN-Me.

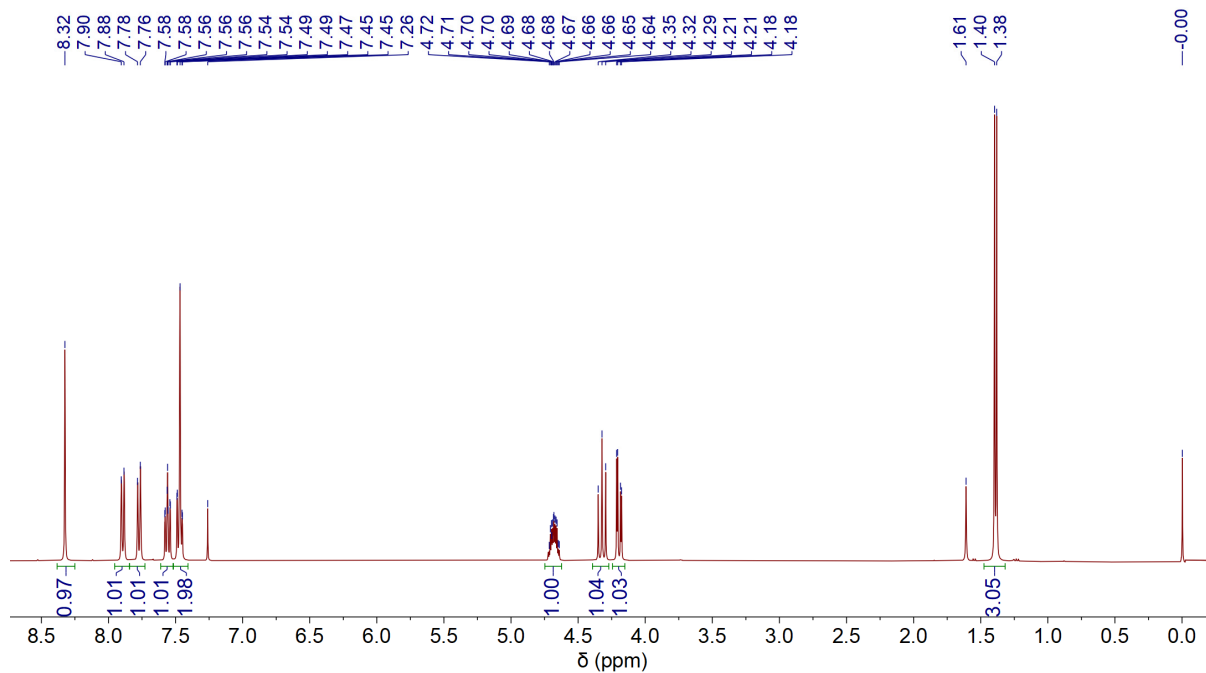

**Fig. S10.**  $^1\text{H}$  NMR ( $\text{CDCl}_3$ , 25  $^\circ\text{C}$ ) spectrum of (*R*)-DHN-Me. Residual solvent peaks at 7.26 ppm and 1.61 ppm for  $\text{CHCl}_3$  and  $\text{H}_2\text{O}$ , respectively.

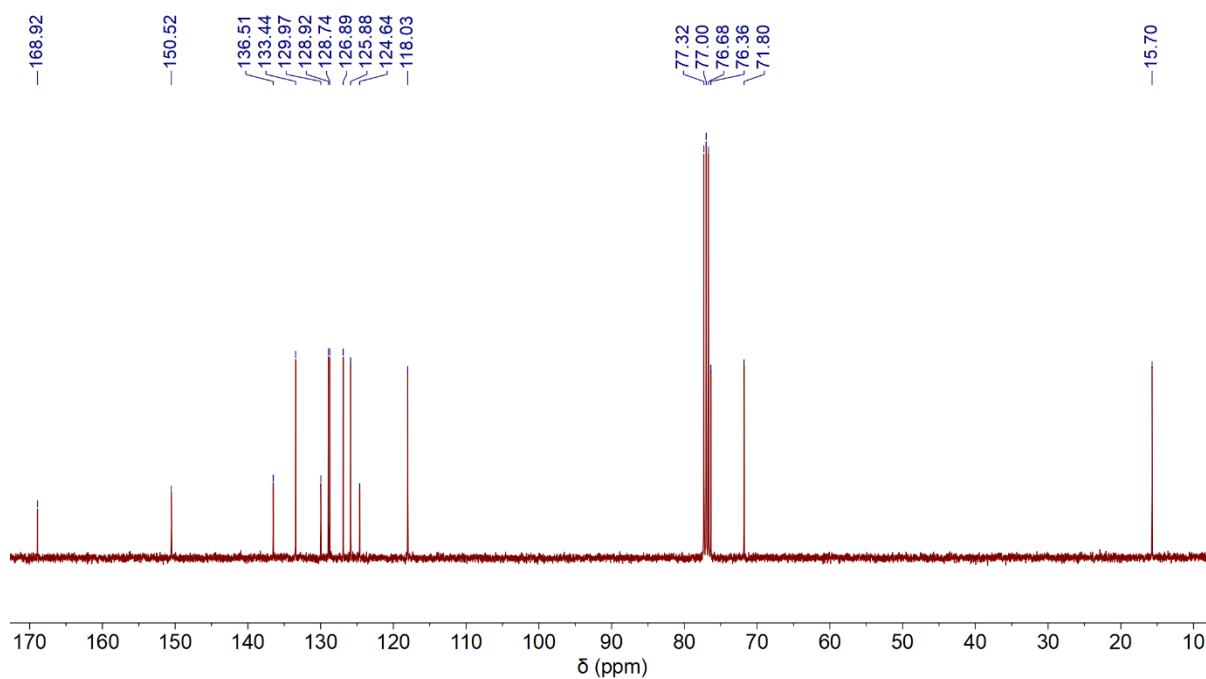

**Fig. S11.**  $^{13}\text{C}$  NMR ( $\text{CDCl}_3$ , 25  $^\circ\text{C}$ ) spectrum of (*R*)-DHN-Me.

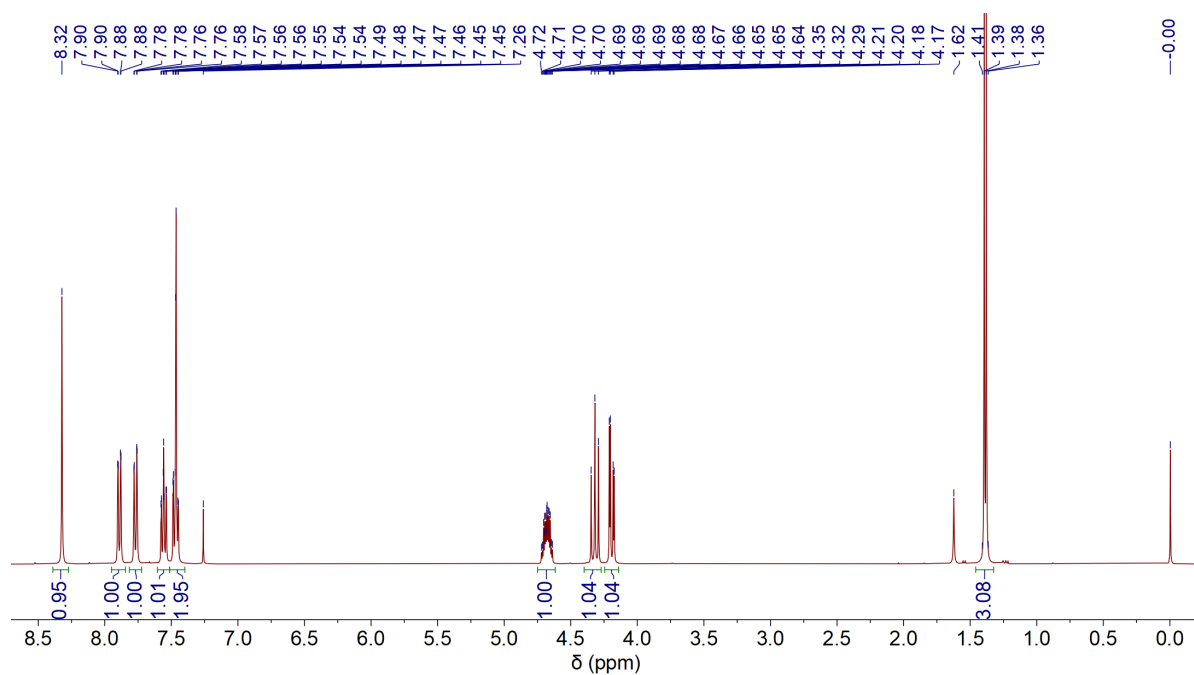

**Fig. S12.**  $^1\text{H}$  NMR ( $\text{CDCl}_3$ , 25 °C) spectrum of (*S*)-DHN-Me. Residual solvent peaks at 7.26 ppm and 1.62 ppm for  $\text{CHCl}_3$  and  $\text{H}_2\text{O}$ , respectively.

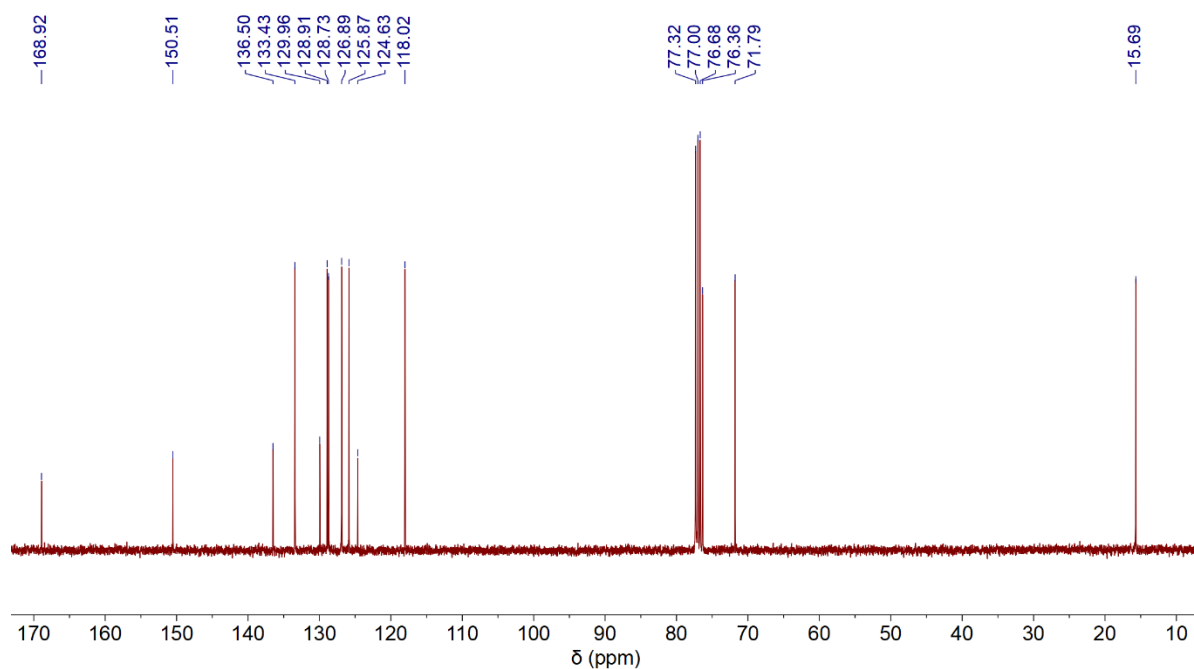

**Fig. S13.**  $^{13}\text{C}$  NMR ( $\text{CDCl}_3$ , 25 °C) spectrum of (*S*)-DHN-Me.



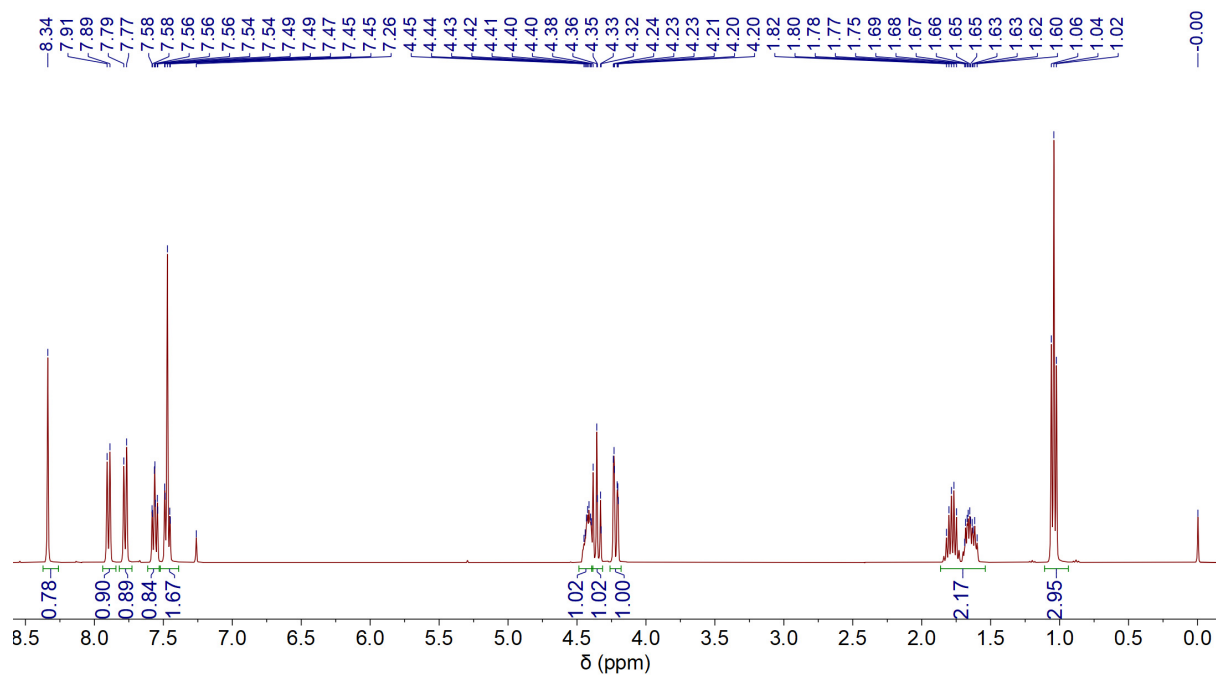

**Fig. S14.**  $^1\text{H}$  NMR ( $\text{CDCl}_3$ , 25 °C) spectrum of DHN-Et. Residual solvent peak at 7.26 ppm for  $\text{CHCl}_3$ .

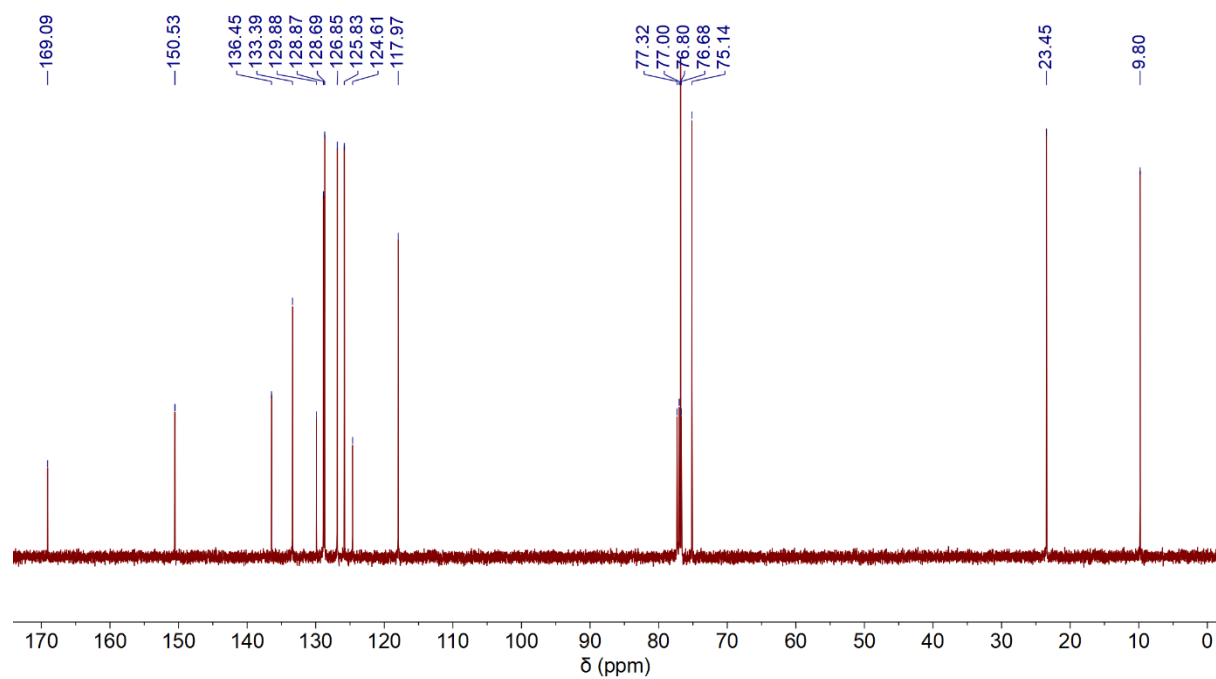

**Fig. S15.**  $^{13}\text{C}$  NMR ( $\text{CDCl}_3$ , 25 °C) spectrum of DHN-Et.

## General Polymerization Procedures

Note: Prior to polymerization, DHB-Me, (*R*)-DHB-Me and DHB-Et were further purified via recrystallization from ethanol and sublimation at 100 °C twice. DHN-Me, (*R*)-DHN-Me and DHN-Et were further purified via recrystallization from ethanol twice, dried in a vacuum oven at 60 °C for 24 h and washed with extra dry *n*-hexane in glovebox.

Polymerizations were performed in 4 mL vials at 70 °C or 100 °C inside the glovebox, or in 25 mL Schlenk flasks interfaced to a dual-manifold Schlenk line with oil bath for runs. As for DHB-Me and DHB-Et, the catalyst was added to the vigorously stirred prepared monomer and initiator (*p*-tolylmethanol) under bulk condition. As for DHN-Me and DHN-Et, the solution of catalyst in toluene was added to the vigorously stirred prepared monomer and initiator (*p*-tolylmethanol) solution (toluene). After a desired period of time, the polymerization was quenched by addition of 0.5 mL CHCl<sub>3</sub> containing benzoic acid (1 wt %). The quenched mixture was dissolved in CHCl<sub>3</sub> and precipitated into 100 mL of cold methanol, filtered, and washed with cold methanol; then the polymer was dissolved in CHCl<sub>3</sub> and precipitated into 100 mL cold *n*-hexane to ensure any catalyst residue or unreacted monomer was removed. All polymers were dried in a vacuum oven at 60 °C to a constant weight.

**Table S1.** Results for the copolymerization of DHB-Me and DHB-Et.<sup>a</sup>

| Entry | [DHB-Me]/[DHB-Et]/[ZnI]/[I] | Conv. <sup>b</sup> (%) |        | DHB-Me content <sup>b</sup> (%) | $M_n^c$ (kDa) | $D^c$ | $T_g^d$ (°C) | $T_d^e$ (°C) |
|-------|-----------------------------|------------------------|--------|---------------------------------|---------------|-------|--------------|--------------|
|       |                             | DHB-Me                 | DHB-Et |                                 |               |       |              |              |
| 1     | 50:1000:1:1                 | 76                     | 58     | 7                               | 57.5          | 1.13  | 50           | 342          |

<sup>a</sup>Reaction conditions: Initiator (I) = *p*-tolylmethanol, bulk condition, 70 °C, reaction time = 6 h. <sup>b</sup>Monomer conversion measured by <sup>1</sup>H NMR of the quenched solution, DHB-Me content measured by <sup>1</sup>H NMR of resulting polymers. <sup>c</sup>Number-average molecular weight ( $M_n$ ) and dispersity index ( $D = M_w/M_n$ ) determined by SEC at 40 °C in THF. <sup>d</sup> $T_g$  measured by differential scanning calorimetry (DSC) from the second heating-scan curves with the cooling and second heating rate of 10 °C min<sup>-1</sup>. <sup>e</sup> $T_d$  measured by thermal gravimetric analysis (TGA) at a heating rate of 10 °C min<sup>-1</sup>.

## Polymer Characterizations

P(DHB-Me):

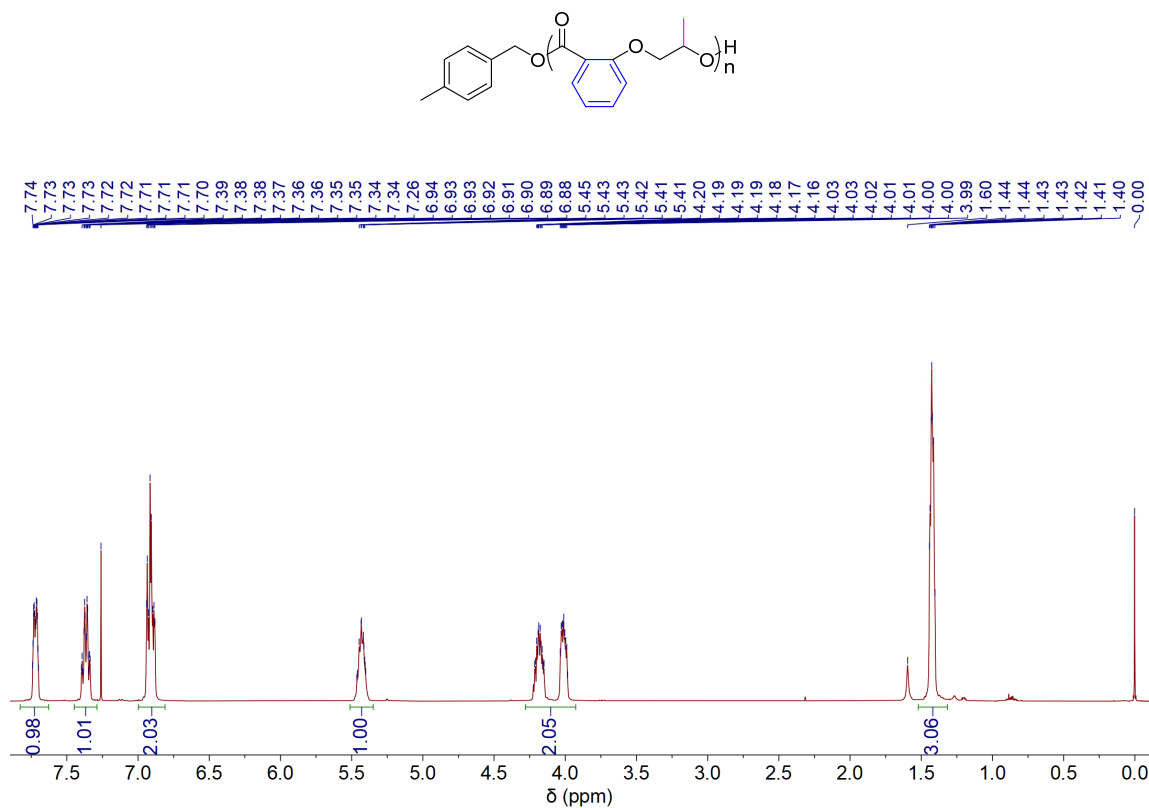

**Fig. S16.** <sup>1</sup>H NMR (CDCl<sub>3</sub>, 25 °C) spectrum of P(DHB-Me) obtained by [DHB-Me]/[TBD]/[I] = 100/1/1.

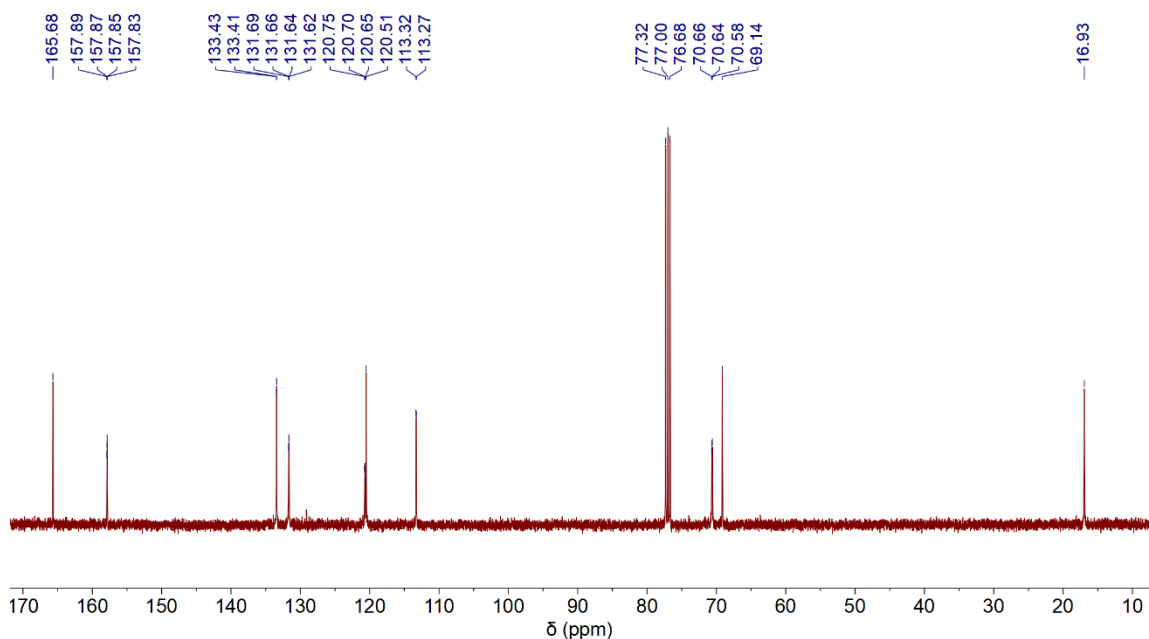

**Fig. S17.** <sup>13</sup>C NMR (CDCl<sub>3</sub>, 25 °C) spectrum of P(DHB-Me) obtained by [DHB-Me]/[TBD]/[I] = 100/1/1.

P[(*R*)-DHB-Me]:

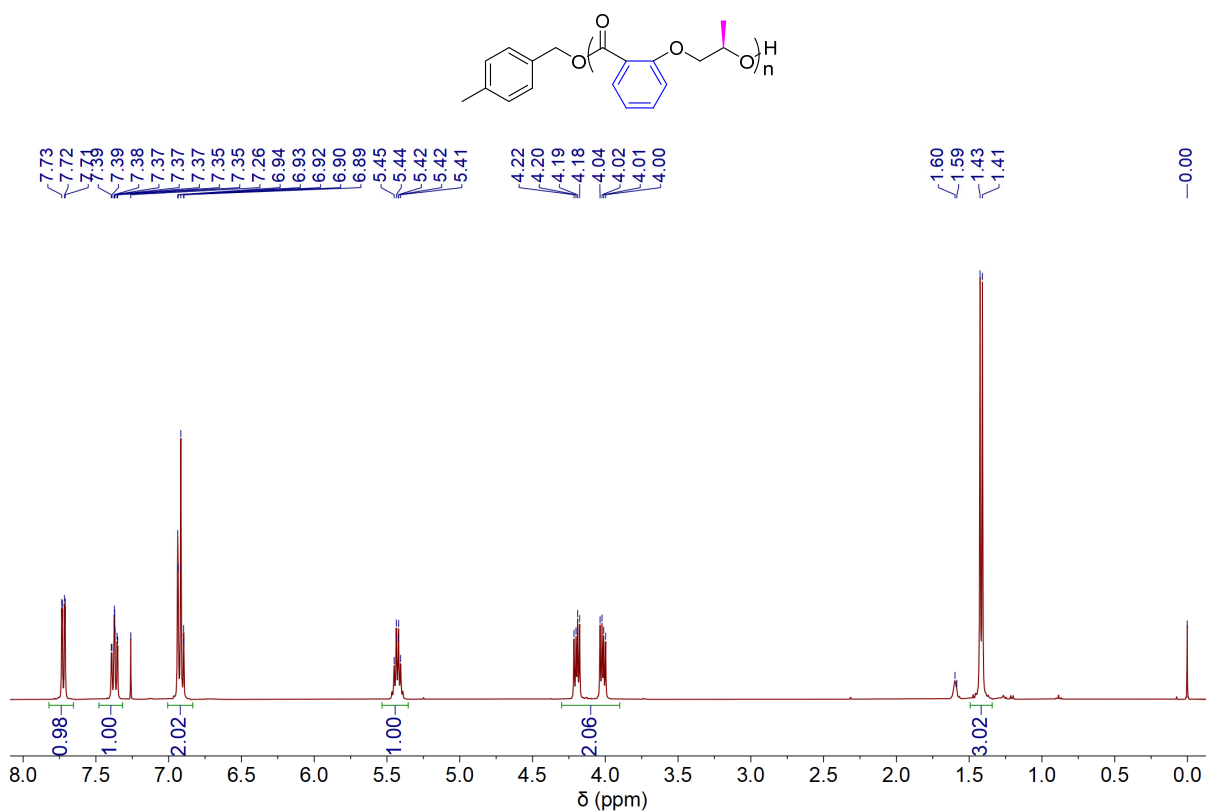

**Fig. S18.** <sup>1</sup>H NMR (CDCl<sub>3</sub>, 25 °C) spectrum of P[(*R*)-DHB-Me] obtained by [(*R*)-DHB-Me]/[Zn1]/[I] = 500/1/1.

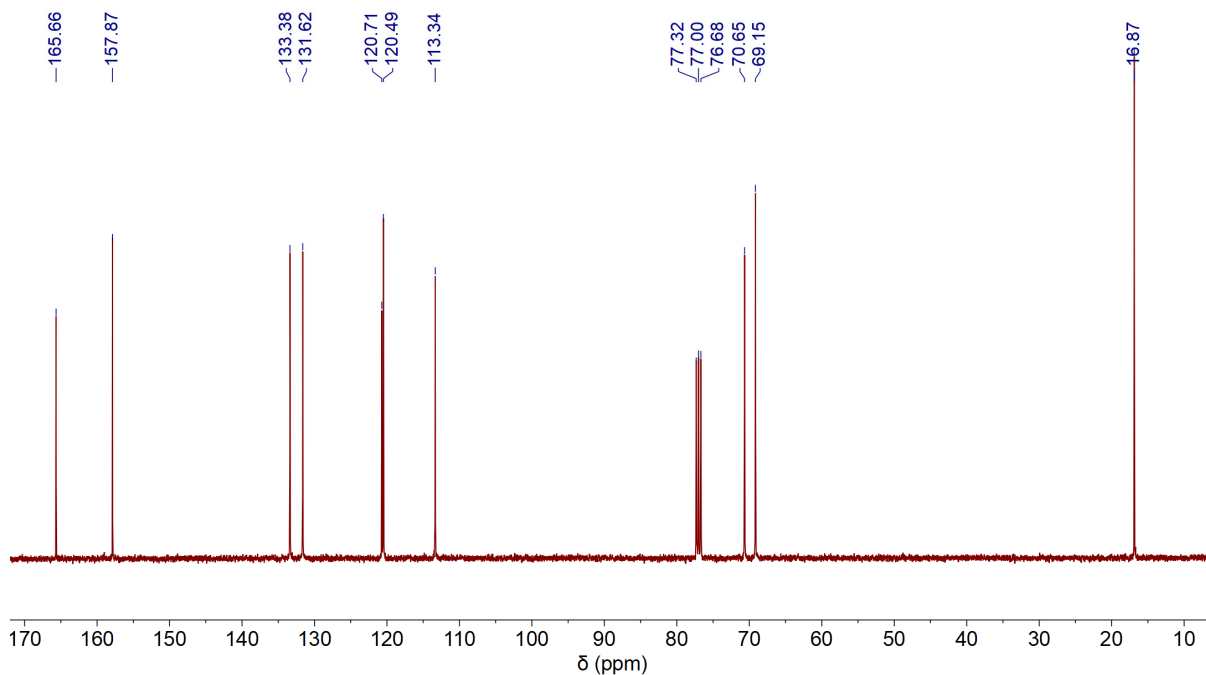

**Fig. S19.** <sup>13</sup>C NMR (CDCl<sub>3</sub>, 25 °C) spectrum of P[(*R*)-DHB-Me] obtained by [(*R*)-DHB-Me]/[Zn1]/[I] = 500/1/1.

P[(S)-DHB-Me]:

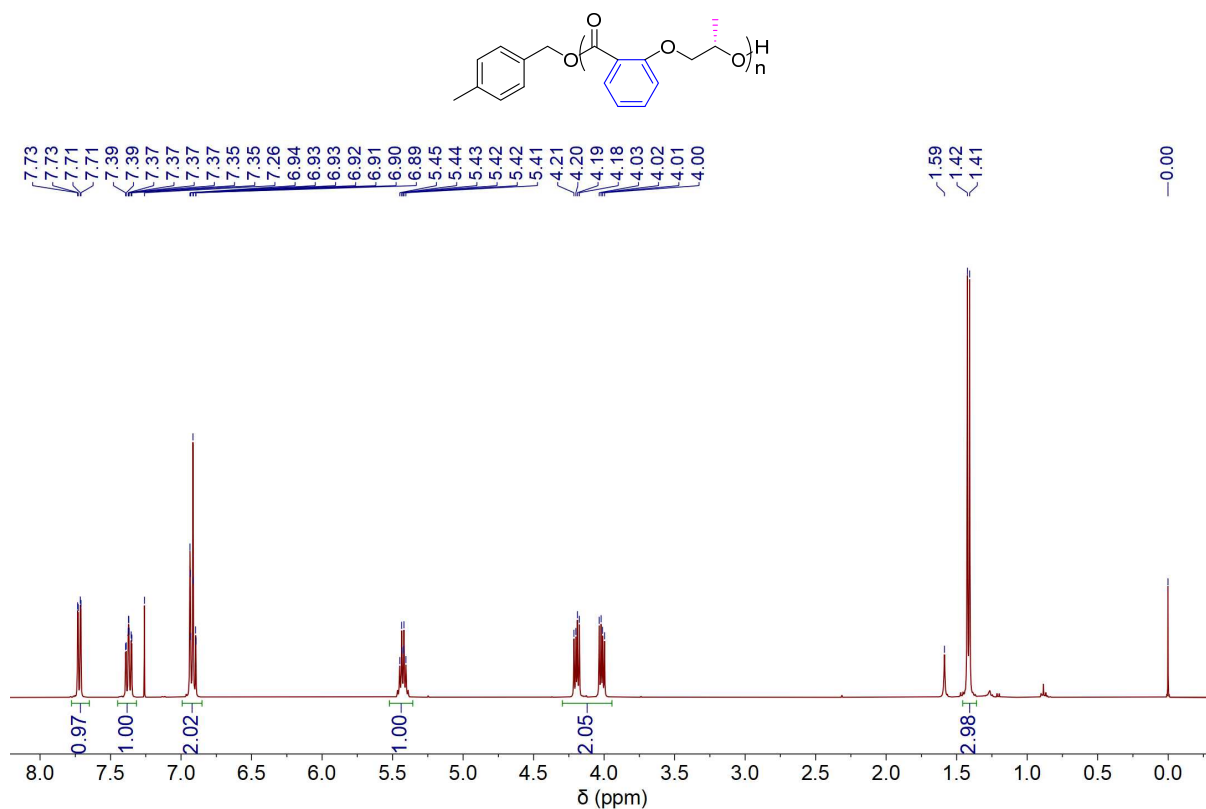

**Fig. S20.** <sup>1</sup>H NMR (CDCl<sub>3</sub>, 25 °C) spectrum of P[(S)-DHB-Me] obtained by [(S)-DHB-Me]/[TBD]/[I] = 500/1/1.

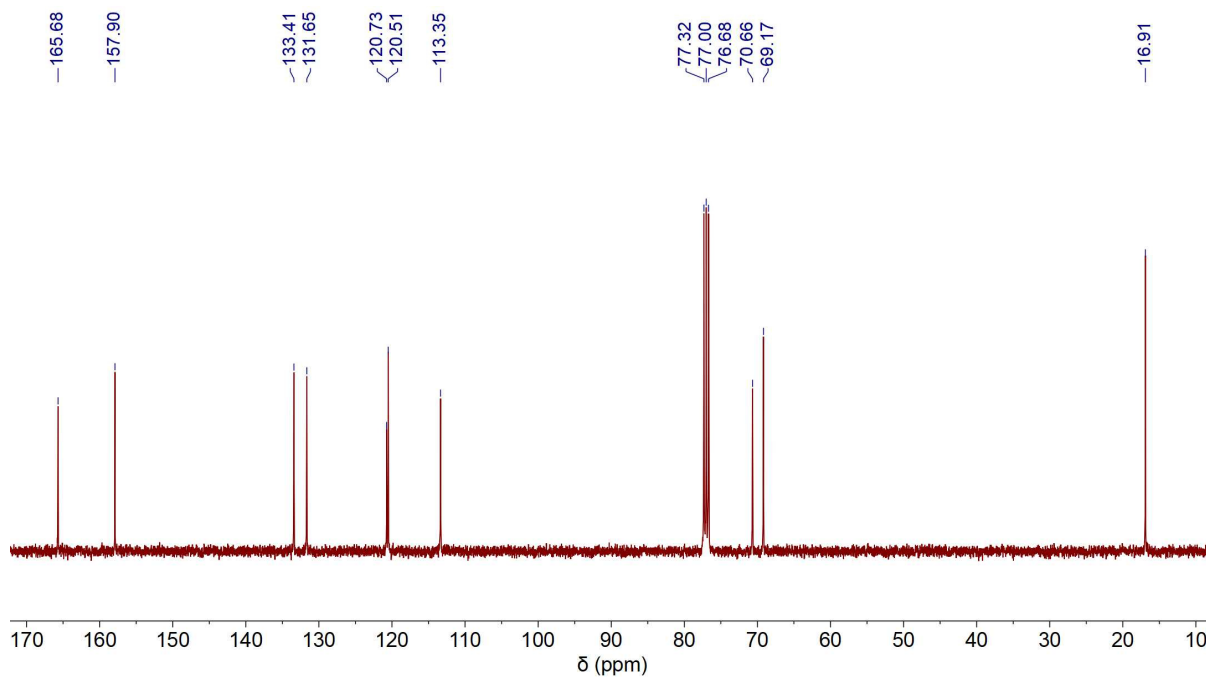

**Fig. S21.** <sup>13</sup>C NMR (CDCl<sub>3</sub>, 25 °C) spectrum of P[(S)-DHB-Me] obtained by [(S)-DHB-Me]/[TBD]/[I] = 500/1/1.

P(DHB-Et):

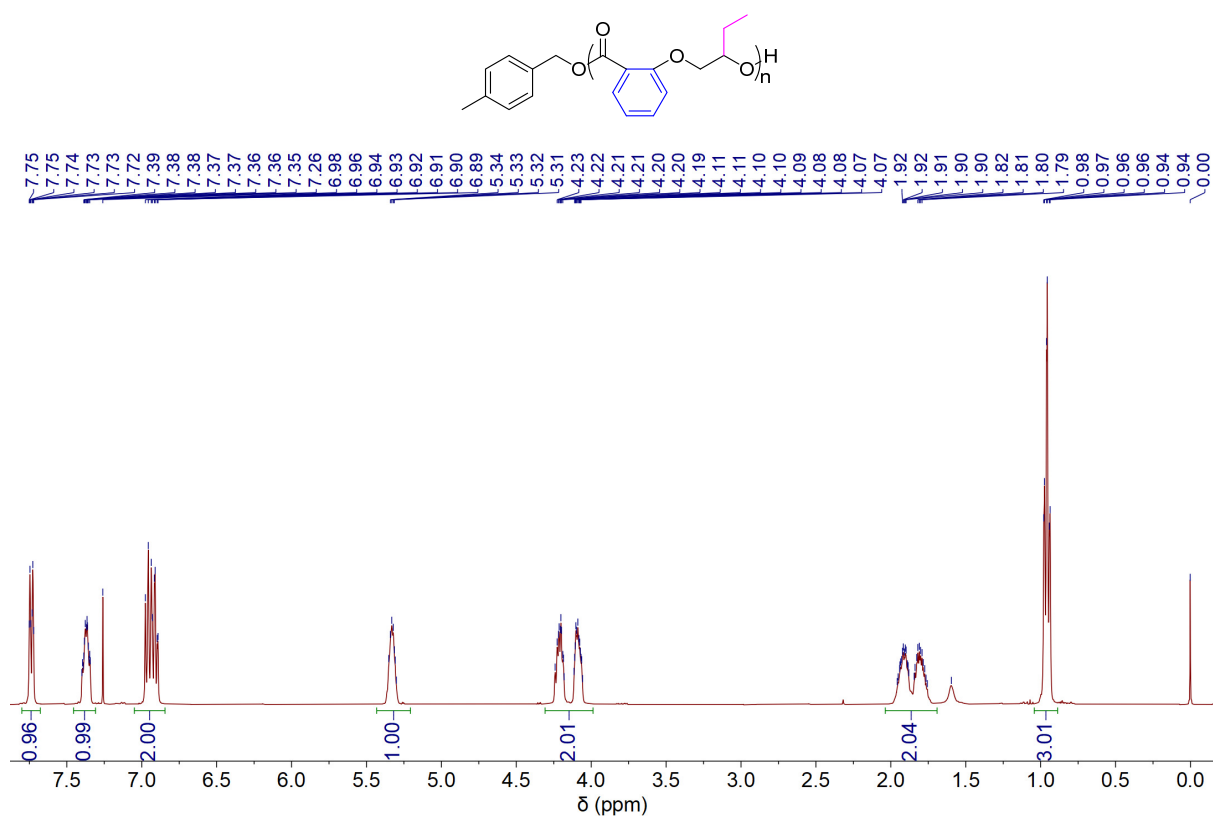

**Fig. S22.** <sup>1</sup>H NMR (CDCl<sub>3</sub>, 25 °C) spectrum of P(DHB-Et) obtained by [DHB-Et]/[TBD]/[I] = 500/1/1.

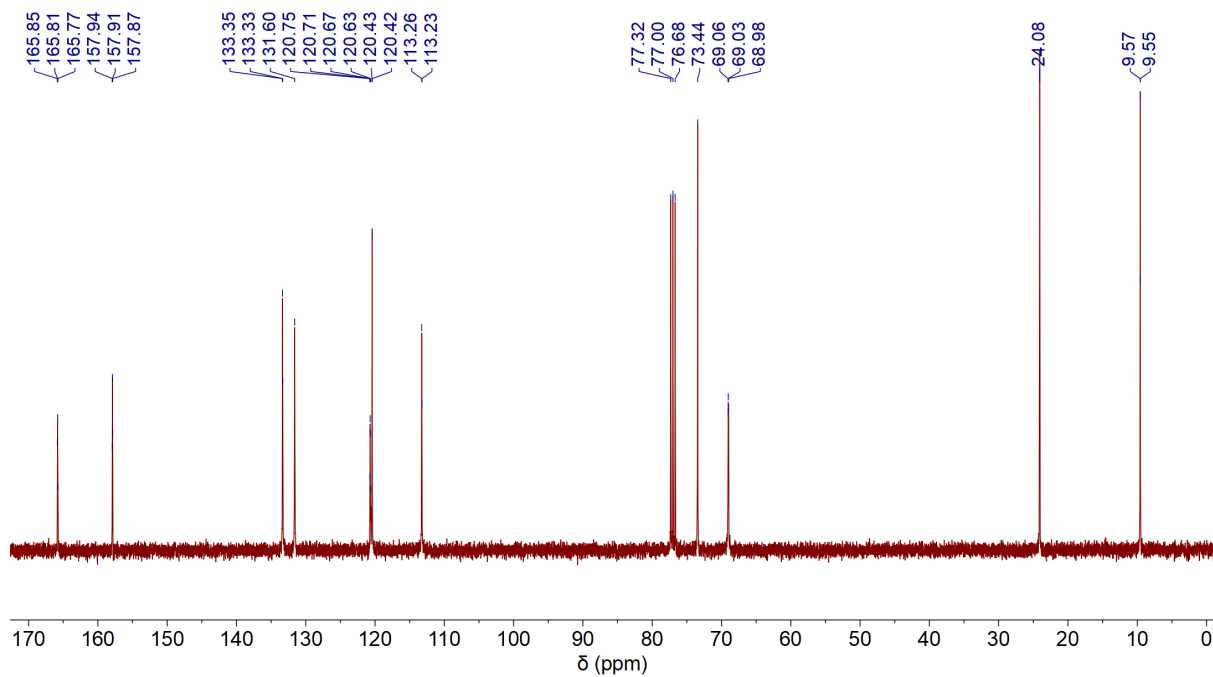

**Fig. S23.** <sup>13</sup>C NMR (CDCl<sub>3</sub>, 25 °C) spectrum of P(DHB-Et) obtained by [DHB-Et]/[TBD]/[I] = 500/1/1.

P(DHN-Me):

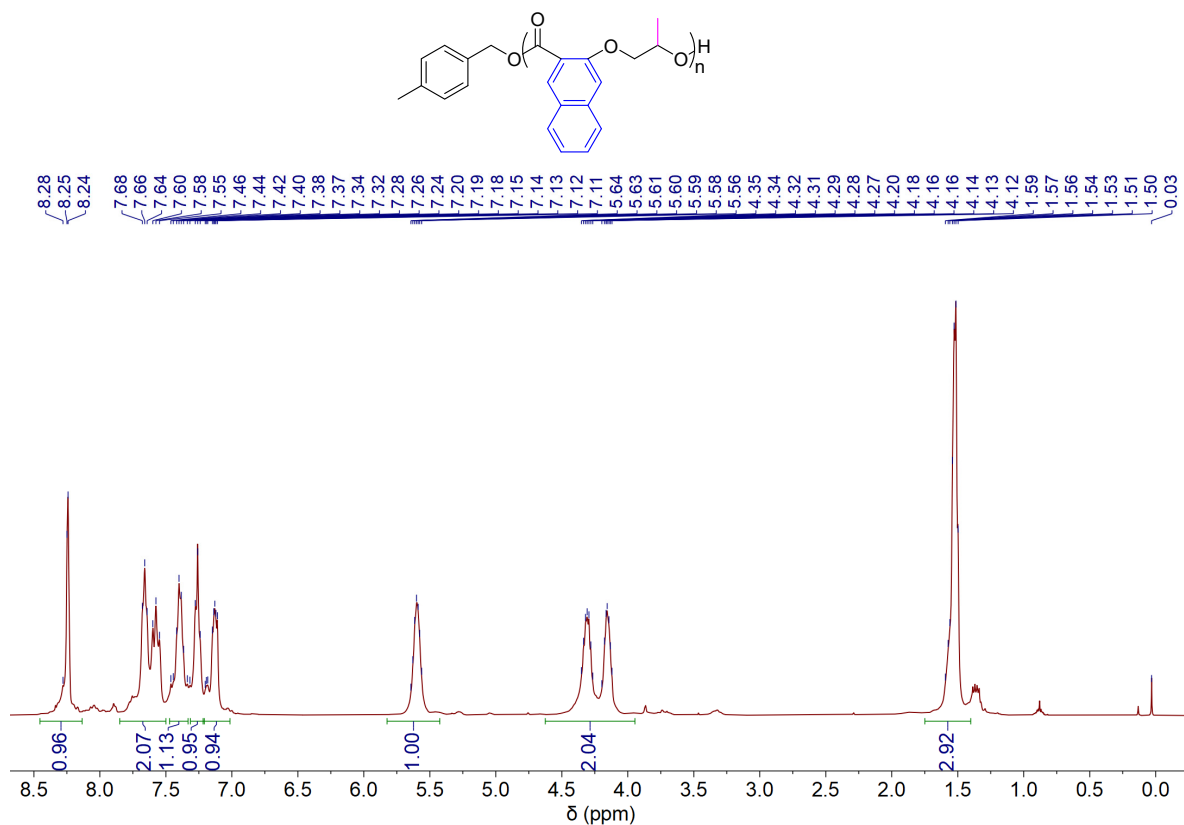

**Fig. S24.**  $^1\text{H}$  NMR ( $\text{CDCl}_3$ , 25 °C) spectrum of P(DHN-Me) obtained by  $[\text{DHN-Me}]/[\text{Zn1}]/[\text{I}] = 1000/1/1$ .

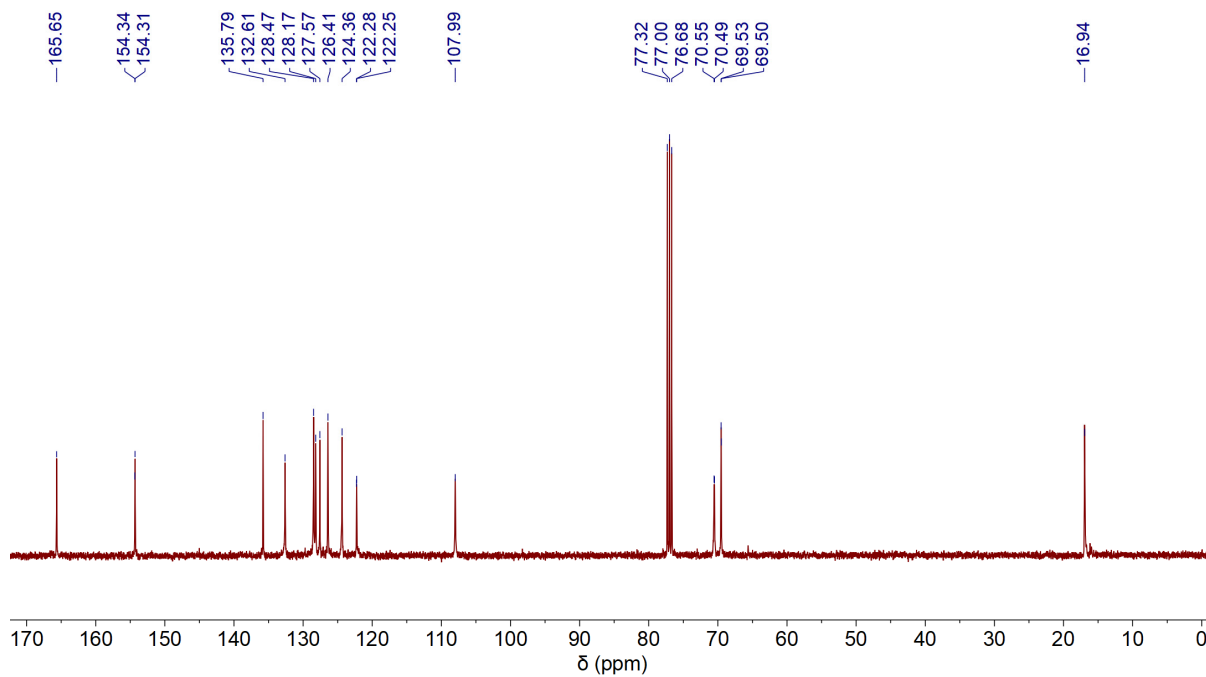

**Fig. S25.**  $^{13}\text{C}$  NMR ( $\text{CDCl}_3$ , 25 °C) spectrum of P(DHN-Me) obtained by  $[\text{DHN-Me}]/[\text{Zn1}]/[\text{I}] = 1000/1/1$ .

P[(*R*)-DHN-Me]:

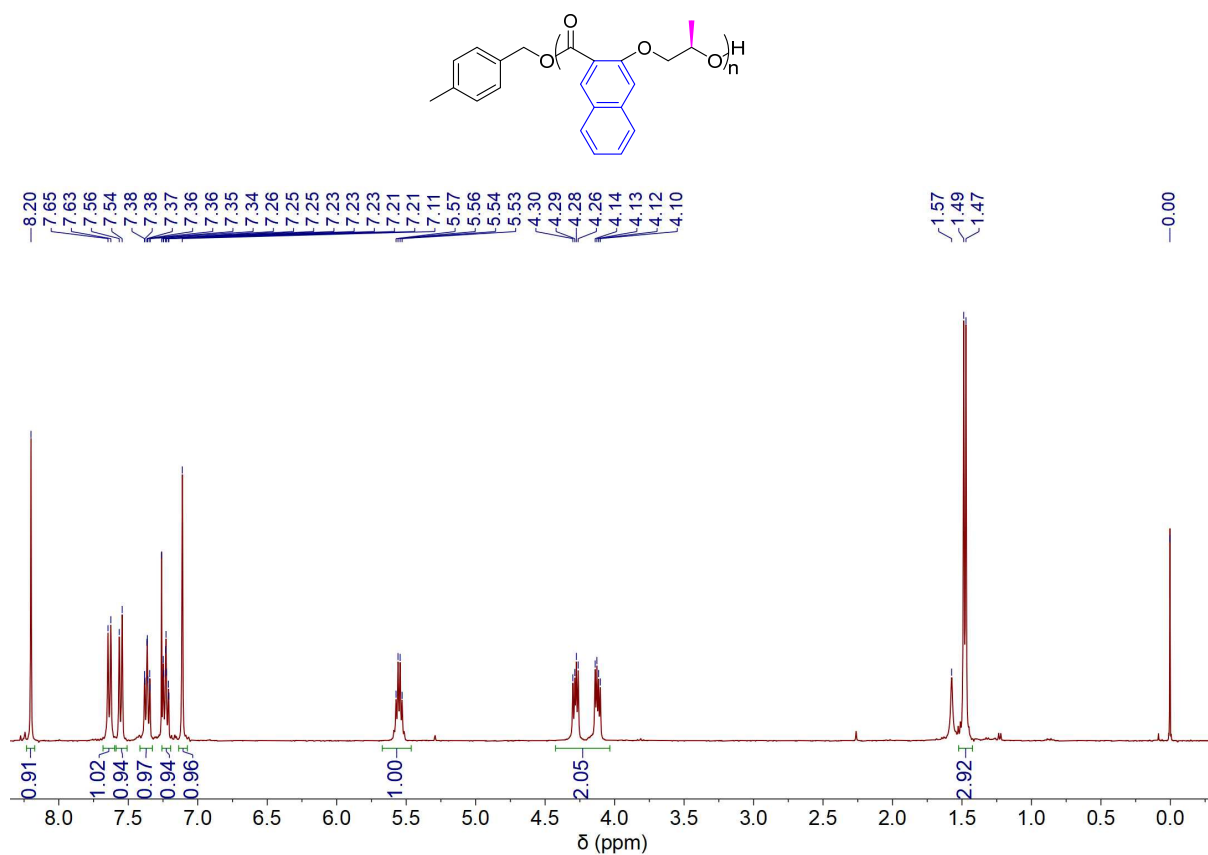

**Fig. S26.** <sup>1</sup>H NMR (CDCl<sub>3</sub>, 25 °C) spectrum of P[(*R*)-DHN-Me] obtained by [(*R*)-DHN-Me]/[Zn1]/[I] = 100/1/1.

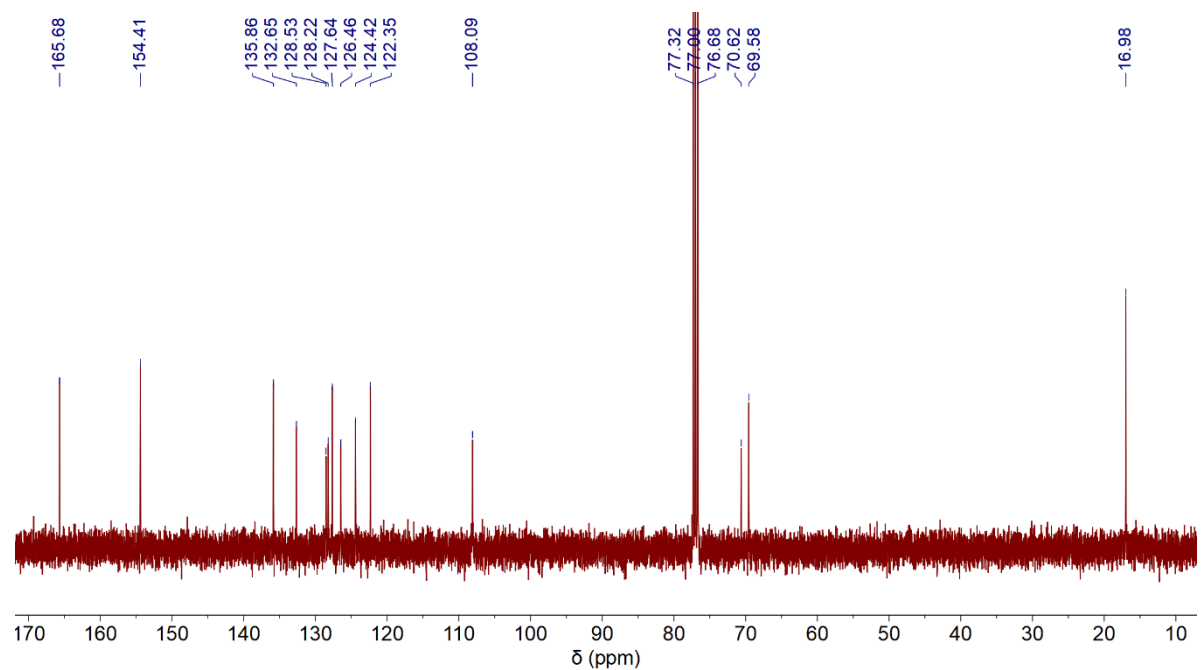

**Fig. S27.** <sup>13</sup>C NMR (CDCl<sub>3</sub>, 25 °C) spectrum of P[(*R*)-DHN-Me] obtained by [(*R*)-DHN-Me]/[Zn1]/[I] = 100/1/1.



P[(S)-DHN-Me]:

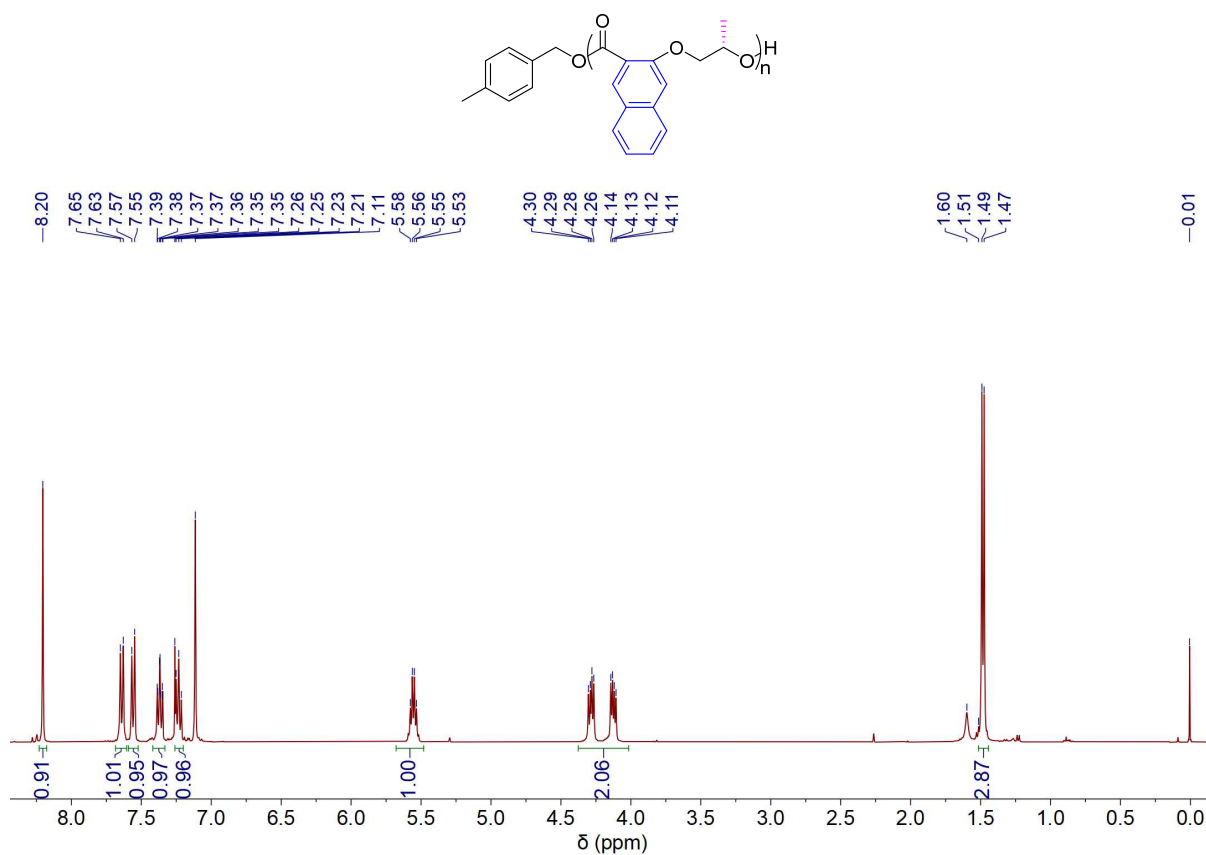

**Fig. S28.** <sup>1</sup>H NMR (CDCl<sub>3</sub>, 25 °C) spectrum of P[(S)-DHN-Me] obtained by [(S)-DHN-Me]/[Zn1]/[I] = 100/1/1.

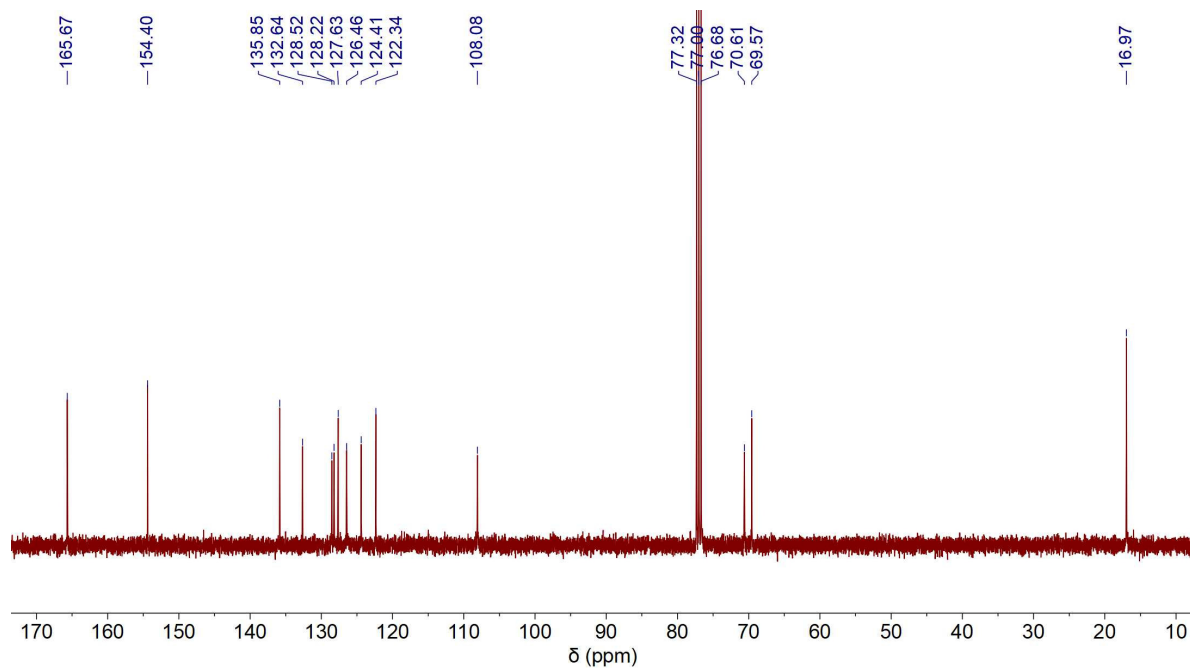

**Fig. S29.** <sup>13</sup>C NMR (CDCl<sub>3</sub>, 25 °C) spectrum of P[(S)-DHN-Me] obtained by [(S)-DHN-Me]/[Zn1]/[I] = 100/1/1.

P(DHN-Et):

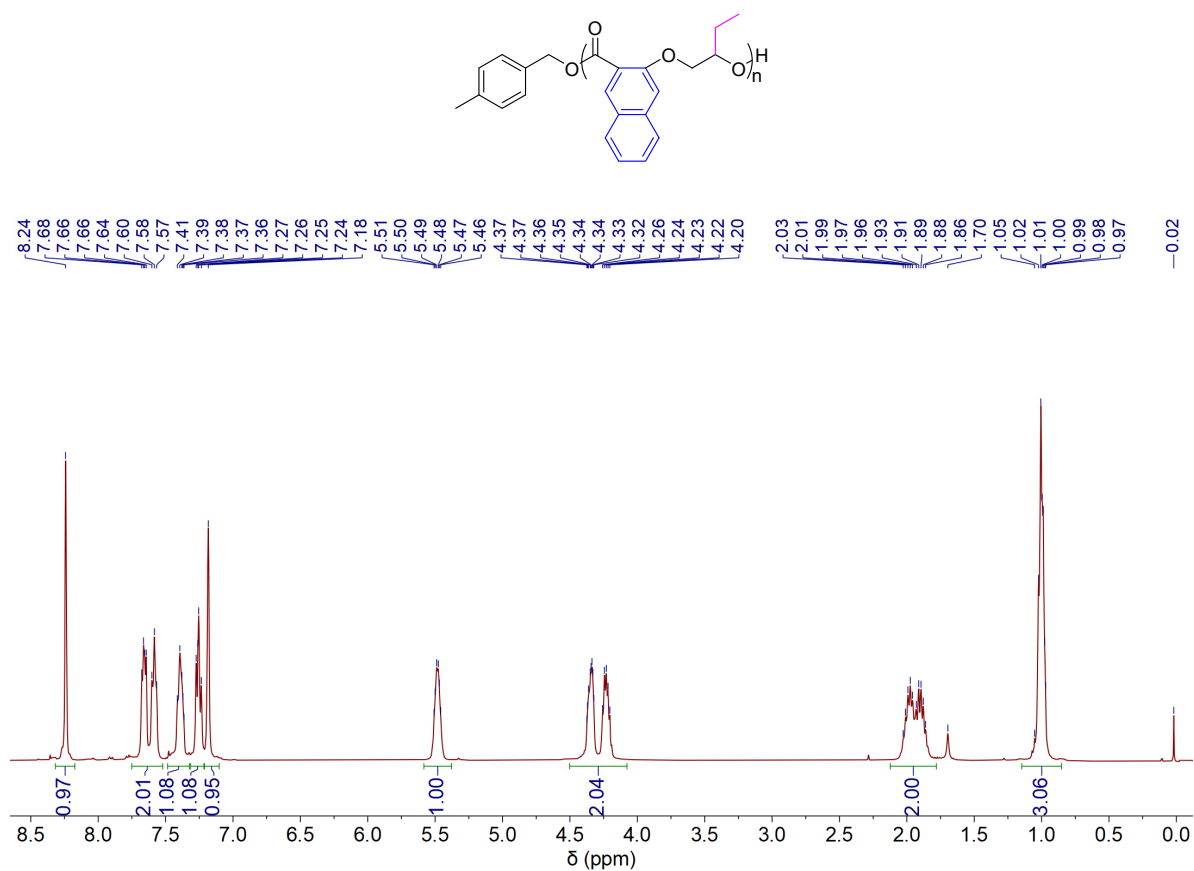

**Fig. S30.**  $^1\text{H}$  NMR ( $\text{CDCl}_3$ , 25  $^\circ\text{C}$ ) spectrum of P(DHN-Et) obtained by  $[\text{DHN-Et}]/[\text{Zn1}]/[\text{I}] = 500/1/1$ .

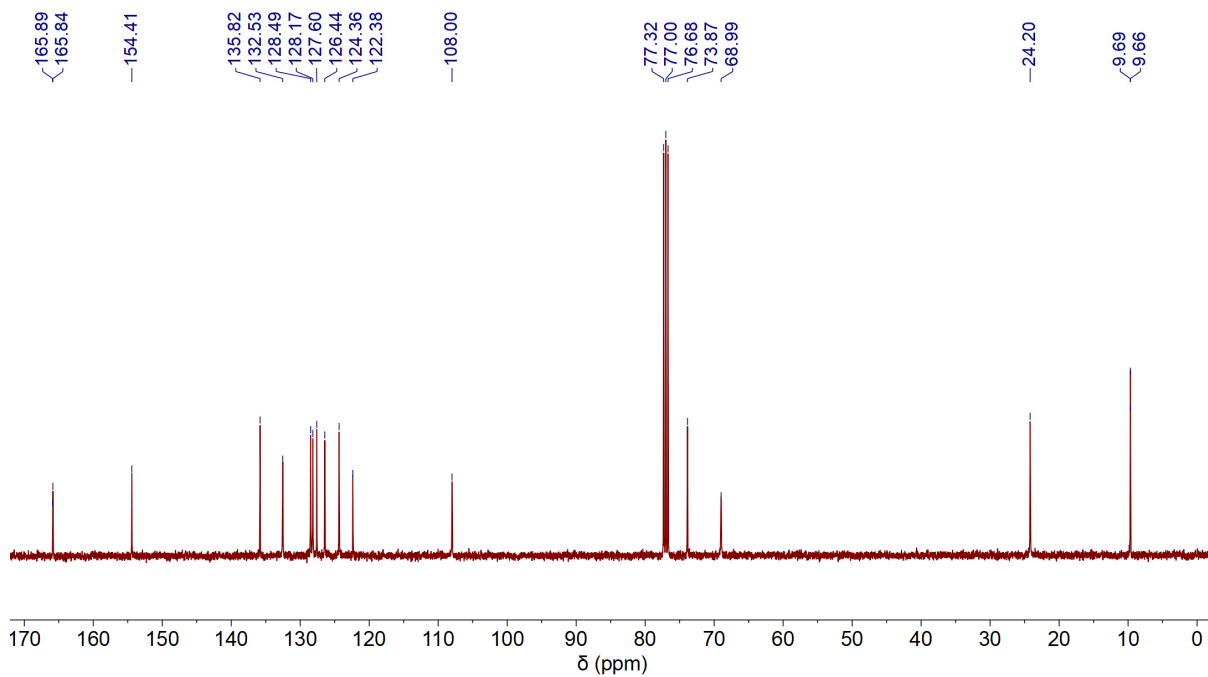

**Fig. S31.**  $^{13}\text{C}$  NMR ( $\text{CDCl}_3$ , 25  $^\circ\text{C}$ ) spectrum of P(DHN-Et) obtained by  $[\text{DHN-Et}]/[\text{Zn1}]/[\text{I}] = 500/1/1$ .

P(DHB-Me-co-DHB-Et):

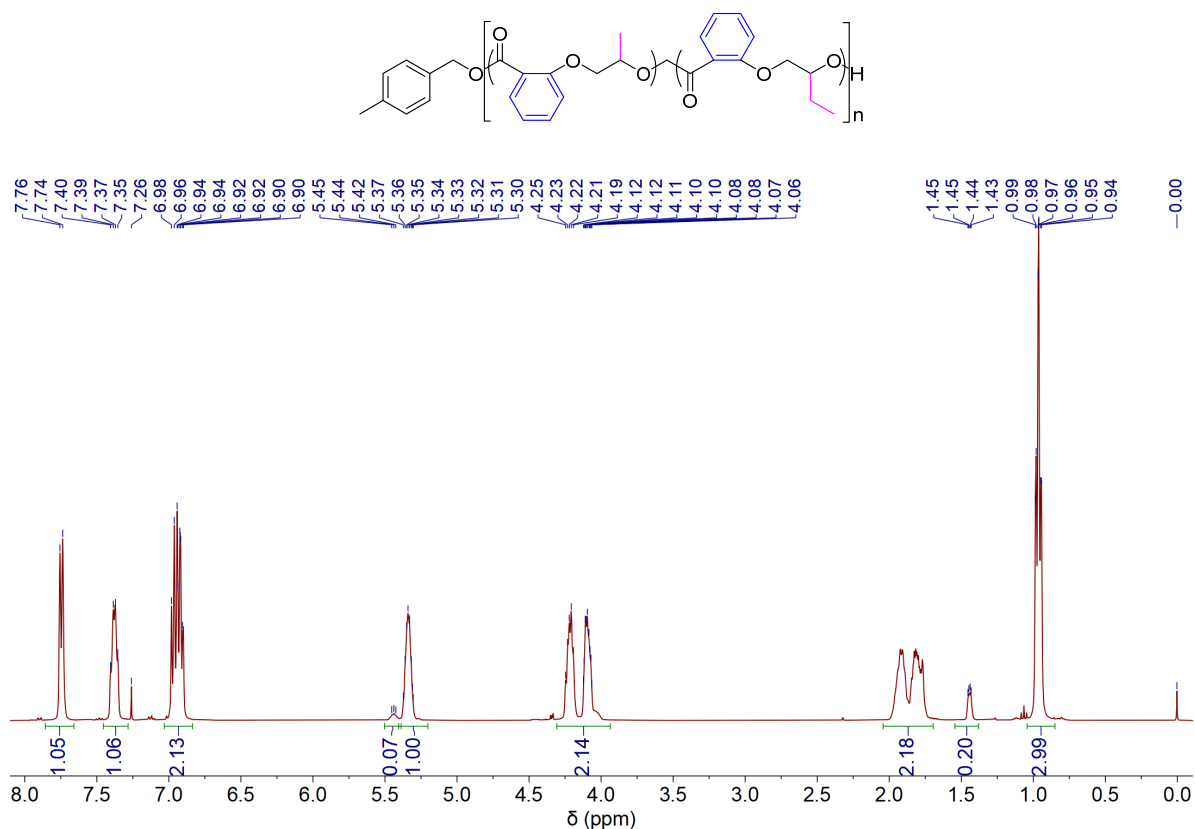

**Fig. S32.**  $^1\text{H}$  NMR ( $\text{CDCl}_3$ , 25 °C) spectrum of P(DHB-Me-co-DHB-Et) obtained by  $[\text{DHB-Me}]/[\text{DHB-Et}]/[\text{Zn1}]/[\text{I}] = 50/1000/1/1$ .

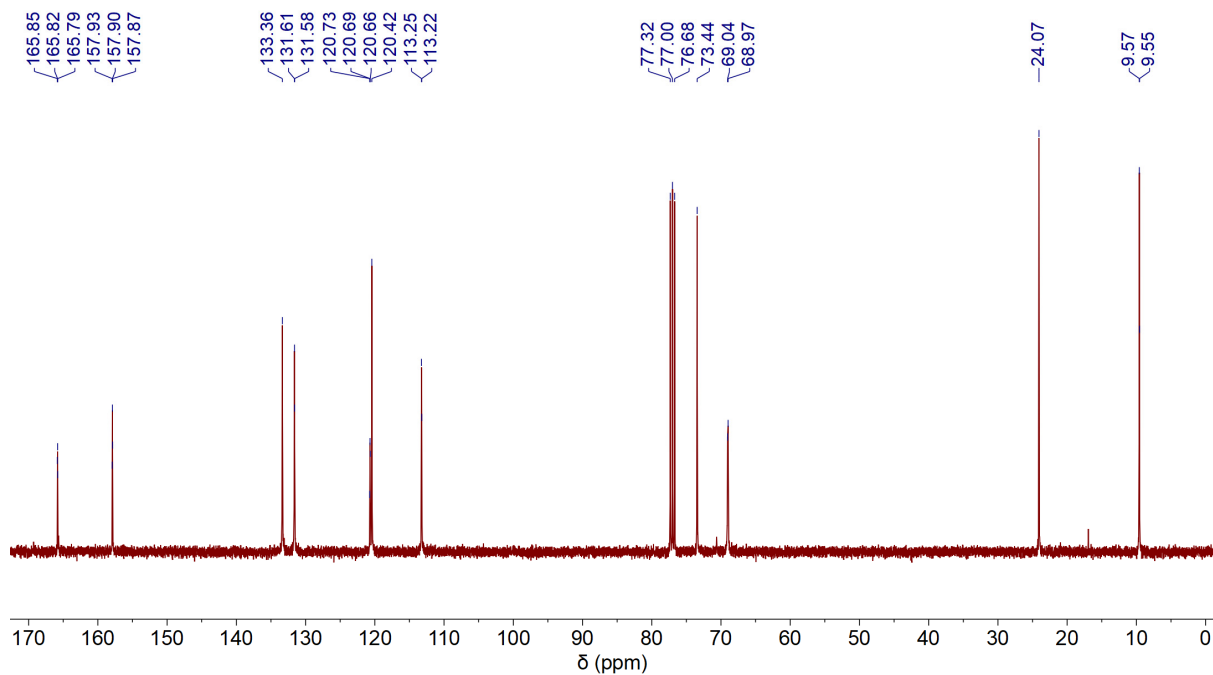

**Fig. S33.**  $^{13}\text{C}$  NMR ( $\text{CDCl}_3$ , 25 °C) spectrum of P(DHB-Me-co-DHB-Et) obtained by  $[\text{DHB-Me}]/[\text{DHB-Et}]/[\text{Zn1}]/[\text{I}] = 50/1000/1/1$ .

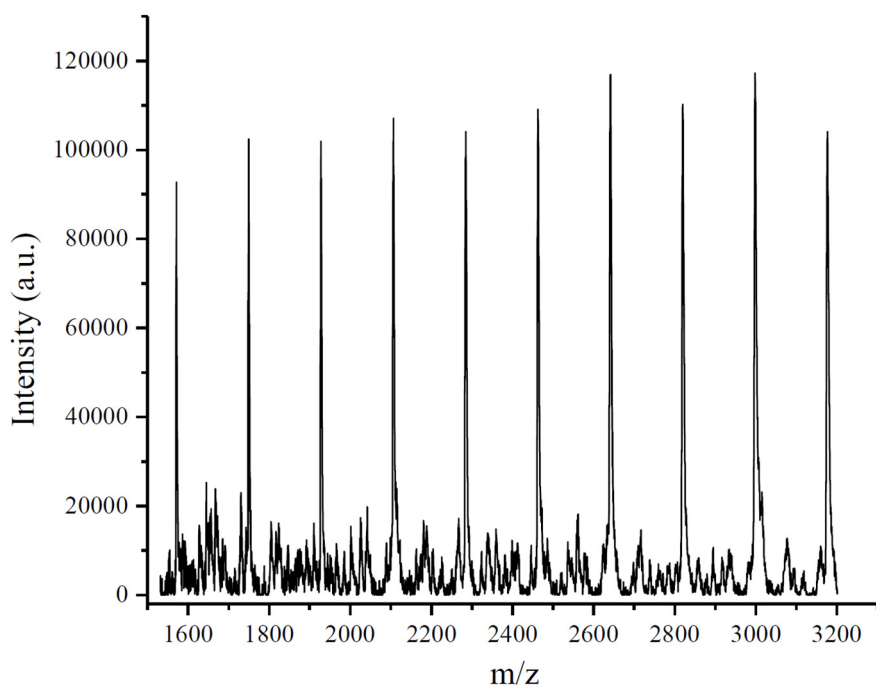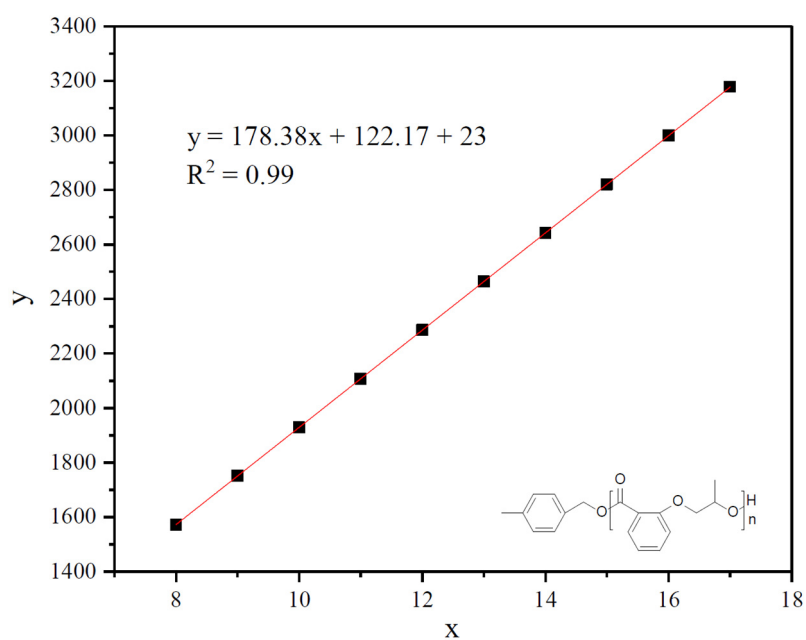

**Figure S34.** a) MALDI-TOF MS spectrum of the low-molecular-weight P(DHB-Me) produced by [DHB-Me]/[Zn1]/[I] = 50/1/1. b) linear plot of  $m/z$  values ( $y$ ) vs the number of DHB-Me repeat units ( $x$ ).

The spacing between the two neighboring molecular ion peaks corresponding to the exact molar mass of the repeat unit, DHB-Me [mass/charge ratio ( $m/z$ ) = 178.06], as shown by the slope of the linear plot of  $m/z$  values ( $y$  axis) versus the number of DHB-Me repeat units ( $x$  axis). The intercept of the plot,  $122.17 + 23$ , represents the total mass of chain ends plus the mass of  $\text{Na}^+$  [ $M_{\text{end}} = 122.17$  ( $\text{CH}_3\text{C}_6\text{H}_4\text{CH}_2\text{OH}$ ) g/mol +  $23$  ( $\text{Na}^+$ ) g/mol], corresponding to linear structure  $\text{CH}_3\text{C}_6\text{H}_4\text{CH}_2\text{O}-[\text{DHB-Me}]_n-\text{H}$ .

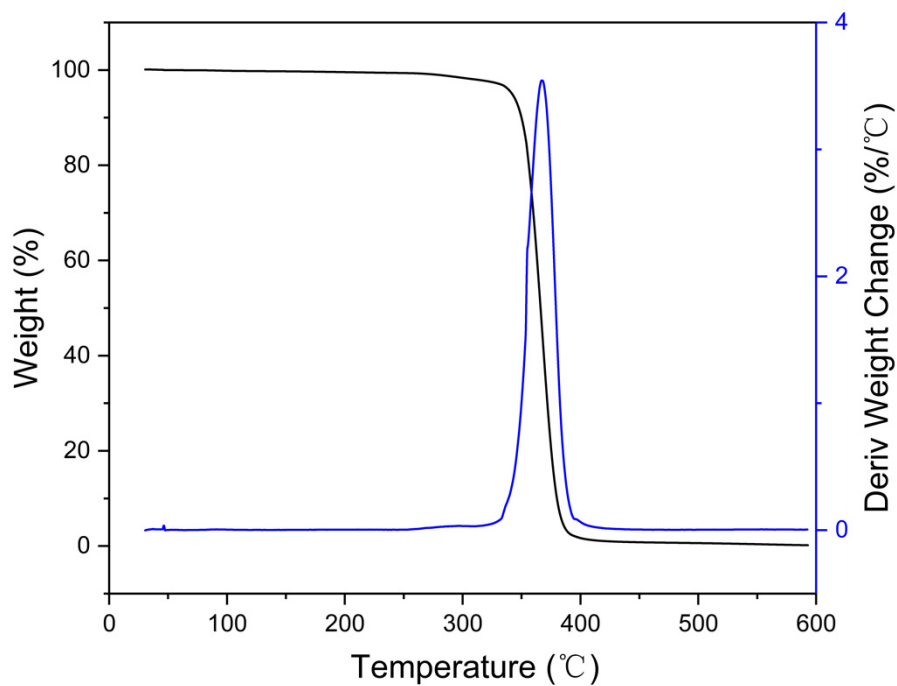

**Fig. S35.** TGA and DTG curves for P(DHB-Me) obtained by  $[\text{DHB-Me}]/[\text{Zn1}]/[\text{I}] = 500/1/1$ ,  $T_d = 342\text{ }^\circ\text{C}$ ,  $T_{\text{max}} = 367\text{ }^\circ\text{C}$ .

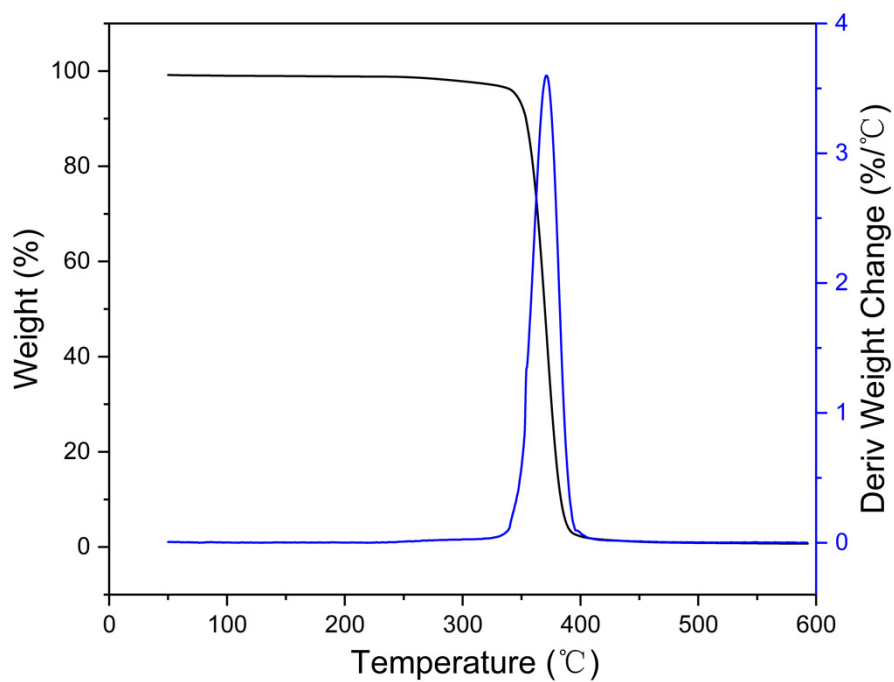

**Fig. S36.** TGA and DTG curves for P[(R)-DHB-Me] obtained by  $[(R)\text{-DHB-Me}]/[\text{Zn1}]/[\text{I}] = 500/1/1$ ,  $T_d = 345\text{ }^\circ\text{C}$ ,  $T_{\text{max}} = 371\text{ }^\circ\text{C}$ .

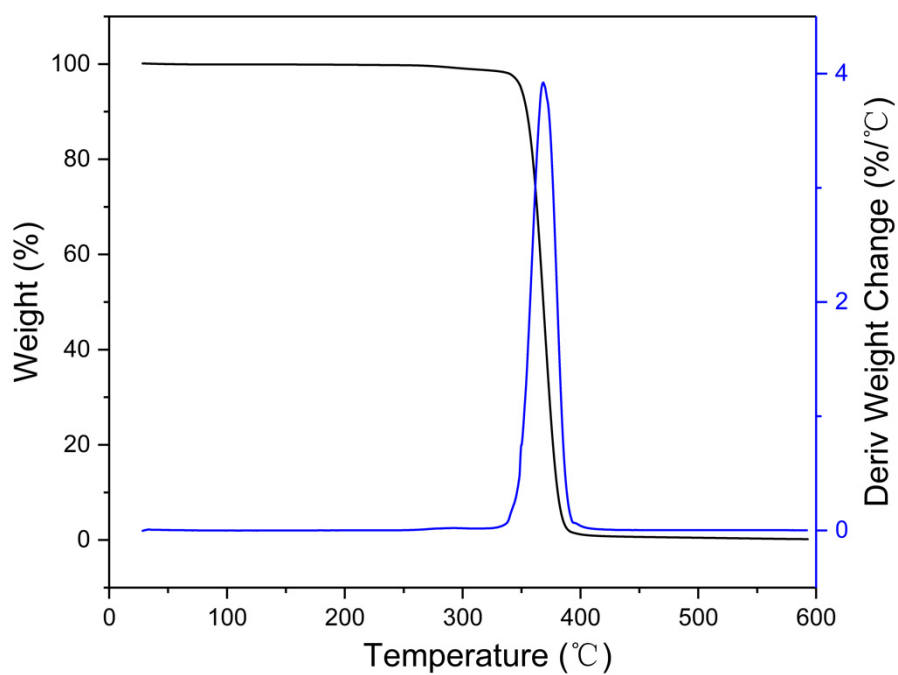

**Fig. S37.** TGA and DTG curves for P(DHB-Et) obtained by [DHB-Et]/[Zn1]/[I] = 500/1/1,  $T_d = 349\text{ }^\circ\text{C}$ ,  $T_{\max} = 368\text{ }^\circ\text{C}$ .

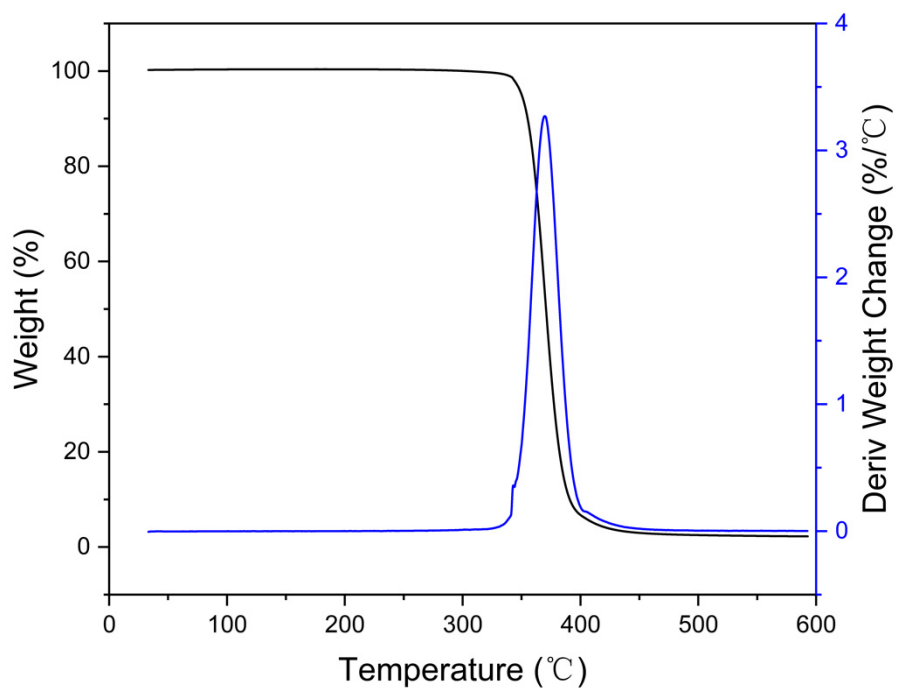

**Fig. S38.** TGA and DTG curves for P(DHN-Me) obtained by [DHN-Me]/[Zn1]/[I] = 500/1/1,  $T_d = 336\text{ }^\circ\text{C}$ ,  $T_{\max} = 369\text{ }^\circ\text{C}$ .

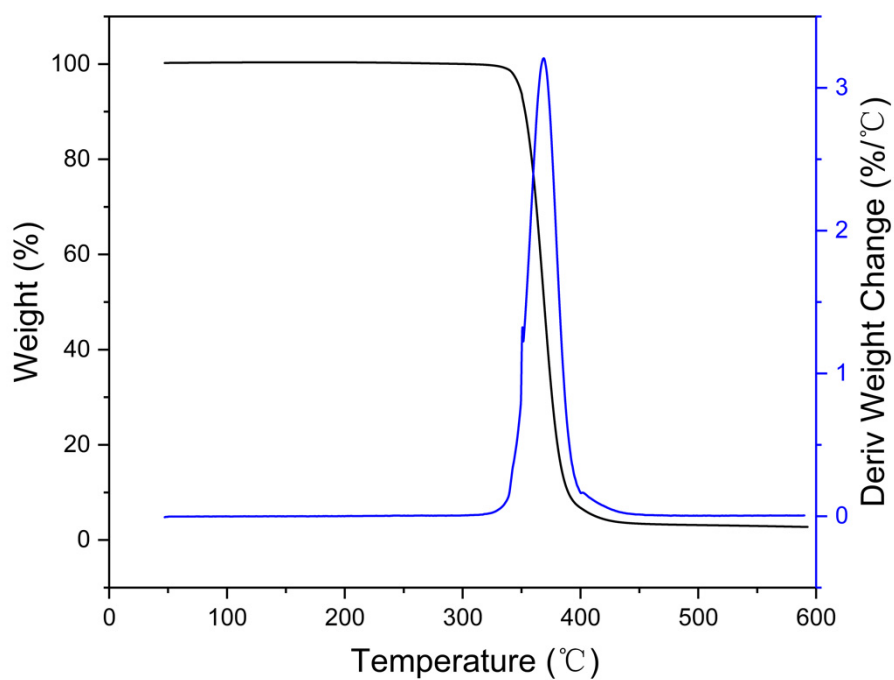

**Fig. S39.** TGA and DTG curves for P[(*R*)-DHN-Me] obtained by [(*R*)-DHN-Me]/[Zn1]/[I] = 500/1/1,  $T_d = 349\text{ }^\circ\text{C}$ ,  $T_{max} = 369\text{ }^\circ\text{C}$ .

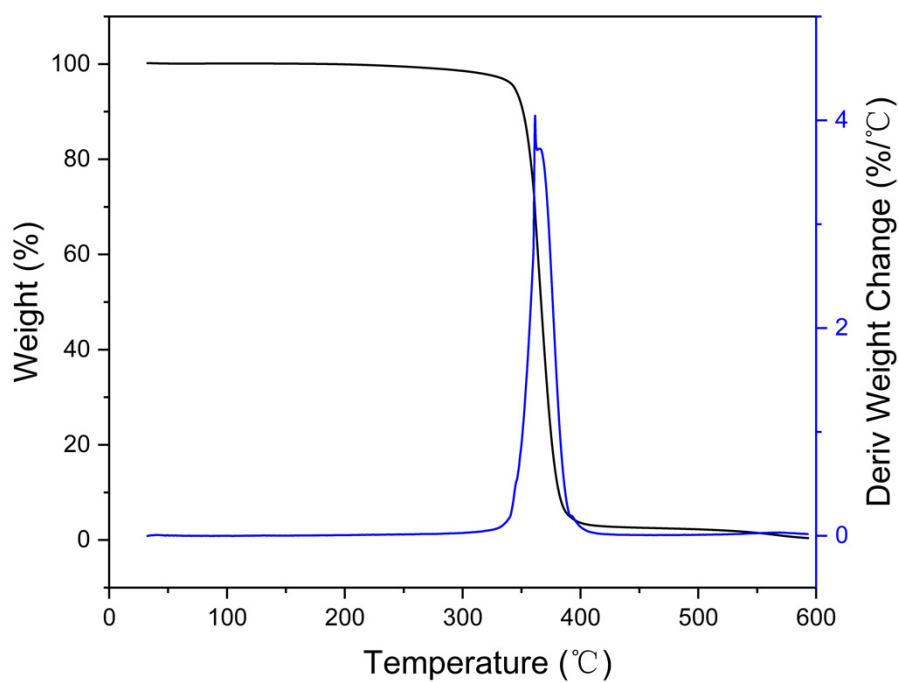

**Fig. S40.** TGA and DTG curves for P(DHN-Et) obtained by [DHN-Et]/[Zn1]/[I] = 500/1/1,  $T_d = 344\text{ }^\circ\text{C}$ ,  $T_{max} = 361\text{ }^\circ\text{C}$ .

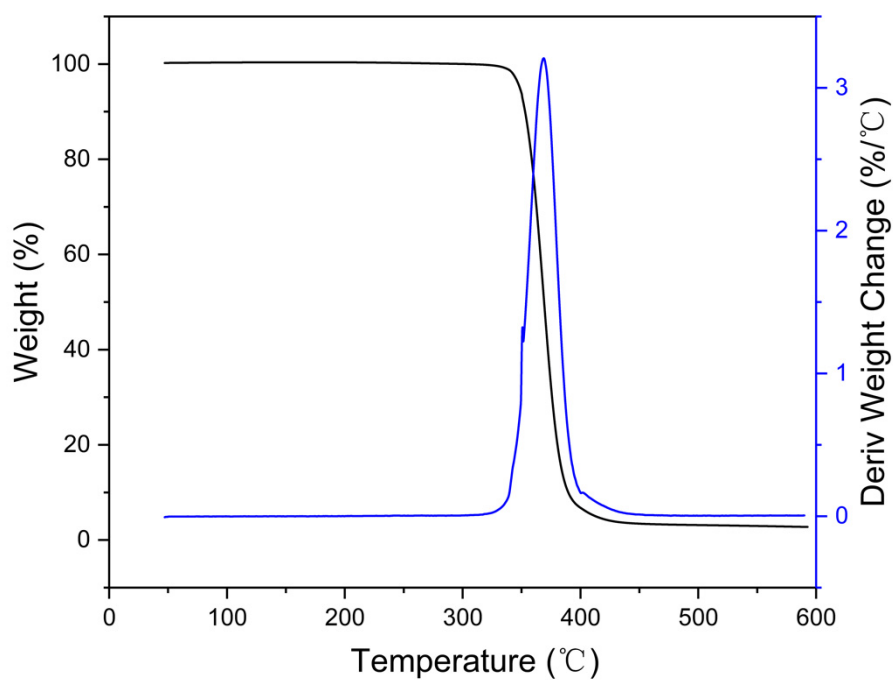

**Fig. S41.** TGA and DTG curves for P(DHB-Me-co-DHB-Et) obtained by [DHB-Me]/[DHB-Et]/[Zn1]/[I] = 50/1000/1/1,  $T_d = 342$  °C,  $T_{max} = 366$  °C.

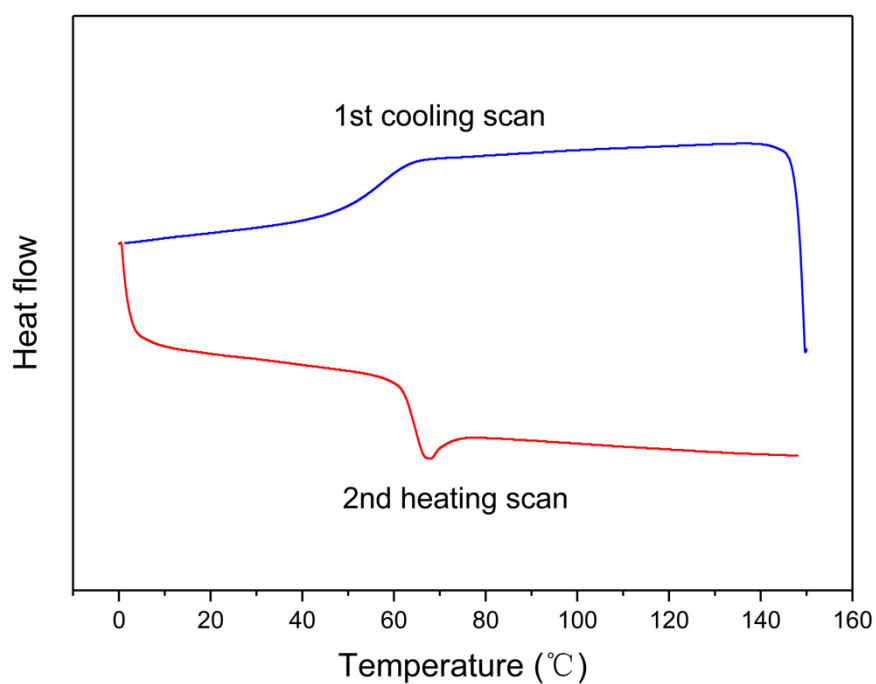

**Fig. S42.** DSC curves for P(DHB-Me) obtained by [DHB-Me]/[Zn1]/[I] = 500/1/1,  $T_g = 65$  °C.



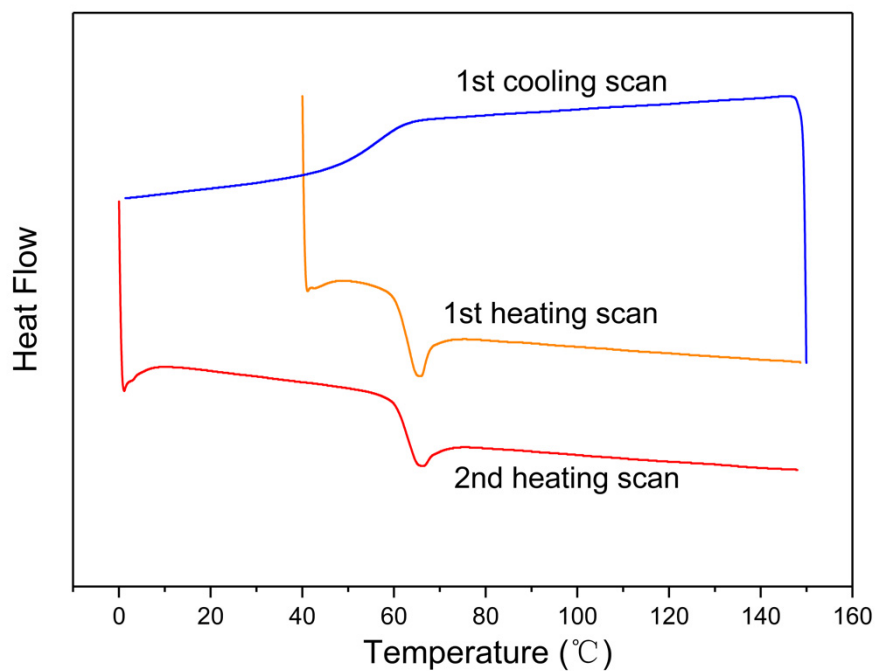

**Fig. S43.** DSC curves for P[(R)-DHB-Me] obtained by [(R)-DHB-Me]/[Zn1]/[I] = 500/1/1,  $T_g = 63$  °C.

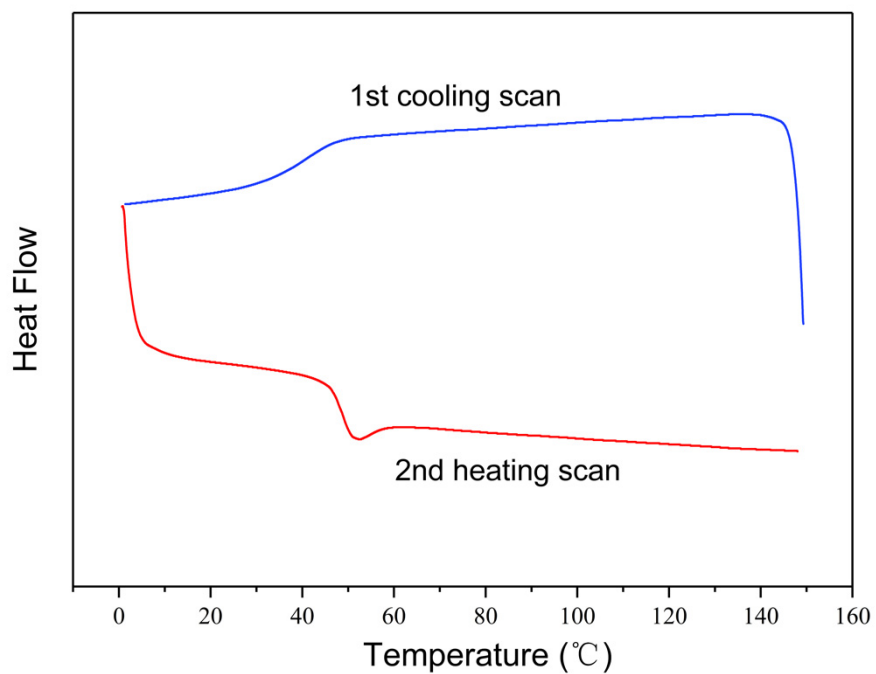

**Fig. S44.** DSC curves for P(DHB-Et) obtained by [DHB-Et]/[Zn1]/[I] = 500/1/1,  $T_g = 49$  °C.

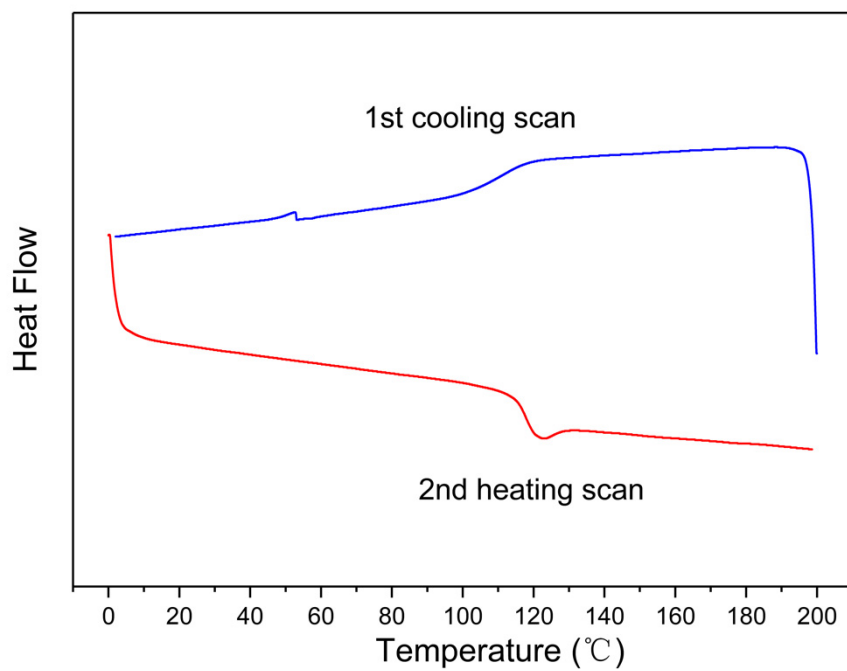

**Fig. S45.** DSC curves for P(DHN-Me) obtained by  $[\text{DHN-Me}]/[\text{Zn1}]/[\text{I}] = 500/1/1$ ,  $T_g = 118$  °C.

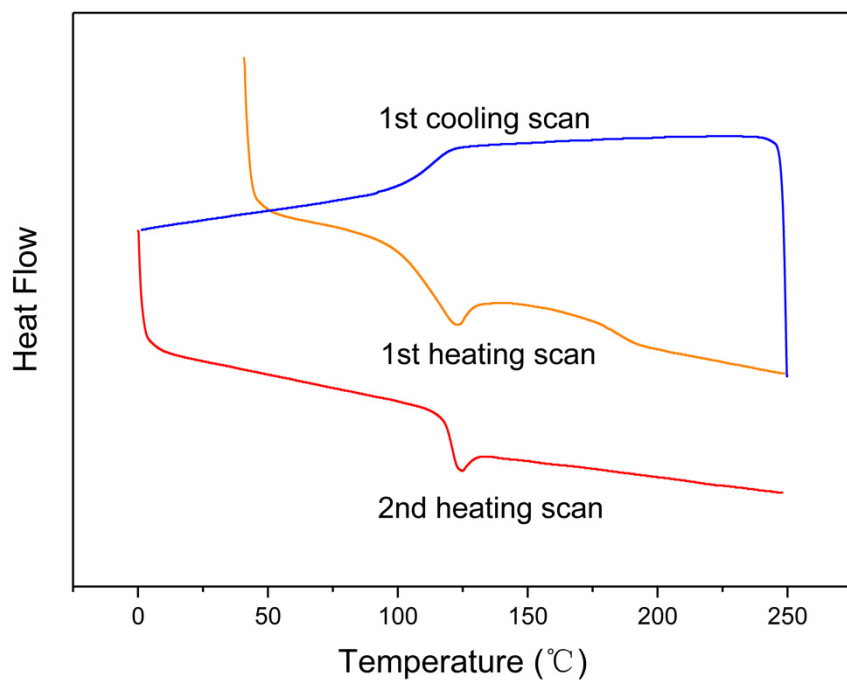

**Fig. S46.** DSC curves for P[(R)-DHN-Me] obtained by  $[(R)\text{-DHN-Me}]/[\text{Zn1}]/[\text{I}] = 500/1/1$ ,  $T_g = 121$  °C.

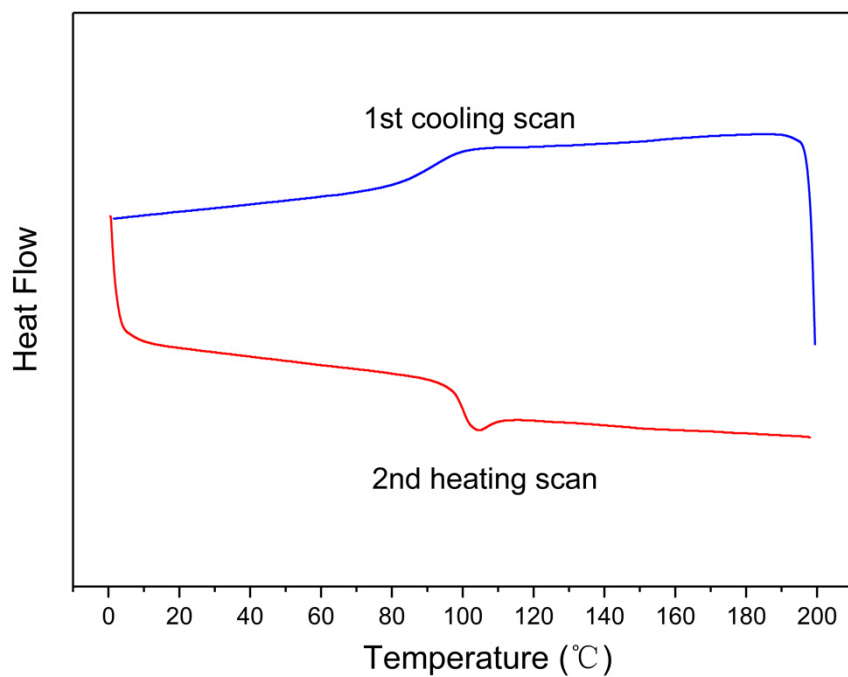

**Fig. S47.** DSC curves for P(DHN-Et) obtained by  $[\text{DHN-Et}]/[\text{Zn1}]/[\text{I}] = 500/1/1$ ,  $T_g = 100\text{ }^\circ\text{C}$ .

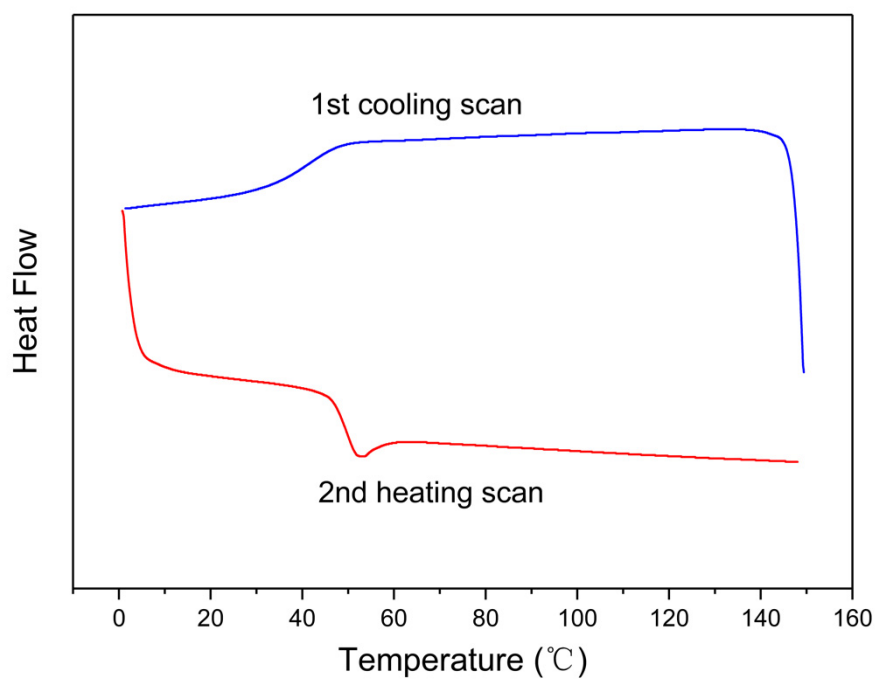

**Fig. S48.** DSC curves for P(DHB-Me-co-DHB-Et) obtained by  $[\text{DHB-Me}]/[\text{DHB-Et}]/[\text{Zn1}]/[\text{I}] = 50/1000/1/1$ ,  $T_g = 50\text{ }^\circ\text{C}$ .

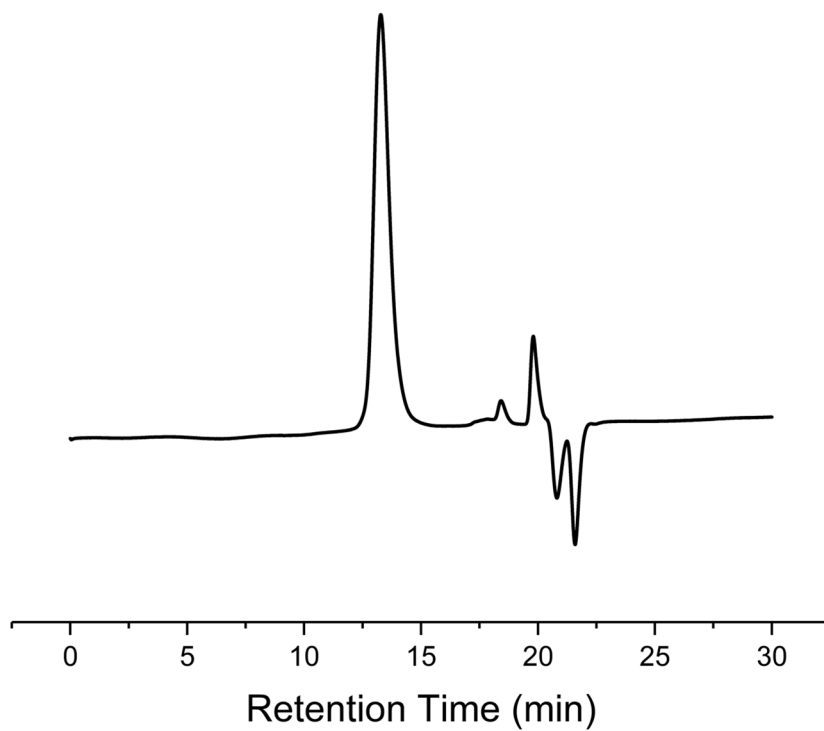

**Fig. S49.** GPC trace of P(DHB-Me) obtained by  $[\text{DHB-Me}]/[\text{Zn1}]/[\text{I}] = 1000/1/1$ ,  $M_n = 97.6 \text{ kg. mol}^{-1}$ ,  $\bar{D} = 1.19$  (Table 1, entry 4).

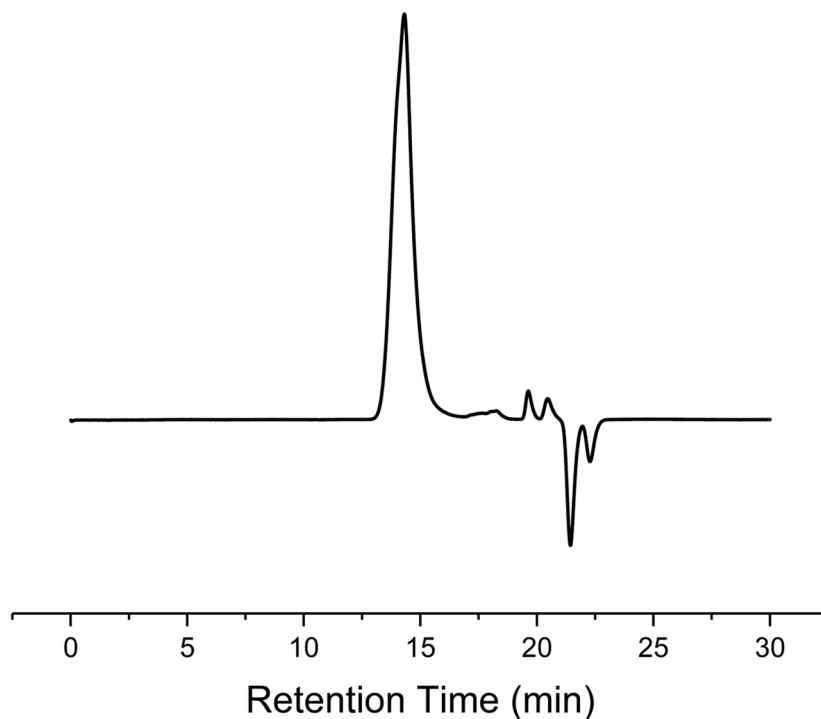

**Fig. S50.** GPC trace of P[(R)-DHB-Me] obtained by  $[(R)\text{-DHB-Me}]/[\text{Zn1}]/[\text{I}] = 500/1/1$ ,  $M_n = 36.6 \text{ kg. mol}^{-1}$ ,  $\bar{D} = 1.25$  (Table 1, entry 6).

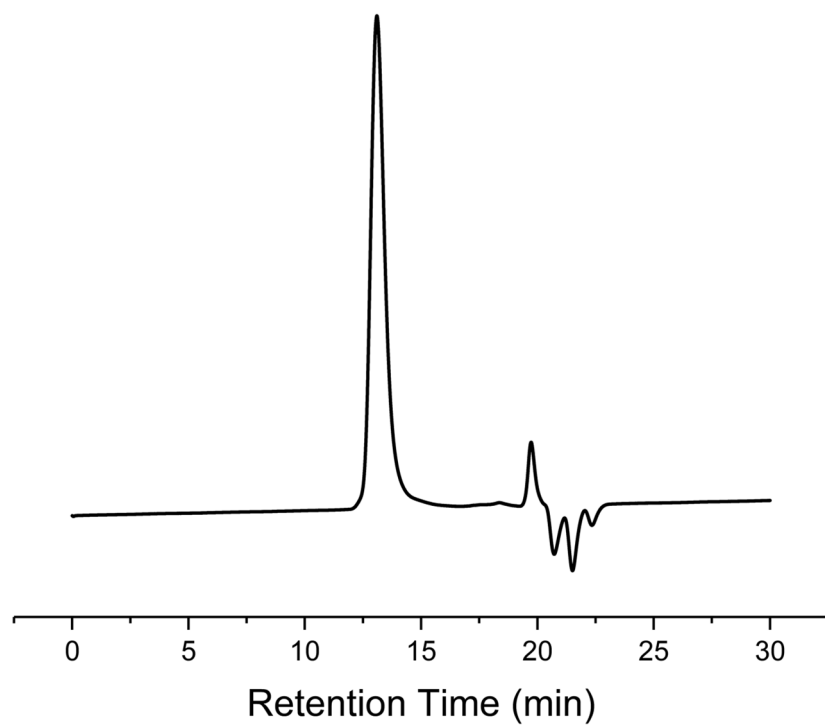

**Fig. S51.** GPC trace of P(DHB-Et) obtained by [DHB-Et]/[Zn1]/[I] = 1000/1/1,  $M_n = 123$  kg. mol<sup>-1</sup>,  $\bar{D} = 1.17$  (Table 1, entry 12).

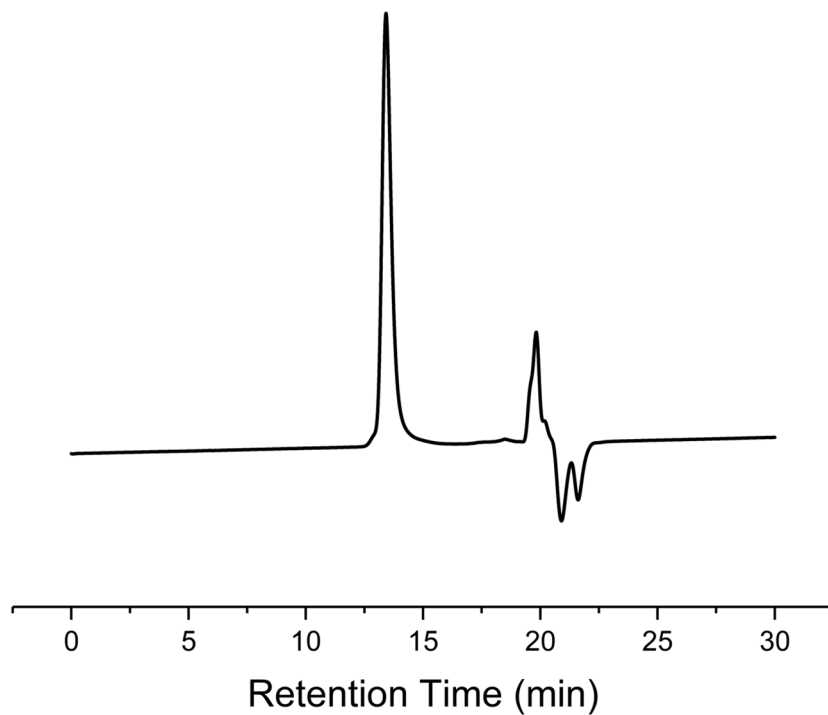

**Fig. S52.** GPC trace of P(DHN-Me) obtained by [DHN-Me]/[Zn1]/[I] = 500/1/1,  $M_n = 66.0$  kg. mol<sup>-1</sup>,  $\bar{D} = 1.13$  (Table 1, entry 14).

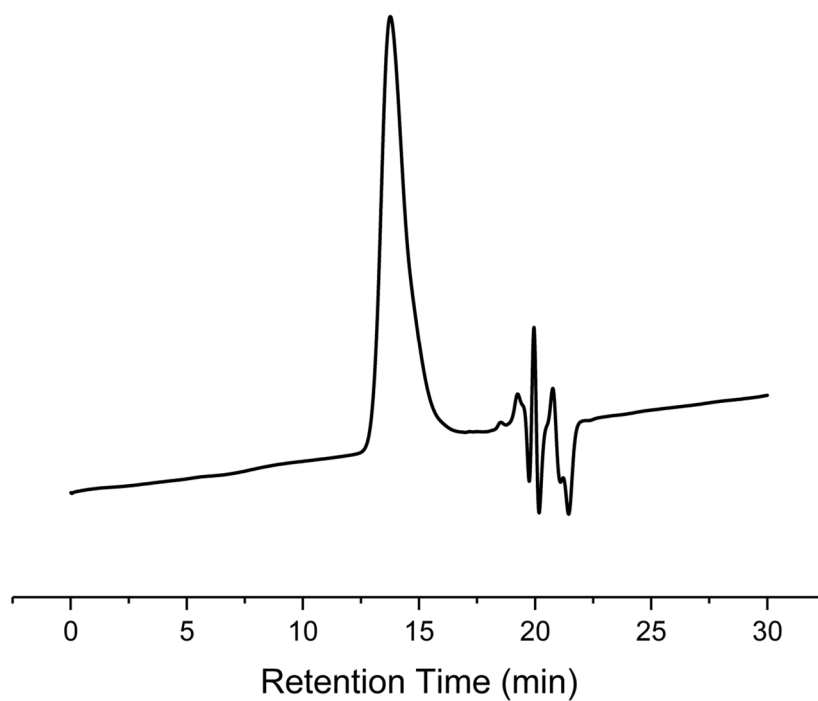

**Fig. S53.** GPC trace of P[(*R*)-DHN-Me] obtained by [(*R*)-DHN-Me]/[Zn1]/[I] = 500/1/1,  $M_n = 42.5 \text{ kg. mol}^{-1}$ ,  $\mathcal{D} = 1.57$  (Table 1, entry 17).

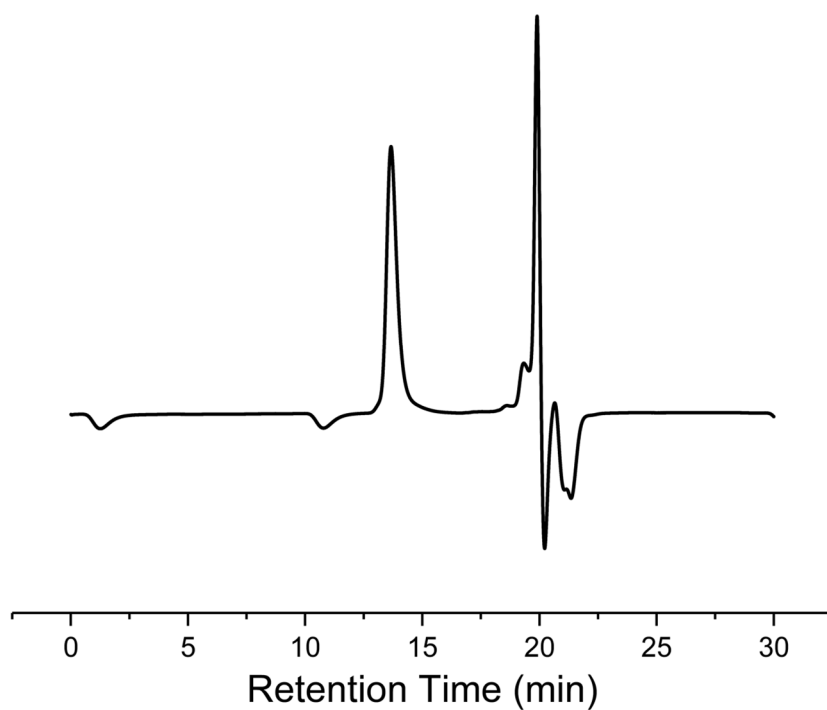

**Fig. S54.** GPC trace of P(DHN-Et) obtained by [DHN-Et]/[Zn1]/[I] = 1000/1/1,  $M_n = 66.7 \text{ kg mol}^{-1}$ ,  $\mathcal{D} = 1.10$  (Table 1, entry 21).

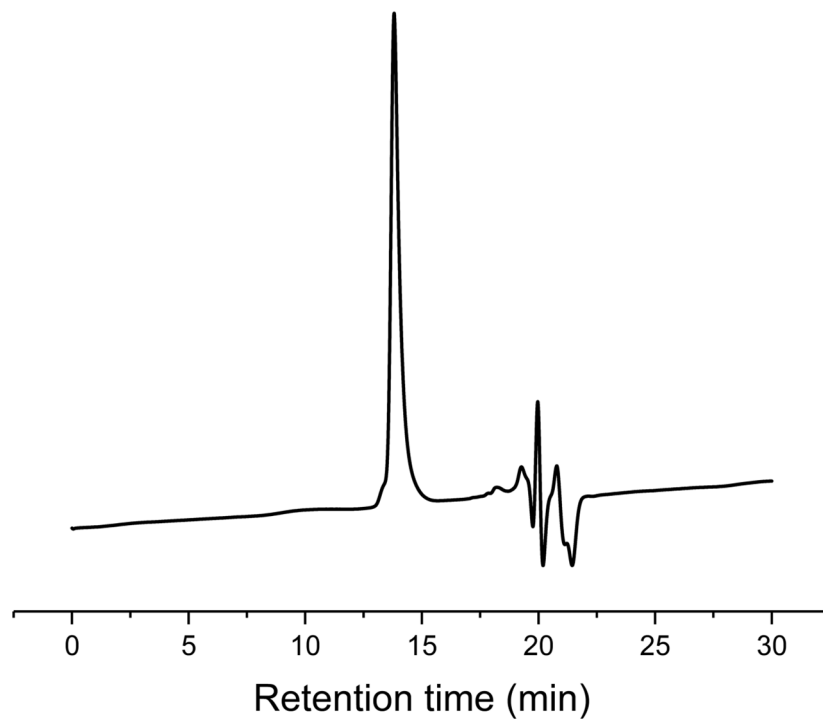

**Fig. S55.** GPC trace of P(DHB-Me-co-DHB-Et) obtained by [DHB-Me]/[DHB-Et]/[Zn1]/[I] = 50/1000/1/1,  $M_n = 57.5 \text{ kg mol}^{-1}$ ,  $\mathcal{D} = 1.13$  (Table S1, entry 1).

## General Stereocomplexation Procedures

Stereocomplexes were prepared from a mixture of isotactic (*R*)-polymer and (*S*)-polymer in a 1:1 molar ratio (approximately 100 mg total). The solid polymer sample was dissolved in  $\text{CHCl}_3$  ( $20 \text{ mg mL}^{-1}$ ), filtered through a plastic frit ( $0.22 \mu\text{m}$  pore size nylon filter), and allowed to evaporate slowly and undisturbedly for 3–7 days. The obtained crystalline solid was collected and dried in a vacuum oven at  $60 \text{ }^\circ\text{C}$  to a constant weight.

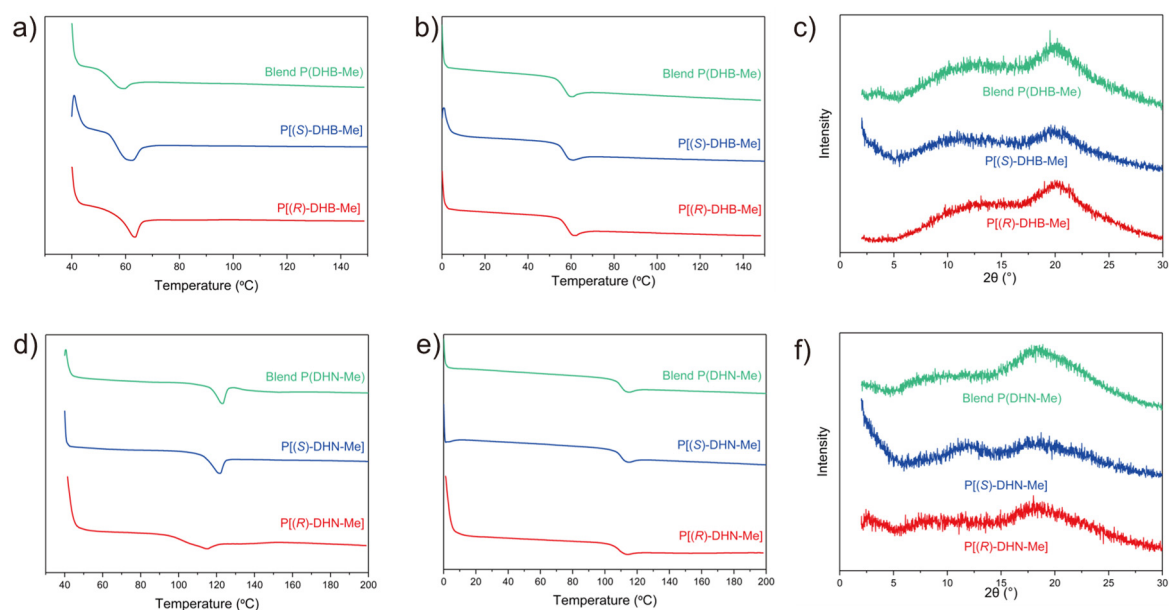

**Fig. S56.** a) DSC curves for P(DHB-Me)s (first heating,  $10^\circ\text{C min}^{-1}$ ); b) DSC curves for P(DHB-Me)s (second heating,  $10^\circ\text{C min}^{-1}$ ); c) PXRD spectra of P(DHB-Me)s; d) DSC curves for P(DHN-Me)s (first heating,  $10^\circ\text{C min}^{-1}$ ); e) DSC curves for P(DHN-Me)s (second heating,  $10^\circ\text{C min}^{-1}$ ); f) PXRD spectra of P(DHN-Me)s.



## Mechanical Property

**Table S2.** Summary of mechanical properties of polymers. <sup>a</sup>

| Polymer             | $M_n$ /KDa | E/GPa       | $\sigma_y$ /MPa | $\sigma_B$ /MPa | Elongation/%   |
|---------------------|------------|-------------|-----------------|-----------------|----------------|
| P(DHB-Me)           | 97.6       | 2.17 ± 0.36 | -               | 33.69 ± 5.39    | 10.91 ± 2.15   |
| P(DHB-Et)           | 123        | 0.74 ± 0.17 | 5.78 ± 2.91     | 3.16 ± 0.57     | 762.63 ± 94.40 |
| P(DHN-Me)           | 88.7       | 2.11 ± 0.34 | -               | 45.35 ± 1.94    | 3.10 ± 0.45    |
| P(DHN-Et)           | 66.7       | 0.98 ± 0.11 | -               | 35.18 ± 1.58    | 4.30 ± 0.62    |
| P(DHB-Me-co-DHB-Et) | 57.5       | 0.82 ± 0.11 | -               | 38.16 ± 3.56    | 5.86 ± 0.56    |

<sup>a</sup>Condition: Tested by uniaxial tensile tests. Strain rate of 10 mm/min, E: Tensile modulus,  $\sigma_y$ : yield strength,  $\sigma_B$ : break strength.

**Table S3.** Summary of mechanical properties of P(DHB-Me). <sup>a</sup>

| Sample | E/MPa   | $\sigma_B$ /MPa | Elongation/% |
|--------|---------|-----------------|--------------|
| 1      | 1832.32 | 33.61           | 14.25        |
| 2      | 2889.78 | 44.42           | 11.84        |
| 3      | 1806.38 | 33.36           | 9.97         |
| 4      | 2195.33 | 34.68           | 9.41         |
| 5      | 2104.90 | 33.76           | 9.08         |

<sup>a</sup>Condition: Tested by uniaxial tensile tests. Strain rate of 10 mm/min, E: Tensile modulus,  $\sigma_B$ : break strength.

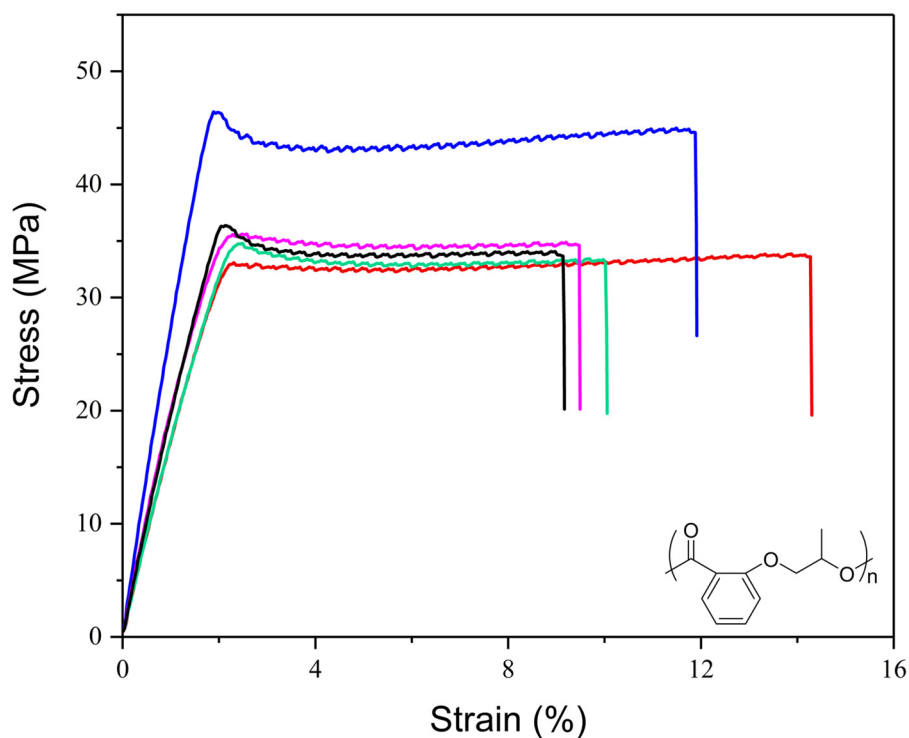

**Figure S57.** Stress-strain curves of P(DHB-Me).

**Table S4.** Summary of mechanical properties of P(DHB-Me)s.

| Polymer       | $M_n$ /KDa | E/GPa           | $\sigma_b$ /MPa  | Elongation/%    |
|---------------|------------|-----------------|------------------|-----------------|
| P(DHB-Me)     | 35.0       | $2.28 \pm 0.20$ | $39.30 \pm 1.31$ | $2.89 \pm 0.27$ |
| P[(R)-DHB-Me] | 36.6       | $2.40 \pm 0.14$ | $31.30 \pm 1.82$ | $1.73 \pm 0.24$ |
| P[(S)-DHB-Me] | 36.6       | $2.51 \pm 0.14$ | $35.69 \pm 4.27$ | $1.96 \pm 0.21$ |

[a] Condition: Tested by uniaxial tensile tests. Strain rate of 5 mm/min, E: Tensile modulus,  $\sigma_y$ : yield strength,  $\sigma_b$ : break strength.

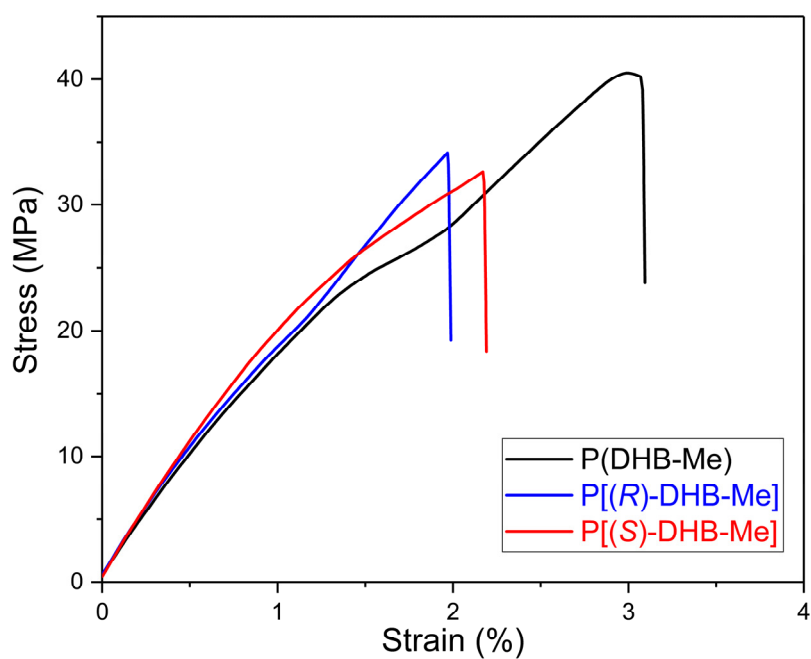

**Fig S58.** Stress-Strain curves of P(DHB-Me)s.

**Table S5.** Summary of mechanical properties of P(DHB-Et).<sup>a</sup>

| Sample | E/MPa  | $\sigma_Y$ /MPa | $\sigma_B$ /MPa | Elongation/% |
|--------|--------|-----------------|-----------------|--------------|
| 1      | 719.29 | 7.66            | 2.87            | 719.29       |
| 2      | 498.07 | 2.41            | 2.43            | 885.31       |
| 3      | 702.43 | 3.51            | 3.16            | 852.97       |
| 4      | 977.22 | 9.50            | 3.97            | 680.84       |
| 5      | 803.47 | 5.80            | 2.99            | 700.44       |

<sup>a</sup>Condition: Tested by uniaxial tensile tests. Strain rate of 10 mm/min, E: Tensile modulus,  $\sigma_Y$ : yield strength,  $\sigma_B$ : break strength.

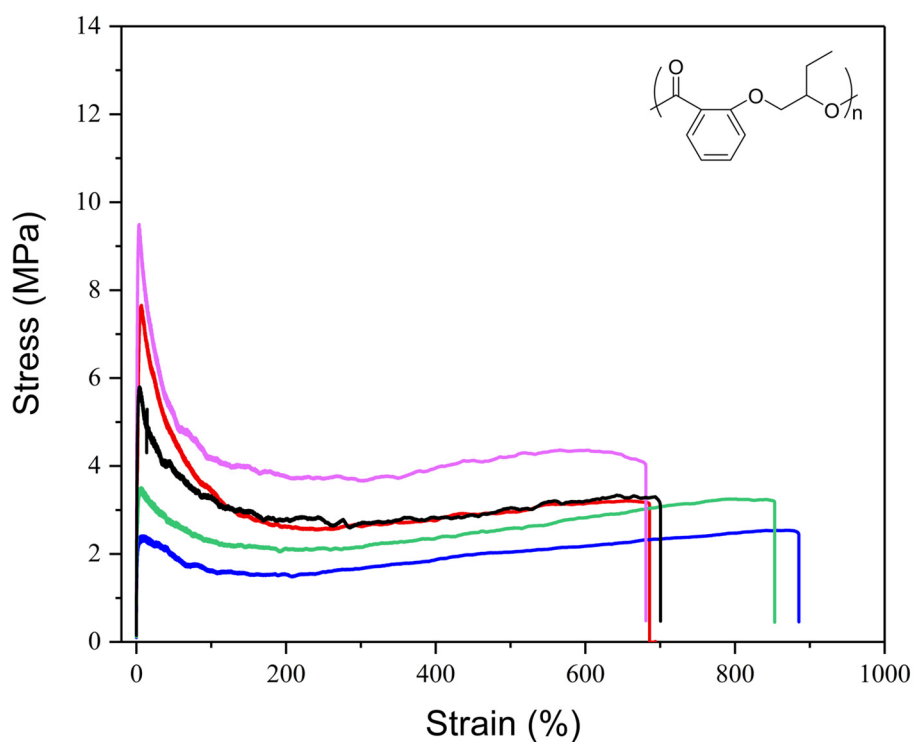

**Figure S59.** Stress-strain curves of P(DHB-Et).

**Table S6.** Summary of mechanical properties of P(DHN-Me).<sup>a</sup>

| Sample | E/MPa   | $\sigma_B$ /MPa | Elongation/% |
|--------|---------|-----------------|--------------|
| 1      | 1948.34 | 42.23           | 3.66         |
| 2      | 2014.98 | 46.11           | 2.74         |
| 3      | 2338.01 | 46.48           | 2.66         |
| 4      | 2074.36 | 44.80           | 3.47         |
| 5      | 2176.40 | 47.13           | 2.95         |

<sup>a</sup>Condition: Tested by uniaxial tensile tests. Strain rate of 10 mm/min, E: Tensile modulus,  $\sigma_B$ : break strength.

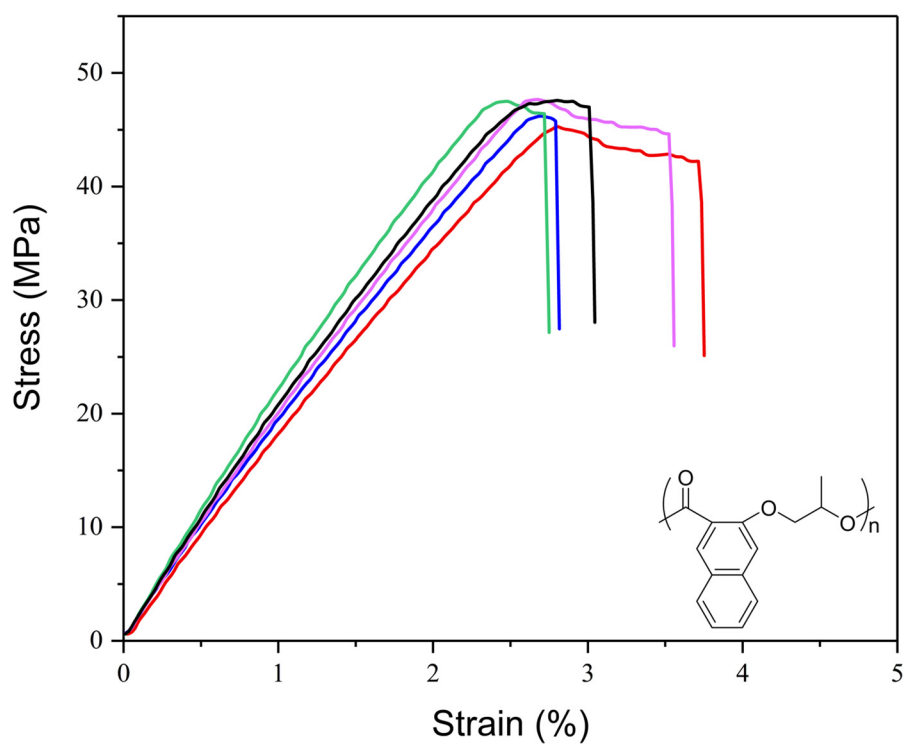

**Figure S60.** Stress-strain curves of P(DHN-Me).

**Table S7.** Summary of mechanical properties of P(DHN-Et).<sup>a</sup>

| Sample | E/MPa   | $\sigma_B$ /MPa | Elongation/% |
|--------|---------|-----------------|--------------|
| 1      | 947.96  | 36.69           | 4.93         |
| 2      | 841.30  | 34.79           | 4.78         |
| 3      | 961.53  | 33.67           | 3.99         |
| 4      | 1017.85 | 36.98           | 4.40         |
| 5      | 1135.20 | 33.77           | 3.40         |

<sup>a</sup>Condition: Tested by uniaxial tensile tests. Strain rate of 10 mm/min, E: Tensile modulus,  $\sigma_B$ : break strength.

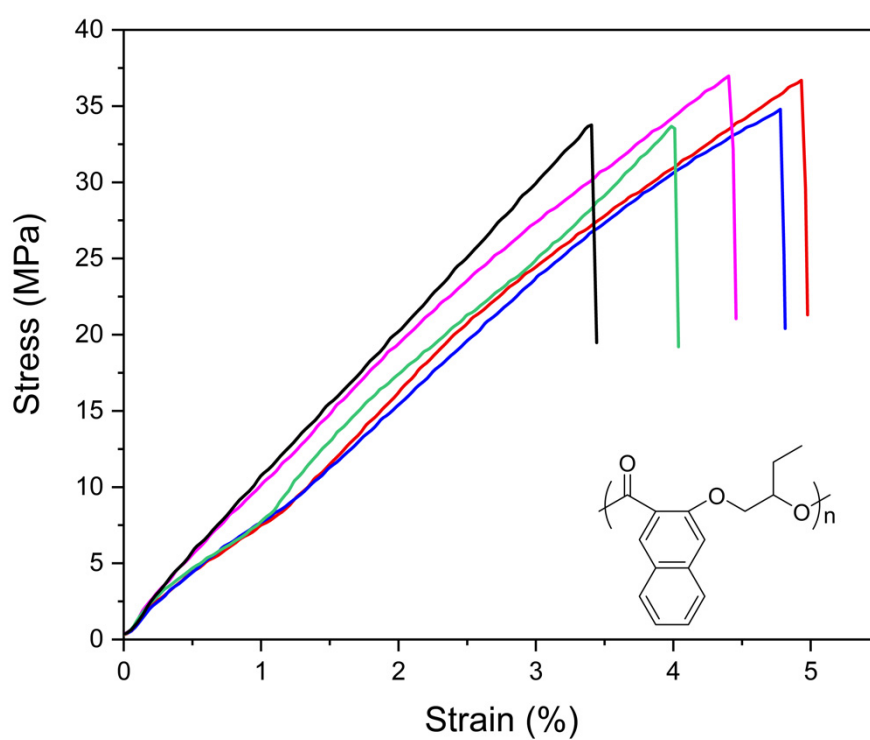

**Figure S61.** Stress-strain curves of P(DHN-Et).

**Table S8.** Summary of mechanical properties of P(DHB-Me-co-DHB-Et).<sup>a</sup>

| Sample | E/MPa  | $\sigma_B$ /MPa | Elongation/% |
|--------|--------|-----------------|--------------|
| 1      | 881.97 | 41.55           | 5.70         |
| 2      | 635.25 | 32.10           | 6.64         |
| 3      | 931.03 | 38.88           | 5.19         |
| 4      | 837.59 | 39.14           | 5.59         |
| 5      | 810.76 | 39.11           | 6.17         |

<sup>a</sup>Condition: Tested by uniaxial tensile tests. Strain rate of 10 mm/min, E: Tensile modulus,  $\sigma_B$ : break strength.

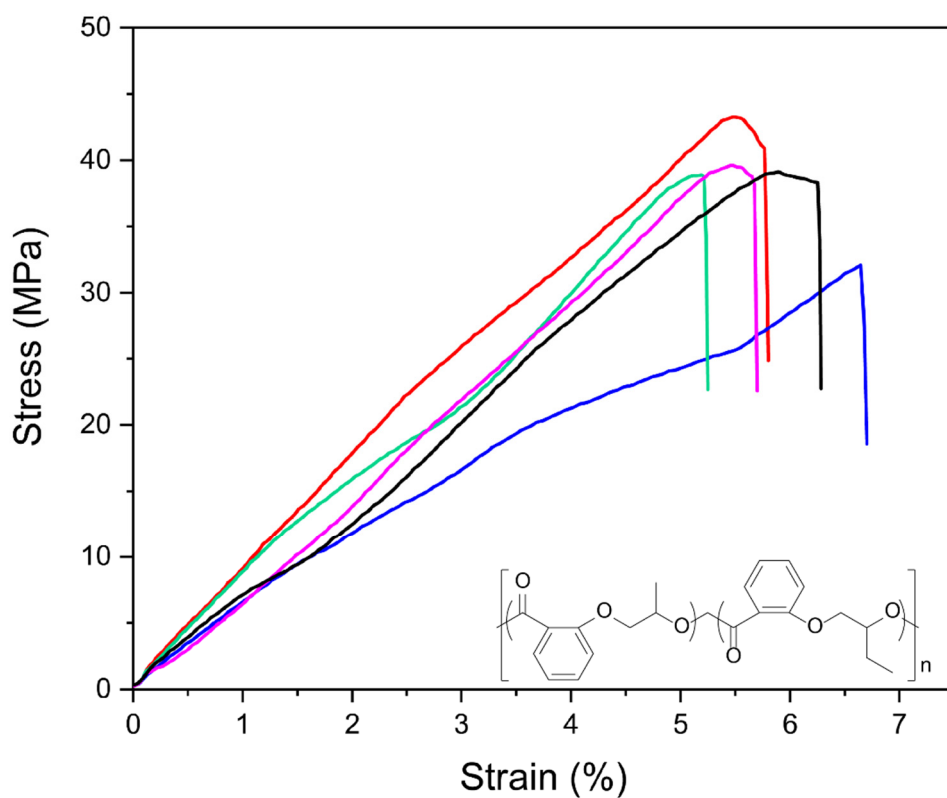

**Figure S62.** Stress-strain curves of P(DHB-Me-co-DHB-Et).

## Thermodynamic study

In an argon-filled glovebox, a toluene stock solution of DHB-Me (712.2 mg, 4 mmol), *p*-tolylmethanol (4.9 mg, 0.04 mmol) and **Zn1** (23.6 mg, 0.04 mmol) was prepared in a 2 mL volumetric flask. The stock solution was divided equally to 4 vials (2 mL). Then the vials were sealed and brought outside of glovebox. After stirring at specific temperature for 5 h, the reaction was quenched by addition of 0.3 mL  $\text{CDCl}_3$  containing benzoic acid (1 wt%). The polymerization reaction reached equilibrium at 45–75 °C and the conversion of DHB-Me was monitored by  $^1\text{H}$  NMR. The equilibrium monomer concentration,  $[\text{DHB-Me}]_{\text{eq}}$ , was measured to be 0.68, 0.80, 0.94 and 1.10 mol.  $\text{L}^{-1}$  for 45 °C, 55 °C, 65 °C and 75 °C. The Van't Hoff plot of  $\ln[\text{DHB-Me}]_{\text{eq}}$  versus  $1/T \times 10^3$  gave a linear fitting with a slope of  $-1.78$  and an intercept of 5.21, from which the thermodynamic parameters were calculated to be  $\Delta H_p^\circ = -14.8 \text{ kJ. mol}^{-1}$  and  $\Delta S_p^\circ = -43.3 \text{ J. mol}^{-1.} \text{ K}^{-1}$ , based on the equation  $\ln[\text{DHB-Me}]_{\text{eq}} = \Delta H_p^\circ/RT - \Delta S_p^\circ/R$ , where  $R$  is the molar gas constant.  $T_c$  was calculated to be 69 °C at  $[\text{DHB-Me}]_0 = 1 \text{ mol/L}$ , based on the equation  $T_c = \Delta H_p^\circ/(\Delta S_p^\circ + R \ln [\text{DHB-Me}]_0)$ .

**Table S9.** Raw data over equilibrium conversion at various temperatures for DHB-Me.<sup>a</sup>

| Entry | T (K) | Conv. <sup>b</sup> (%) | $M_0$ (mol/L) | $T^{-1} \times 10^3$ ( $\text{K}^{-1}$ ) | $[M]_{\text{eq}}$ (mol/L) | $\ln[M]_{\text{eq}}$ (mol/L) |
|-------|-------|------------------------|---------------|------------------------------------------|---------------------------|------------------------------|
| 1     | 318.3 | 66                     | 2.0           | 3.14                                     | 0.68                      | -0.3857                      |
| 2     | 328.3 | 60                     | 2.0           | 3.05                                     | 0.80                      | -0.2231                      |
| 3     | 338.3 | 53                     | 2.0           | 2.96                                     | 0.94                      | -0.0619                      |
| 4     | 348.3 | 45                     | 2.0           | 2.87                                     | 1.10                      | 0.0953                       |

<sup>a</sup>Reaction conditions: Catalyst = **Zn1**, initiator (I) = *p*-tolylmethanol, toluene,  $[\text{DHB-Me}]/[\text{Zn1}]/[\text{I}] = 100/1/1$ ,  $[M]_0 = 2 \text{ mol. L}^{-1}$ . <sup>b</sup>Monomer conversion measured by  $^1\text{H}$  NMR of the quenched solution.

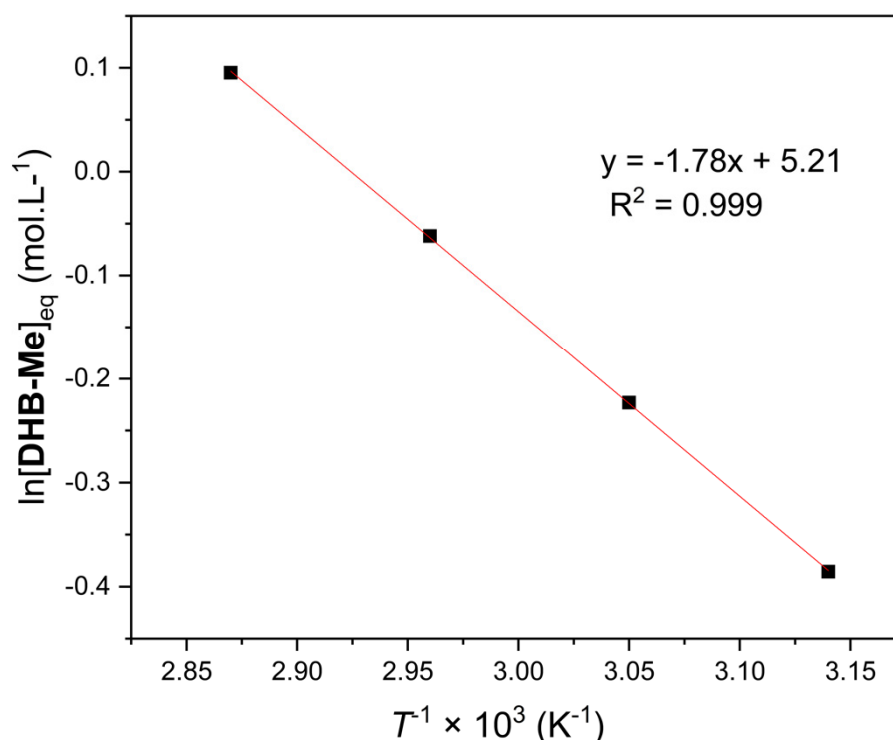

**Fig. S63.** Van't Hoff plot of  $\ln[\text{DHB-Me}]_{\text{eq}}$  vs. reciprocal of the absolute temperature ( $T^{-1}$ ).

### General procedure for the depolymerization of polymers in dilute solutions

The depolymerization was conducted at 120 °C or 140 °C with **Zn1** or TBD as the catalyst. Depolymerization of P(DHB-Me) was used as an example. Inside an argon-filled glovebox, a 15 mL pressure tube was charged with the purified P(DHB-Me) (18 mg), **Zn1** (5 mol%) and toluene (5 mL). The reactor was sealed, taken out of the glovebox, and immersed in the oil bath. The mixture was stirred at 120 °C for 0.5 h. The reaction mixture (3 mL) was withdrawn and concentrated under reduced pressure to determine the conversion by <sup>1</sup>H NMR spectroscopy.

**Table S10.** Results for depolymerization of polymers in dilute solutions.<sup>a</sup>

| Entry | Polymer   | Catalyst | Catalyst loading (mol %) | Temperature (°C) | Time (h) | Conv. <sup>b</sup> (%) |
|-------|-----------|----------|--------------------------|------------------|----------|------------------------|
| 1     | P(DHB-Me) | Zn1      | 5                        | 120              | 0.5      | 96                     |
| 2     | P(DHB-Me) | TBD      | 10                       | 120              | 12       | 63                     |
| 3     | P(DHB-Et) | Zn1      | 5                        | 120              | 0.5      | 94                     |
| 4     | P(DHB-Et) | TBD      | 10                       | 120              | 12       | 74                     |
| 5     | P(DHN-Me) | Zn1      | 5                        | 140              | 0.5      | 80                     |
| 6     | P(DHN-Me) | TBD      | 10                       | 140              | 12       | 93                     |
| 7     | P(DHN-Et) | Zn1      | 5                        | 140              | 0.5      | 83                     |
| 8     | P(DHN-Et) | TBD      | 10                       | 140              | 12       | 98                     |

<sup>a</sup>Reaction conditions: [M] = 0.2 M, toluene. <sup>b</sup>Polymer conversion measured by <sup>1</sup>H NMR of the solution.

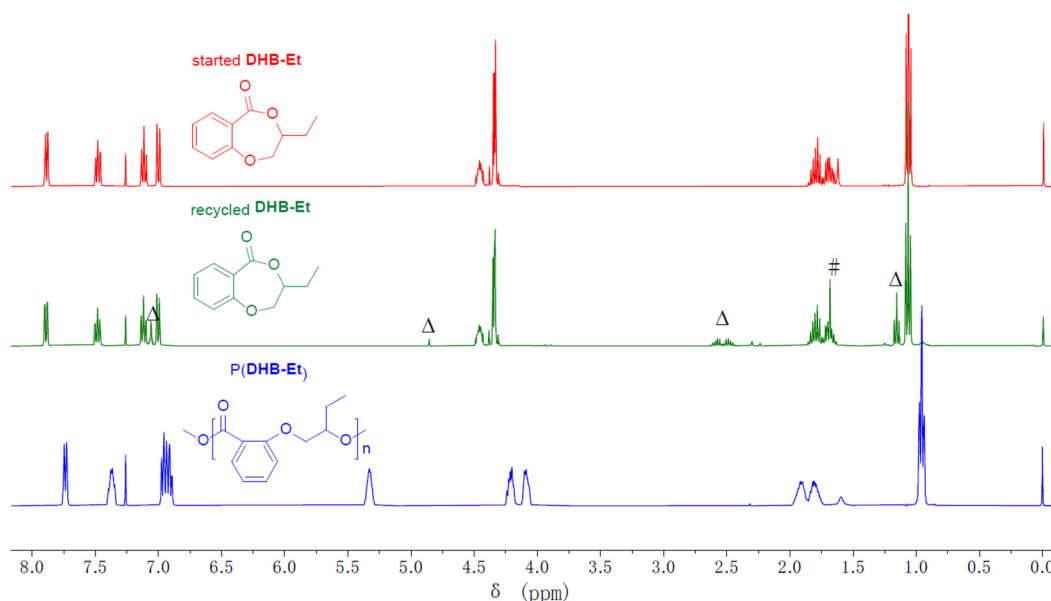

**Fig. S64.** <sup>1</sup>H NMR spectra of P(DHB-Et) prepared by [DHB-Et]/[**Zn1**]/[I] = 100/1/1 (bottom), recycled DHB-Et after depolymerization (middle) and clean starting DHB-Et for comparison (top). (\*solvent toluene impurity,  $\Delta$  catalyst **Zn1** residual, # H<sub>2</sub>O)



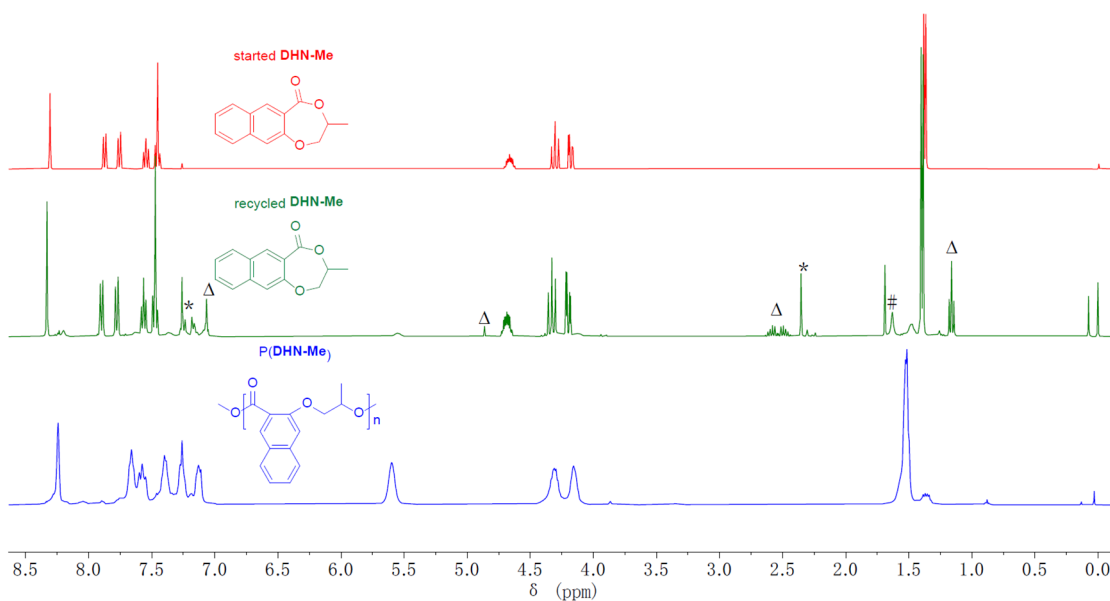

**Fig. S65.**  $^1\text{H}$  NMR spectra of P(DHN-Me) prepared by  $[\text{DHN-Me}]/[\text{Zn1}]/[\text{I}] = 100/1/1$  (bottom), recycled DHN-Me after depolymerization (middle) and clean starting DHN-Me for comparison (top). (\*solvent toluene impurity,  $\Delta$  catalyst **Zn1** residual, #  $\text{H}_2\text{O}$ )

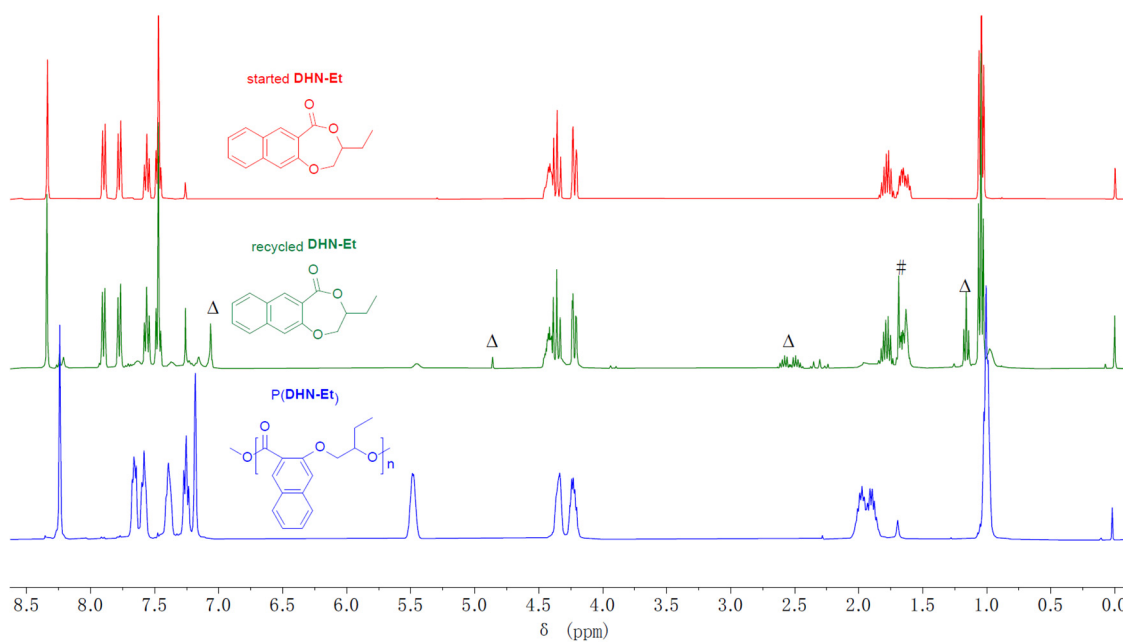

**Fig. S66.**  $^1\text{H}$  NMR spectra of P(DHN-Et) prepared by  $[\text{DHN-Et}]/[\text{Zn1}]/[\text{I}] = 100/1/1$  (bottom), recycled DHN-Et after depolymerization (middle) and clean starting DHN-Et for comparison (top). ( $\Delta$  catalyst **Zn1** residual, #  $\text{H}_2\text{O}$ )

## Reference

- [1] M. Cheng, D. R. Moore, J. J. Reczek, B. M. Chamberlain, E. B. Lobkovsky, G. W. Coates, *J. Am. Chem. Soc.* **2001**, *123*, 8738-8749.
